# Supplementary material for: Genome-wide association study and genotypic variation for the major tocopherol content in rice grain
Source: Front Plant Sci. 2024 Oct 8;15:1426321. doi: 10.3389/fpls.2024.1426321 (PMC11493719; doi:10.3389/fpls.2024.1426321)
Supplement: Supplementary file 2 [file Table1.xlsx]

## Sheet: Supplementary Table S1
Supplementary Table S1. The information of rice association panel.
No	Name	Country	Sub-population
1	Minghui63	China	IND
2	Tainung67	Taiwan	TEJ
3	Zhenshan97B	China	IND
4	Cypress	UnitedStates	TRJ
5	Aijiaonante	China	IND
6	ARC6578	India	AUS
7	ARC7229	India	AUS
8	CarolinaGold	UnitedStates	TRJ
9	CarolinaGoldSel	UnitedStates	TRJ
10	CS-M3	UnitedStates-CA	TEJ
11	Gerdeh	Iran	ADMIX
12	Geumobyeo	SouthKorea	TEJ
13	HabiganjBoro6	Bangladesh	ADMIX
14	HonChim	HongKong	IND
15	ItalicaCarolina	Poland	TEJ
16	Kasalath	India	AUS
17	KeritingTingii	Indonesia	ADMIX
18	Ligerito	Colombia	TRJ
19	Mehr	Iran	AUS
20	Moroberekan	Guinea	TRJ
21	RTS14	Vietnam	IND
22	BR24	Bangladesh	IND
23	KiukiNo.46	Japan	TEJ
24	Agusita	Hungary	TEJ
25	Ai-Chiao-Hong	China	IND
26	Amposta	PuertoRico	TEJ
27	Arabi	Egypt	ADMIX
28	AsseYPung	Philippines	TRJ
29	Aswina330	Bangladesh	AUS
30	Azerbaidjanica	Azerbaijan	TEJ
31	Baber	India	TEJ
32	BaghlaniNangarhar	Afghanistan	TEJ
33	Bahia	Spain	TEJ
35	Baldo	Italy	ADMIX
36	Basmati	Pakistan	AROMATIC
37	Basmati217	India	TRJ
38	Bellardone	France	TEJ
39	Benllok	Peru	TEJ
40	Berenj	Afghanistan	ADMIX
41	BicoBranco	Brazil	AROMATIC
42	Binulawan	Philippines	IND
43	Biser1	Bulgaria	TEJ
44	BJ1	India	AUS
45	BlackGora	India	AUS
46	BlueRose	Louisiana	ADMIX
47	BoaVista	ElSalvador	TRJ
48	Bombilla	Spain	TEJ
49	Bombon	Spain	TEJ
50	BritishHondurasCreole	Belize	TRJ
51	BulZo	SouthKorea	TEJ
52	Bulgare	France	TEJ
53	CanellaDeFerro	Brazil	TRJ
54	Caucasica	FormerSovietUnion	TEJ
55	Cenit	Argentina	TRJ
56	Chau	Vietnam	IND
57	Chibica	Mozambique	TEJ
58	ChiemChanh	Vietnam	IND
59	China1039	China	IND
60	Chinese	China	TEJ
61	Chuan4	Taiwan	AUS
62	CO18	India	IND
63	Coarse	Pakistan	AUS
64	Cocodrie	UnitedStates	TRJ
65	Coppocina	Bulgaria	TRJ
66	Creole	Belize	TRJ
67	CriolloLaFria	Venezuela	IND
68	Cuba65	Cuba	TRJ
69	Cybonnet	UnitedStates	TRJ
70	Dam	Thailand	ADMIX
71	Darmali	Nepal	ADMIX
72	Dawebyan	Myanmar	IND
73	DeeGeoWooGen	Taiwan	IND
74	Della	UnitedStates	TRJ
75	Delrex	UnitedStates	TRJ
76	Deokjeokjodo	Korea	TEJ
77	Desvauxii	FormerSovietUnion	TEJ
78	DhalaShaitta	Bangladesh	AUS
79	Djimoron	Guinea	IND
80	DobleCarolinaRinaldoBarsani	Uruguay	ADMIX
81	Dom-sufid	Iran	AROMATIC
82	DomZard	Iran	AROMATIC
83	Dosel	Spain	TEJ
84	DouradoAgulha	Brazil	TRJ
85	EarlyWataribune	Japan	TEJ
86	Edith	UnitedStates	TRJ
87	EdomenScented	Japan	TEJ
88	EMATAA16-34	Myanmar	IND
89	Estrela	Colombia	ADMIX
90	Firooz	Iran	AROMATIC
91	Fortuna	UnitedStates	TRJ
92	FossaAv	BurkinaFaso	TRJ
93	GambiakaSebela	Mali	TEJ
94	GhatiKammaNangarhar	Afghanistan	AUS
95	Ghorbhai	Bangladesh	AUS
96	GogoLempuk	Indonesia	TRJ
97	Goria	Bangladesh	AUS
98	GotakGatik	Indonesia	ADMIX
99	Guan-Yin-Tsan	China	IND
100	Guineandao	Guinea	ADMIX
101	HalwaGoseRed	Iraq	AUS
102	Hatsunishiki	Japan	TEJ
103	Hiderisirazu	Japan	ADMIX
104	Honduras	Honduras	TRJ
105	HsiaChiohKehTu	Taiwan	IND
106	HuLoTao	China	TEJ
107	HunanEarlyDwarfNo.3	China	IND
108	IguapeCateto	Haiti	TRJ
109	IR36	Philippines	IND
110	IR8	Philippines	IND
111	IR-44595	Nepal	IND
112	Jamir	Bangladesh	AUS
113	Jaya	India	IND
114	JC149	India	IND
115	Jhona349	India	AUS
116	Jouiku393G	Japan	TEJ
117	Kachilon	Bangladesh	AUS
118	Kalamkati	India	AUS
119	KalubalaVee	SriLanka	AUS
120	Kamenoo	Japan	TEJ
121	Kaniranga	Indonesia	TRJ
122	Karabaschak	Bulgaria	TEJ
123	Karkati87	Bangladesh	AUS
124	Kaukau	Mali	AUS
125	KaukkyiAni	Myanmar	ADMIX
126	KhaoGaew	Thailand	AUS
127	KhaoTotLong227	Thailand	AUS
128	Kiang-Chou-Chiu	Taiwan	IND
129	Kihogo	Tanzania	TEJ
130	Kinastano	Philippines	TRJ
131	Kitrana508	Madagascar	AROMATIC
132	KonSuito	Mongolia	TEJ
133	Koshihikari	Japan	TEJ
134	L-202	UnitedStates_CA	TRJ
135	LAC23	Liberia	TRJ
136	LadyWrightSeln	UnitedStates	TRJ
137	LaGrue	UnitedStates	TRJ
138	LD24	SriLanka	IND
139	Lemont	UnitedStates	TRJ
140	LeuangHawn	Thailand	TEJ
141	LeungPratew	Thailand	IND
142	Li-Jiang-Xin-Tuan-Hei-Gu	China	ADMIX
143	Lomello	Thailand	TEJ
144	LukTakhar	Afghanistan	TEJ
145	Lusitano	Portugal	TEJ
146	M.Blatec	Macedonia	ADMIX
147	M202	UnitedStates-CA	ADMIX
148	Mansaku	Japan	TEJ
149	Maratelli	Italy	TEJ
150	Melanotrix	Tajikistan	TEJ
151	MingHui	China	IND
52	Mudgo	India	IND
153	Niquen	Chile	TRJ
154	Nira	UnitedStates	IND
155	Norin20	Japan	TEJ
156	Nova	UnitedStates	ADMIX
157	O-Luen-Cheung	Taiwan	IND
158	Okshitmayin	Myanmar	ADMIX
159	Oro	Chile	TEJ
160	OryzicaLlanos5	Colombia	IND
161	OS6(WC10296)	Zaire	TRJ
162	Osogovka	Macedonia	ADMIX
163	Ostiglia	Argentina	TEJ
164	PadiKasalle	Indonesia	TRJ
165	PadiPagalong	Malaysia	TRJ
166	Pagaiyahan	Taiwan	IND
167	PaiHokGlutinous	HongKong	IND
168	Palmyra	UnitedStates	ADMIX
169	Pao-Tou-Hung	China	IND
170	Pappaku	Taiwan	IND
171	ParaibaChinesNova	Brazil	IND
172	PateBlancMn1	CoteD'Ivoire	TRJ
173	Patna	Morocco	TEJ
174	PatoDeGallinazo	Australia	ADMIX
175	PaungMalaung	Myanmar	AUS
176	Peh-Kuh	Taiwan	IND
177	Peh-Kuh-Tsao-Tu	Taiwan	IND
178	Phudugey	Bhutan	AUS
179	Pirinae69	FormerYugoslavia	ADMIX
180	Pratao	Brazil	TRJ
181	PrianoGuaira	Brazil	TRJ
182	RadinEbos33	Malaysia	IND
183	Rathuwee	SriLanka	IND
184	Razza77	Italy	TEJ
185	RikutoKemochi	Japan	TEJ
186	RikutoNorin21	Japan	ADMIX
187	RinaldoBersani	Italy	ADMIX
188	RizLocal	BurkinaFaso	ADMIX
189	Rojofotsy738	Madagascar	ADMIX
190	Romanica	Hungary	TEJ
191	RTS4	Vietnam	IND
192	SabIni	Egypt	TEJ
193	Sabharaj	Bangladesh	IND
194	SadriBelyi	Azerbaijan	AROMATIC
195	SadriTorMisri	Iran	ADMIX
196	Saku	Mongolia	ADMIX
197	Sanbyang-Daeme	Korea	ADMIX
198	SanthiSufaid	Pakistan	AUS
199	Saraya	Fiji	AUS
200	Sathi	Pakistan	AUS
201	Saturn	UnitedStates	ADMIX
202	SeratoesHari	Indonesia	IND
203	Shai-Kuh	China	IND
204	Shangyu394	China	TEJ
205	ShimBalte	Iraq	AUS
206	Shinriki	Japan	TEJ
207	Shirkati	Afghanistan	AUS
208	Shirogane	Japan	TEJ
209	Shoemed	UnitedStates	TEJ
210	ShortGrain	Thailand	IND
211	Sigadis	Indonesia	IND
212	SinampagaSelection	Philippines	TRJ
213	SintaneDiofor	BurkinaFaso	IND
214	Sitpwa	Myanmar	TEJ
215	SriMalaysiaDua	Malaysia	TEJ
216	Sufaid	Pakistan	AUS
217	Sultani	Egypt	TRJ
218	Sundensis	Kazakhstan	IND
219	Suweon	Korea	TEJ
220	SzeGuenZim	China	IND
221	TaHungKu	China	TEJ
222	TaMaoTsao	China	TEJ
223	Taducan	Philippines	IND
224	TaichungNative1	Taiwan	IND
225	TainanIku487	Taiwan	TEJ
226	Tainan-IkuNo.512	Taiwan	TEJ
227	Taipei309	Taiwan	TEJ
228	Tchibanga	Gabon	IND
229	TeQing	China	IND
230	TiaBura	Indonesia	TRJ
231	TKM6	India	IND
232	TokyoShinoMochi	Japan	ADMIX
233	Tondok	Indonesia	TRJ
234	Tox782-20-1	Nigeria	TRJ
235	Trembese	Indonesia	TRJ
236	TriompheDuMaroc	Morocco	TEJ
237	TropicalRice	Ecuador	TEJ
238	Tsipala421	Madagascar	ADMIX
239	Uzbekskij2	Uzbekistan	TEJ
240	VaryVato462	Madagascar	ADMIX
241	Vavilovi	Kazakhstan	TEJ
242	Vialone	Italy	TEJ
243	VictoriaF.A.	Argentina	ADMIX
244	WIR3764	Uzbekistan	TEJ
245	YabaniMontakhab7	Egypt	TEJ
246	Yodanya	Myanmar	IND
247	Zhenshan2	China	IND
248	KhaoPahkMaw	Thailand	AUS
249	WC6	China	TEJ
250	BlueRoseSupreme	UnitedStates	ADMIX
251	Manzano	Zaire	TRJ
252	Nortai	UnitedStates	ADMIX
253	Romeo	Italy	TEJ
254	Sinaguing	Philippines	TRJ
255	SungLiao2	China	TEJ
256	RTS12	Vietnam	IND
257	Shuang-Chiang	Taiwan	IND
258	Jasmine85	Philippines	IND
259	Wanica	Suriname	TRJ
260	Beonjo	SouthKorea	TEJ
261	HaginomaeMochi	Japan	TEJ
262	KawLuyoeng	Thailand	TEJ
263	Kibi	Japan	TEJ
264	TamCau9A	Vietnam	IND
265	Agostano	Italy	TEJ
266	Arias	Indonesia	TRJ
267	Early	UnitedStates	ADMIX
268	Guatemala1021	Guatemala	TRJ
269	Heukgyeong	SouthKorea	TEJ
270	Jefferson	UnitedStates	TRJ
271	Katy	UnitedStates	TRJ
272	Kaybonnet	UnitedStates	TRJ
273	Lambayeque1	Peru	AROMATIC
274	Pecos	UnitedStates	ADMIX
275	Rosemont	UnitedStates	TRJ
276	Saber	UnitedStates	TRJ
277	Stegaru65	Romania	TEJ
278	Pankhari203	India	AROMATIC
279	Bengal	UnitedStates	ADMIX
280	Gyehwa3	SouthKorea	TEJ
281	Panda	UnitedStates	ADMIX
282	SmlKapuri	Suriname	TEJ
283	NPE835	Pakistan	TEJ

## Sheet: Supplementary Table S2
Supplementary Table S2. Correlation between total and α- tocopherol.
	Alpha	Total
Alpha	1
Total	0.972497	1

## Sheet: Supplementary Table S3
Supplementary Table S3. QTLs identified for tocopherols content in rice grain using GWAS.
QTL	CHROM	POS	REF	ALT	Effect	SE	p	negative log10(p)	PVE%
qAlph3.1	3	34602868	T	A	7.75243	1.56557	1.77e-06	5.7	22
qAlph8.1	8	23623865	C	T	7.65224	1.58766	3.18e-06	5.5	25
qAlph8.2	8	27677459	A	G	7.65224	1.58766	3.18e-06	5.5	22
qAlph2.1	2	9494515	A	G	2.25101	0.558398	8.38e-05	4	7
qAlph1.1	1	42610011	A	G	3.39534	0.844959	8.81e-05	4	10
qAlph6.1	6	14006104	C	T	3.13566	0.761654	5.99e-05	4	10
qTot3.1	3	34602868	T	A	8.30666	1.60193	6.1e-07	6.2	23
qTot8.1	8	23623865	C	T	8.15443	1.62639	1.34e-06	5.9	26
qTot8.2	8	27209766	T	C	4.75239	1.17558	8.02e-05	4.1	24
qTot1.1	1	42152363	A	T	3.09408	0.721662	3.03e-05	4.5	10
qTot6.1	6	14006104	C	T	3.30175	0.78228	3.97e-05	4.4	10
qTol2.1	2	4662451	A	G	-2.91974	0.700327	4.87e-05	4.3	9
qTot8.3	8	21805051	C	A	5.57087	1.3607	6.56e-05	4.2	18

## Sheet: Supplementary Table S4
Supplementary Table S4. Primary identified TFs in the vicinity of GWAS signals
Trait	Peak marker	QTL	Chr.	Interval position	P-value	TF name
α-tocopherol	id3016979	qAlph3.1	3	34350604-34427704	1.77e-06	Os03g0818700 (MYB transcription factor); Os03g0818800 (AP2/EREBP33); Os03g0820300 (ZFP182); Os03g0820400 (ZFP15)
	id8006747	qAlph8.1	8	23572583-23894602	3.18e-06	Os08g0477900 (bHLH042); Os08g0479400 (OsZHD2); Os08g0481400 (HD-ZIP protein HOX20); Os08g0483900 (OsbHLH047)
	id8007643	qAlph8.2	8	27486398-28321217	3.18e-06	Os08g0548000 (Myb transcription factor); Os08g0549600 (b-ZIP69); Os08g0554400 (Zinc finger OsIDD6); Os08g0555700 (Zinc finger C2H2); Os08g0562200 (NAC40); Os08g0563400 (Similar to LOB domain protein 17); Os08g0565200 (ERF44)
	id2004522	qAlph2.1	2	8879339-9535430	5.73e-05	Os02g0257500 (bHLH053); Os02g0265200 (WRKY 39); Os02g0266800 (OsbZIP20)
	id1027324	qAlph1.1	1	41971444	5.9e-05	Os01g0952800 (OsbHLH056)
	id6008406	qAlph6.1	6	13804017-14078261	5.99e-05	Os06g0344900 (NAC 92); Os06g0347700 (MADS-box 59); Os06g0348800 (OsGLK1)
Total tocopherol	id3016979	qTot3.1	3	34350604-34427704	6.1e-07	Os03g0818700 (MYB transcription factor); Os03g0818800 (AP2/EREBP33); Os03g0820300 (ZFP182); Os03g0820400 (zinc finger protein ZFP15)
	id8006747	qTot8.1	8	23572583-23894602	1.34e-06	Os08g0477900 (bHLH 042); Os08g0479400 (OsZHD2); Os08g0481400 (Oshox20); Os08g0483900 (OsbHLH047)
	id8007643	qTot8.2	8	27237307-28321217	1.34e-06	Os08g0543900 (OsbZIP68) Os08g0546800 (HSF21); Os08g0565200 (ERF44); Os08g0562200 (NAC40); Os08g0555700 (Zinc finger C2H2); Os08g0554400 (OsIDD6 Zinc finger); Os08g0549600 (BZIP69); Os08g0548000 (Myb transcription factor)
	id1027324	qTot1.1	1	41971444-43194032	3.03e-05	Os01g0952800 (bHLH056); Os01g0972800 (WRKY17); Os01g0975300 (MYB 48); Os01g0976800 (Zinc finger NHR/GATA); Os01g0977300 (Similar to MYB-related protein)
	id6008406	qTot6.1	6	13804017-14078261	3.97e-05	Os06g0344900 (ONAC92); Os06g0347700 (OsMADS59); Os06g0348800 (OsGlk1)
	id2002458	qTol2.1	2	4544306-4867738	4.87e-05	Os02g0181300 (WRKY 71); Os02g0182800 (Homeobox protein HOS58); Os02g0187700 (XMYB1)
	id8006210	qTot8.3	8	22012617-22236504	6.56e-05	Os08g0450900 (SANT domain); Os08g0454000 (ERF12)

## Sheet: Supplementary Table S5
Supplementary Table S5. Promoter analysis of the candidate genes in the close vicinity of detected GWAS signals.
Sequence ID	TFBS ID	Posistion	Strand	Similar Score	Binding sequence	TF family	TF ID
vte1	TFmatrixID_0055	1317	-	0.993	agggCGGCGg	AP2	Os06g0604000;Os02g0202000;Os02g0797100;Os04g0655700;Os06g0181700
vte1	TFmatrixID_0059	1317	-	0.992	agggCGGCGg	AP2	Os06g0691100;Os08g0537900;Os09g0457900;Os11g0168500;Os01g0797600;Os01g0868000;LOC_Os02g06330;Os02g0189500;Os02g0520000;Os02g0546600;Os04g0399800;Os04g0610400;Os04g0669200;Os05g0437050;Os05g0497300
vte1	TFmatrixID_0062	1316	-	0.992	cagggCGGCG	AP2	Os06g0691100;Os07g0669500;Os08g0537900;Os09g0287000;Os10g0390800;Os11g0168500;Os01g0797600;Os01g0868000;LOC_Os02g06330;Os02g0189500;Os02g0520000;Os02g0546600;LOC_Os02g34270;Os02g0594300;Os03g0183200;Os04g0399800;Os04g0429050;Os04g0610400;Os04g0669200;Os05g0361700;Os05g0437050;Os05g0497300
vte1	TFmatrixID_0068	358	-	0.988	gGCCGGca	AP2	Os07g0410300;LOC_Os08g44960;Os09g0571700;Os09g0572000;LOC_Os10g30840;Os10g0562900;Os01g0752500;Os02g0654700;Os03g0150200;Os03g0860100;Os04g0257500;Os04g0546800;Os05g0448675;Os05g0564700
vte1	TFmatrixID_0069	1318	-	0.989	gggCGGCGgg	AP2	Os06g0222400;Os07g0617000;Os07g0674800;Os08g0537900;Os09g0287000;Os09g0369000;Os09g0434500;Os09g0457900;Os10g0390800;LOC_Os10g30840;Os10g0562900;Os11g0168500;Os01g0313300;Os01g0752500;Os01g0797600;Os01g0868000;Os02g0521100;Os02g0546600;LOC_Os02g34270;Os02g0654700;Os02g0655200;Os02g0752800;Os02g0764700;Os03g0150200;Os03g0183000;Os03g0183300;Os03g0191900;Os03g0341000;Os04g0257500;Os04g0398000;Os04g…
vte1	TFmatrixID_0070	227	+	0.989	tggCCGACc	AP2	Os06g0553700;Os10g0523900;Os10g0560700;Os02g0231000;Os02g0656600;Os02g0657000;Os04g0549700;Os04g0549800;Os04g0550200
vte1	TFmatrixID_0075	1319	-	1	ggCGGCGg	AP2	Os06g0691100;Os07g0617000;Os07g0669500;Os07g0674800;Os08g0537900;Os09g0287000;Os09g0457900;Os10g0390800;LOC_Os10g30840;Os10g0562900;Os11g0168500;Os01g0224100;Os01g0313300;Os01g0797600;Os01g0868000;LOC_Os02g06330;Os02g0189500;Os02g0520000;Os02g0521100;Os02g0546600;LOC_Os02g34270;Os02g0594300;Os02g0655200;Os02g0764700;Os03g0150200;Os03g0183200;Os03g0341000;Os04g0257500;Os04g0398000;Os04g0399800;Os0…
vte1	TFmatrixID_0078	1319	-	1	gGCGGCgg	AP2	Os07g0410300;LOC_Os08g44960;Os09g0457900;Os09g0571700;Os10g0390800;LOC_Os10g30840;Os10g0562900;Os01g0224100;Os01g0657400;Os01g0752500;Os01g0868000;Os02g0546600;Os02g0654700;Os02g0655200;Os03g0150200;Os03g0815800;Os03g0860100;Os04g0257500;Os04g0429050;Os04g0546800;Os04g0547500;Os04g0547600;Os04g0610400;Os05g0437050;Os05g0564700
vte1	TFmatrixID_0081	357	+	0.991	agGCCGGcaa	AP2	Os09g0571700;Os10g0390800;LOC_Os10g30840;Os10g0562900;Os01g0752500;Os01g0868000;Os02g0654700;Os02g0655200;Os03g0150200;Os03g0183000;Os03g0860100;Os04g0257500;Os04g0429050;Os04g0546800;Os04g0547500;Os04g0547600;Os05g0437050;Os05g0564700
vte1	TFmatrixID_0081	357	-	0.981	aggCCGGCaa	AP2	Os09g0571700;Os10g0390800;LOC_Os10g30840;Os10g0562900;Os01g0752500;Os01g0868000;Os02g0654700;Os02g0655200;Os03g0150200;Os03g0183000;Os03g0860100;Os04g0257500;Os04g0429050;Os04g0546800;Os04g0547500;Os04g0547600;Os05g0437050;Os05g0564700
vte1	TFmatrixID_0082	1318	-	1	gggCGGCGg	AP2	Os06g0222400;Os07g0674800;Os08g0537900;Os09g0571700;LOC_Os10g30840;Os10g0562900;Os11g0168500;Os01g0313300;Os01g0752500;Os01g0868000;Os02g0521100;Os02g0546600;LOC_Os02g34270;Os02g0654700;Os02g0655200;Os02g0752800;Os03g0150200;Os03g0341000;Os03g0860100;Os04g0257500;Os04g0398000;Os04g0429050;Os04g0546800;Os04g0547500;Os04g0547600;Os05g0437050;Os05g0564700
vte1	TFmatrixID_0083	1319	-	1	gGCGGCgg	AP2	Os09g0434500;Os11g0168500;Os01g0224100;Os01g0657400
vte1	TFmatrixID_0085	228	+	0.975	ggCCGACcga	AP2; ERF	Os06g0553700;Os10g0560700;Os11g0242300;Os02g0231000;Os02g0558700;Os02g0656600;Os02g0657000;Os04g0430800;Os04g0549700;Os04g0549800;Os04g0550200;Os06g0127100
vte1	TFmatrixID_0087	1319	-	0.99	ggCGGCGg	AP2	Os08g0408500;Os09g0369000;Os11g0168500;Os01g0224100;Os01g0657400;Os03g0183200;Os03g0191900;Os04g0429050
vte1	TFmatrixID_0100	1317	-	0.996	agggCGGCGg	AP2	Os07g0617000;Os07g0674800;Os08g0537900;Os09g0434500;Os09g0457900;LOC_Os10g30840;Os10g0562900;Os11g0168500;Os01g0313300;Os01g0752500;Os01g0797600;Os01g0868000;Os02g0521100;Os02g0546600;LOC_Os02g34270;Os02g0654700;Os02g0655200;Os02g0764700;Os03g0150200;Os03g0183000;Os03g0183300;Os03g0341000;Os04g0257500;Os04g0398000;Os04g0429050;Os04g0546800;Os05g0437050;Os05g0564700
vte1	TFmatrixID_0102	1318	-	0.998	ggGCGGCggg	AP2	Os06g0222400;Os07g0674800;Os08g0537900;LOC_Os10g30840;Os10g0562900;Os11g0168500;Os01g0752500;Os01g0868000;Os02g0521100;Os02g0546600;LOC_Os02g34270;Os02g0654700;Os02g0655200;Os02g0752800;Os03g0150200;Os03g0341000;Os03g0860100;Os04g0257500;Os04g0398000;Os04g0429050;Os04g0546800;Os04g0547500;Os04g0547600;Os05g0437050;Os05g0564700
vte1	TFmatrixID_0103	1318	-	0.999	gggCGGCGgg	AP2	Os08g0537900;Os09g0571700;LOC_Os10g30840;Os10g0562900;Os11g0168500;Os01g0657400;Os01g0752500;Os01g0797600;Os01g0868000;Os02g0521100;Os02g0546600;Os02g0654700;Os02g0655200;Os03g0150200;Os03g0183000;Os03g0191900;Os03g0815800;Os03g0860100;Os04g0257500;Os04g0398000;Os04g0546800;Os04g0547500;Os04g0547600;Os05g0437050;Os05g0497300;Os05g0564700
vte1	TFmatrixID_0106	358	+	0.966	gGCCGGca	AP2	Os08g0537900;Os09g0571700;LOC_Os10g30840;Os10g0562900;Os01g0224100;Os01g0657400;Os01g0752500;Os01g0797600;Os01g0868000;Os02g0521100;Os02g0546600;Os02g0654700;Os02g0655200;Os03g0150200;Os04g0257500;Os04g0546800;Os04g0547500;Os04g0547600;Os05g0437050;Os05g0497300
vte1	TFmatrixID_0106	358	-	0.944	ggCCGGCa	AP2	Os08g0537900;Os09g0571700;LOC_Os10g30840;Os10g0562900;Os01g0224100;Os01g0657400;Os01g0752500;Os01g0797600;Os01g0868000;Os02g0521100;Os02g0546600;Os02g0654700;Os02g0655200;Os03g0150200;Os04g0257500;Os04g0546800;Os04g0547500;Os04g0547600;Os05g0437050;Os05g0497300
vte1	TFmatrixID_0107	1318	-	0.999	gggCGGCGg	AP2	Os08g0408500;Os09g0369000;Os10g0390800;Os11g0168500;Os01g0224100;Os01g0657400;Os01g0868000;Os03g0191900;Os03g0815800;Os05g0437050;Os06g0160500
vte1	TFmatrixID_0109	227	+	0.901	tggCCGACcg	AP2; ERF	Os02g0677300;Os06g0127100
vte1	TFmatrixID_0127	345	+	0.954	cCAACAta	AP2; B3; RAV	Os01g0693400
vte1	TFmatrixID_0133	767	-	0.999	TTTTTtccc	AT-Hook	Os01g0835600
vte1	TFmatrixID_0133	768	-	0.999	TTTTTccct	AT-Hook	Os01g0835600
vte1	TFmatrixID_0133	1140	-	0.999	TTTTTtctt	AT-Hook	Os01g0835600
vte1	TFmatrixID_0146	973	+	0.988	tgagATAAT	AT-Hook	Os07g0184800
vte1	TFmatrixID_0148	764	-	0.998	tATTTTtt	AT-Hook	Os02g0824300;Os06g0326000;Os07g0184800;Os08g0512400;Os09g0491708
vte1	TFmatrixID_0148	806	-	1	aATTTTtt	AT-Hook	Os02g0824300;Os06g0326000;Os07g0184800;Os08g0512400;Os09g0491708
vte1	TFmatrixID_0148	1221	-	1	aATTTTtt	AT-Hook	Os02g0824300;Os06g0326000;Os07g0184800;Os08g0512400;Os09g0491708
vte1	TFmatrixID_0152	806	-	1	AATTTtt	AT-Hook	Os06g0326000
vte1	TFmatrixID_0152	1221	-	1	AATTTtt	AT-Hook	Os06g0326000
vte1	TFmatrixID_0156	1070	-	0.956	ttTGTCGta	B3; ARF	Os02g0141100;Os02g0164900;Os04g0664400;Os04g0671900;Os06g0196700;Os06g0677800;Os06g0702600;Os08g0520500;Os11g0523800;Os12g0613700
vte1	TFmatrixID_0157	1289	-	0.992	aCACGTg	bHLH	Os01g0235700;Os01g0705700;Os03g0671000;Os08g0543700;Os09g0519100;Os10g0575000
vte1	TFmatrixID_0157	1290	+	0.989	cACGTGa	bHLH	Os01g0235700;Os01g0705700;Os03g0671000;Os08g0543700;Os09g0519100;Os10g0575000
vte1	TFmatrixID_0158	1289	+	0.995	aCACGTga	bHLH	Os01g0235700;Os01g0705700;Os01g0928000;Os03g0671000;Os08g0543700;Os09g0519100;Os10g0575000;Os11g0523700
vte1	TFmatrixID_0158	1289	-	0.98	acACGTGa	bHLH	Os01g0235700;Os01g0705700;Os01g0928000;Os03g0671000;Os08g0543700;Os09g0519100;Os10g0575000;Os11g0523700
vte1	TFmatrixID_0159	109	-	0.984	cCACGTt	bHLH	LOC_Os01g18290;Os02g0805250;Os03g0639300;Os03g0782500;Os04g0618600;Os05g0139100;Os06g0164400;Os07g0143200;Os10g0556200;Os12g0610200
vte1	TFmatrixID_0159	181	+	0.982	gACGTGg	bHLH	LOC_Os01g18290;Os02g0805250;Os03g0639300;Os03g0782500;Os04g0618600;Os05g0139100;Os06g0164400;Os07g0143200;Os10g0556200;Os12g0610200
vte1	TFmatrixID_0159	750	+	0.982	gACGTGg	bHLH	LOC_Os01g18290;Os02g0805250;Os03g0639300;Os03g0782500;Os04g0618600;Os05g0139100;Os06g0164400;Os07g0143200;Os10g0556200;Os12g0610200
vte1	TFmatrixID_0159	1244	+	0.982	aACGTGa	bHLH	LOC_Os01g18290;Os02g0805250;Os03g0639300;Os03g0782500;Os04g0618600;Os05g0139100;Os06g0164400;Os07g0143200;Os10g0556200;Os12g0610200
vte1	TFmatrixID_0159	1289	-	0.997	aCACGTg	bHLH	LOC_Os01g18290;Os02g0805250;Os03g0639300;Os03g0782500;Os04g0618600;Os05g0139100;Os06g0164400;Os07g0143200;Os10g0556200;Os12g0610200
vte1	TFmatrixID_0159	1290	+	0.998	cACGTGa	bHLH	LOC_Os01g18290;Os02g0805250;Os03g0639300;Os03g0782500;Os04g0618600;Os05g0139100;Os06g0164400;Os07g0143200;Os10g0556200;Os12g0610200
vte1	TFmatrixID_0159	1346	+	0.982	gACGTGg	bHLH	LOC_Os01g18290;Os02g0805250;Os03g0639300;Os03g0782500;Os04g0618600;Os05g0139100;Os06g0164400;Os07g0143200;Os10g0556200;Os12g0610200
vte1	TFmatrixID_0160	1288	+	0.997	gaCACGTgac	bHLH	Os01g0235700;Os01g0705700;Os03g0671000;Os08g0543700;Os09g0519100;Os10g0575000
vte1	TFmatrixID_0160	1288	-	0.997	gacACGTGac	bHLH	Os01g0235700;Os01g0705700;Os03g0671000;Os08g0543700;Os09g0519100;Os10g0575000
vte1	TFmatrixID_0161	109	-	0.982	cCACGTtgg	bHLH	Os01g0915600;Os02g0564700;Os02g0705500;Os03g0231950;Os03g0728900;Os03g0802900;Os04g0350700;Os05g0103000;Os06g0193400;Os06g0275600;Os07g0193800;Os08g0487700;Os08g0524800;Os08g0536800;Os09g0474100;Os09g0501600;Os09g0510500
vte1	TFmatrixID_0161	1288	+	0.999	gacACGTGa	bHLH	Os01g0915600;Os02g0564700;Os02g0705500;Os03g0231950;Os03g0728900;Os03g0802900;Os04g0350700;Os05g0103000;Os06g0193400;Os06g0275600;Os07g0193800;Os08g0487700;Os08g0524800;Os08g0536800;Os09g0474100;Os09g0501600;Os09g0510500
vte1	TFmatrixID_0161	1289	-	0.999	aCACGTgac	bHLH	Os01g0915600;Os02g0564700;Os02g0705500;Os03g0231950;Os03g0728900;Os03g0802900;Os04g0350700;Os05g0103000;Os06g0193400;Os06g0275600;Os07g0193800;Os08g0487700;Os08g0524800;Os08g0536800;Os09g0474100;Os09g0501600;Os09g0510500
vte1	TFmatrixID_0162	1288	+	0.997	gaCACGTgac	bHLH	Os02g0726700;Os08g0490000;Os09g0475400
vte1	TFmatrixID_0162	1288	-	0.997	gacACGTGac	bHLH	Os02g0726700;Os08g0490000;Os09g0475400
vte1	TFmatrixID_0163	1286	-	0.935	gtgaCACGTgac	bHLH	Os01g0915600;Os02g0564700;Os02g0705500;Os03g0231950;Os03g0728900;Os03g0802900;Os04g0350700;Os05g0103000;Os06g0193400;Os06g0275600;Os07g0193800;Os08g0487700;Os08g0524800;Os08g0536800;Os09g0474100;Os09g0501600;Os09g0510500
vte1	TFmatrixID_0163	1288	+	0.94	gacACGTGacga	bHLH	Os01g0915600;Os02g0564700;Os02g0705500;Os03g0231950;Os03g0728900;Os03g0802900;Os04g0350700;Os05g0103000;Os06g0193400;Os06g0275600;Os07g0193800;Os08g0487700;Os08g0524800;Os08g0536800;Os09g0474100;Os09g0501600;Os09g0510500
vte1	TFmatrixID_0164	1288	+	0.999	gaCACGTgac	bHLH	LOC_Os01g18290;Os02g0705500;Os02g0805250;Os03g0231950;Os03g0639300;Os03g0782500;Os04g0350700;Os04g0618600;Os05g0139100;Os06g0164400;Os07g0143200;Os09g0417400;Os10g0556200;Os12g0610200
vte1	TFmatrixID_0164	1288	-	0.999	gacACGTGac	bHLH	LOC_Os01g18290;Os02g0705500;Os02g0805250;Os03g0231950;Os03g0639300;Os03g0782500;Os04g0350700;Os04g0618600;Os05g0139100;Os06g0164400;Os07g0143200;Os09g0417400;Os10g0556200;Os12g0610200
vte1	TFmatrixID_0165	1289	+	0.967	aCACGTga	bHLH	Os07g0543000
vte1	TFmatrixID_0165	1289	-	0.962	acACGTGa	bHLH	Os07g0543000
vte1	TFmatrixID_0166	1289	+	0.986	aCACGTga	bHLH	LOC_Os01g18290;Os02g0564700;Os02g0805250;Os03g0639300;Os03g0782500;Os04g0618600;Os05g0139100;Os06g0164400;Os06g0193400;Os07g0143200;Os10g0556200;Os12g0610200
vte1	TFmatrixID_0166	1289	-	0.982	acACGTGa	bHLH	LOC_Os01g18290;Os02g0564700;Os02g0805250;Os03g0639300;Os03g0782500;Os04g0618600;Os05g0139100;Os06g0164400;Os06g0193400;Os07g0143200;Os10g0556200;Os12g0610200
vte1	TFmatrixID_0167	1288	+	0.867	gaCACGTgac	bHLH	Os05g0455400;Os07g0543000
vte1	TFmatrixID_0167	1288	-	0.867	gacACGTGac	bHLH	Os05g0455400;Os07g0543000
vte1	TFmatrixID_0168	1288	+	0.997	gaCACGTgac	bHLH	Os01g0235700;Os01g0705700;Os03g0671000;Os08g0543700;Os09g0519100;Os10g0575000
vte1	TFmatrixID_0168	1288	-	0.997	gacACGTGac	bHLH	Os01g0235700;Os01g0705700;Os03g0671000;Os08g0543700;Os09g0519100;Os10g0575000
vte1	TFmatrixID_0169	1288	+	0.999	gaCACGTgac	bHLH	Os01g0915600;Os02g0564700;Os02g0705500;Os03g0231950;Os03g0728900;Os03g0802900;Os04g0350700;Os05g0103000;Os06g0193400;Os06g0275600;Os07g0193800;Os08g0487700;Os08g0524800;Os08g0536800;Os09g0474100;Os09g0501600;Os09g0510500
vte1	TFmatrixID_0169	1288	-	0.999	gacACGTGac	bHLH	Os01g0915600;Os02g0564700;Os02g0705500;Os03g0231950;Os03g0728900;Os03g0802900;Os04g0350700;Os05g0103000;Os06g0193400;Os06g0275600;Os07g0193800;Os08g0487700;Os08g0524800;Os08g0536800;Os09g0474100;Os09g0501600;Os09g0510500
vte1	TFmatrixID_0170	1288	-	0.969	gaCACGTga	bHLH	LOC_Os01g18290;Os02g0805250;Os03g0639300;Os03g0782500;Os04g0618600;Os05g0139100;Os06g0164400;Os07g0143200;Os10g0556200;Os12g0610200
vte1	TFmatrixID_0170	1289	+	0.974	acACGTGac	bHLH	LOC_Os01g18290;Os02g0805250;Os03g0639300;Os03g0782500;Os04g0618600;Os05g0139100;Os06g0164400;Os07g0143200;Os10g0556200;Os12g0610200
vte1	TFmatrixID_0171	1287	+	0.996	tgaCACGTga	bHLH	Os02g0726700;Os08g0490000;Os09g0475400
vte1	TFmatrixID_0171	1289	-	1	acACGTGacg	bHLH	Os02g0726700;Os08g0490000;Os09g0475400
vte1	TFmatrixID_0172	1288	+	0.992	gaCACGTgac	bHLH	Os02g0726700;Os08g0490000;Os09g0475400
vte1	TFmatrixID_0172	1288	-	0.992	gacACGTGac	bHLH	Os02g0726700;Os08g0490000;Os09g0475400
vte1	TFmatrixID_0173	1286	-	0.998	gtgaCACGTg	bHLH	Os01g0235700;Os01g0705700;Os03g0671000;Os08g0543700;Os09g0519100;Os10g0575000
vte1	TFmatrixID_0173	1290	+	0.998	cACGTGacga	bHLH	Os01g0235700;Os01g0705700;Os03g0671000;Os08g0543700;Os09g0519100;Os10g0575000
vte1	TFmatrixID_0174	67	-	0.75	acaCATGC	bHLH	Os01g0915600;Os02g0564700;Os02g0705500;Os03g0231950;Os03g0728900;Os03g0802900;Os04g0350700;Os05g0103000;Os06g0193400;Os06g0275600;Os07g0193800;Os08g0487700;Os08g0524800;Os08g0536800;Os09g0417400;Os09g0474100;Os09g0501600;Os09g0510500
vte1	TFmatrixID_0174	1289	+	0.75	ACACGtga	bHLH	Os01g0915600;Os02g0564700;Os02g0705500;Os03g0231950;Os03g0728900;Os03g0802900;Os04g0350700;Os05g0103000;Os06g0193400;Os06g0275600;Os07g0193800;Os08g0487700;Os08g0524800;Os08g0536800;Os09g0417400;Os09g0474100;Os09g0501600;Os09g0510500
vte1	TFmatrixID_0174	1289	-	0.75	acaCGTGA	bHLH	Os01g0915600;Os02g0564700;Os02g0705500;Os03g0231950;Os03g0728900;Os03g0802900;Os04g0350700;Os05g0103000;Os06g0193400;Os06g0275600;Os07g0193800;Os08g0487700;Os08g0524800;Os08g0536800;Os09g0417400;Os09g0474100;Os09g0501600;Os09g0510500
vte1	TFmatrixID_0175	1288	+	0.998	gaCACGTgac	bHLH	Os05g0455400;Os07g0543000;Os08g0138500
vte1	TFmatrixID_0175	1288	-	0.998	gacACGTGac	bHLH	Os05g0455400;Os07g0543000;Os08g0138500
vte1	TFmatrixID_0177	1288	+	0.996	gaCACGTgac	bHLH	LOC_Os01g18290;Os01g0915600;Os02g0564700;Os02g0705500;Os02g0795800;Os02g0805250;Os03g0231950;Os03g0639300;Os03g0728900;Os03g0782500;Os03g0797600;Os03g0802900;Os04g0350700;Os04g0618600;Os05g0103000;Os05g0139100;Os06g0164400;Os06g0184000;Os06g0193400;Os06g0275600;Os07g0143200;Os07g0193800;Os08g0487700;Os08g0524800;Os08g0536800;Os09g0417400;Os09g0474100;Os09g0487900;Os09g0501600;Os09g0510500;Os10g05…
vte1	TFmatrixID_0177	1288	-	0.996	gacACGTGac	bHLH	LOC_Os01g18290;Os01g0915600;Os02g0564700;Os02g0705500;Os02g0795800;Os02g0805250;Os03g0231950;Os03g0639300;Os03g0728900;Os03g0782500;Os03g0797600;Os03g0802900;Os04g0350700;Os04g0618600;Os05g0103000;Os05g0139100;Os06g0164400;Os06g0184000;Os06g0193400;Os06g0275600;Os07g0143200;Os07g0193800;Os08g0487700;Os08g0524800;Os08g0536800;Os09g0417400;Os09g0474100;Os09g0487900;Os09g0501600;Os09g0510500;Os10g05…
vte1	TFmatrixID_0178	1288	+	0.999	gaCACGTgac	bHLH	Os02g0726700;Os08g0490000;Os09g0475400
vte1	TFmatrixID_0178	1288	-	0.999	gacACGTGac	bHLH	Os02g0726700;Os08g0490000;Os09g0475400
vte1	TFmatrixID_0179	1289	+	0.974	aCACGTga	bHLH	Os01g0915600;Os02g0564700;Os02g0705500;Os03g0231950;Os03g0728900;Os03g0802900;Os04g0350700;Os05g0103000;Os06g0193400;Os06g0275600;Os07g0193800;Os08g0487700;Os08g0524800;Os08g0536800;Os09g0417400;Os09g0474100;Os09g0501600;Os09g0510500
vte1	TFmatrixID_0179	1289	-	0.975	acACGTGa	bHLH	Os01g0915600;Os02g0564700;Os02g0705500;Os03g0231950;Os03g0728900;Os03g0802900;Os04g0350700;Os05g0103000;Os06g0193400;Os06g0275600;Os07g0193800;Os08g0487700;Os08g0524800;Os08g0536800;Os09g0417400;Os09g0474100;Os09g0501600;Os09g0510500
vte1	TFmatrixID_0181	108	+	0.999	gCCACGttg	bZIP	Os01g0658900;Os02g0128200;Os05g0569300;Os07g0209800;Os12g0233800
vte1	TFmatrixID_0181	180	-	0.987	agaCGTGGa	bZIP	Os01g0658900;Os02g0128200;Os05g0569300;Os07g0209800;Os12g0233800
vte1	TFmatrixID_0181	749	-	0.999	tgaCGTGGc	bZIP	Os01g0658900;Os02g0128200;Os05g0569300;Os07g0209800;Os12g0233800
vte1	TFmatrixID_0181	1345	-	0.987	agaCGTGGa	bZIP	Os01g0658900;Os02g0128200;Os05g0569300;Os07g0209800;Os12g0233800
vte1	TFmatrixID_0181	1399	+	0.998	gCCACGtaa	bZIP	Os01g0658900;Os02g0128200;Os05g0569300;Os07g0209800;Os12g0233800
vte1	TFmatrixID_0182	1285	-	0.998	ggtgaCACGTgac	bZIP	Os01g0859300;Os02g0766700;Os06g0211200;Os09g0456200
vte1	TFmatrixID_0182	1288	+	0.94	gacACGTGacgac	bZIP	Os01g0859300;Os02g0766700;Os06g0211200;Os09g0456200
vte1	TFmatrixID_0182	1396	-	0.918	cccgcCACGTaag	bZIP	Os01g0859300;Os02g0766700;Os06g0211200;Os09g0456200
vte1	TFmatrixID_0183	1287	+	0.995	tgaCACGTgac	bZIP	Os02g0766700;Os06g0211200;Os09g0456200
vte1	TFmatrixID_0183	1288	-	0.933	gacACGTGacg	bZIP	Os02g0766700;Os06g0211200;Os09g0456200
vte1	TFmatrixID_0184	108	-	0.931	gcCACGTtgg	bZIP	Os02g0766700;Os06g0211200;Os09g0456200
vte1	TFmatrixID_0184	179	+	0.95	aagACGTGga	bZIP	Os02g0766700;Os06g0211200;Os09g0456200
vte1	TFmatrixID_0184	748	+	0.916	gtgACGTGgc	bZIP	Os02g0766700;Os06g0211200;Os09g0456200
vte1	TFmatrixID_0184	1288	+	0.974	gacACGTGac	bZIP	Os02g0766700;Os06g0211200;Os09g0456200
vte1	TFmatrixID_0184	1288	-	0.949	gaCACGTgac	bZIP	Os02g0766700;Os06g0211200;Os09g0456200
vte1	TFmatrixID_0184	1344	+	0.95	gagACGTGga	bZIP	Os02g0766700;Os06g0211200;Os09g0456200
vte1	TFmatrixID_0184	1399	-	0.916	gcCACGTaag	bZIP	Os02g0766700;Os06g0211200;Os09g0456200
vte1	TFmatrixID_0185	1	-	0.887	gaTGACGacg	bZIP	Os01g0279900;Os01g0808100;Os01g0859500;Os02g0194900;Os03g0318600;Os04g0637000;Os05g0443850;Os05g0492000;Os06g0265400;Os06g0614100;Os07g0687700;Os08g0176900;Os09g0280500;Os09g0489500;Os11g0152700;Os12g0152900
vte1	TFmatrixID_0185	380	+	0.904	gggCGTCAca	bZIP	Os01g0279900;Os01g0808100;Os01g0859500;Os02g0194900;Os03g0318600;Os04g0637000;Os05g0443850;Os05g0492000;Os06g0265400;Os06g0614100;Os07g0687700;Os08g0176900;Os09g0280500;Os09g0489500;Os11g0152700;Os12g0152900
vte1	TFmatrixID_0185	478	-	0.953	ggTGACGtag	bZIP	Os01g0279900;Os01g0808100;Os01g0859500;Os02g0194900;Os03g0318600;Os04g0637000;Os05g0443850;Os05g0492000;Os06g0265400;Os06g0614100;Os07g0687700;Os08g0176900;Os09g0280500;Os09g0489500;Os11g0152700;Os12g0152900
vte1	TFmatrixID_0185	747	-	0.943	cgTGACGtgg	bZIP	Os01g0279900;Os01g0808100;Os01g0859500;Os02g0194900;Os03g0318600;Os04g0637000;Os05g0443850;Os05g0492000;Os06g0265400;Os06g0614100;Os07g0687700;Os08g0176900;Os09g0280500;Os09g0489500;Os11g0152700;Os12g0152900
vte1	TFmatrixID_0185	1292	-	0.895	cgTGACGacg	bZIP	Os01g0279900;Os01g0808100;Os01g0859500;Os02g0194900;Os03g0318600;Os04g0637000;Os05g0443850;Os05g0492000;Os06g0265400;Os06g0614100;Os07g0687700;Os08g0176900;Os09g0280500;Os09g0489500;Os11g0152700;Os12g0152900
vte1	TFmatrixID_0189	178	-	0.976	aaagACGTGg	bZIP	Os05g0411300;Os07g0644100
vte1	TFmatrixID_0189	747	-	0.998	cgtgACGTGg	bZIP	Os05g0411300;Os07g0644100
vte1	TFmatrixID_0189	1241	-	0.957	tttaACGTGa	bZIP	Os05g0411300;Os07g0644100
vte1	TFmatrixID_0189	1289	+	0.971	aCACGTgacg	bZIP	Os05g0411300;Os07g0644100
vte1	TFmatrixID_0189	1295	-	0.969	gacgACGTGa	bZIP	Os05g0411300;Os07g0644100
vte1	TFmatrixID_0189	1343	-	0.975	agagACGTGg	bZIP	Os05g0411300;Os07g0644100
vte1	TFmatrixID_0189	1400	+	0.972	cCACGTaagc	bZIP	Os05g0411300;Os07g0644100
vte1	TFmatrixID_0190	107	+	0.992	ggCCACGttg	bZIP	Os01g0658900;Os02g0128200;Os05g0569300;Os07g0209800;Os12g0233800
vte1	TFmatrixID_0190	180	-	0.99	agaCGTGGat	bZIP	Os01g0658900;Os02g0128200;Os05g0569300;Os07g0209800;Os12g0233800
vte1	TFmatrixID_0190	749	-	0.999	tgaCGTGGct	bZIP	Os01g0658900;Os02g0128200;Os05g0569300;Os07g0209800;Os12g0233800
vte1	TFmatrixID_0190	1345	-	0.99	agaCGTGGag	bZIP	Os01g0658900;Os02g0128200;Os05g0569300;Os07g0209800;Os12g0233800
vte1	TFmatrixID_0190	1398	+	0.998	cgCCACGtaa	bZIP	Os01g0658900;Os02g0128200;Os05g0569300;Os07g0209800;Os12g0233800
vte1	TFmatrixID_0191	478	-	0.961	ggtGACGTag	B3; bZIP;bZIP	LOC_Os02g22280;Os01g0279900;Os01g0808100;Os01g0859500;Os02g0194900;Os03g0318600;Os04g0637000;Os05g0443850;Os05g0492000;Os06g0265400;Os06g0614100;Os07g0687700;Os08g0176900;Os09g0280500;Os09g0489500;Os11g0152700;Os12g0152900
vte1	TFmatrixID_0191	747	-	0.952	cgtGACGTgg	B3; bZIP;bZIP	LOC_Os02g22280;Os01g0279900;Os01g0808100;Os01g0859500;Os02g0194900;Os03g0318600;Os04g0637000;Os05g0443850;Os05g0492000;Os06g0265400;Os06g0614100;Os07g0687700;Os08g0176900;Os09g0280500;Os09g0489500;Os11g0152700;Os12g0152900
vte1	TFmatrixID_0192	108	+	0.999	gCCACGttg	bZIP	Os01g0658900;Os02g0128200;Os05g0569300;Os07g0209800
vte1	TFmatrixID_0192	180	-	0.99	agaCGTGGa	bZIP	Os01g0658900;Os02g0128200;Os05g0569300;Os07g0209800
vte1	TFmatrixID_0192	749	-	0.999	tgaCGTGGc	bZIP	Os01g0658900;Os02g0128200;Os05g0569300;Os07g0209800
vte1	TFmatrixID_0192	1345	-	0.99	agaCGTGGa	bZIP	Os01g0658900;Os02g0128200;Os05g0569300;Os07g0209800
vte1	TFmatrixID_0192	1399	+	0.999	gCCACGtaa	bZIP	Os01g0658900;Os02g0128200;Os05g0569300;Os07g0209800
vte1	TFmatrixID_0193	67	+	0.75	ACACAtgc	bZIP	Os02g0766700;Os05g0489700;Os06g0211200;Os09g0456200
vte1	TFmatrixID_0193	180	+	0.75	AGACGtgg	bZIP	Os02g0766700;Os05g0489700;Os06g0211200;Os09g0456200
vte1	TFmatrixID_0193	180	-	0.75	agaCGTGG	bZIP	Os02g0766700;Os05g0489700;Os06g0211200;Os09g0456200
vte1	TFmatrixID_0193	246	-	0.75	actGGTGT	bZIP	Os02g0766700;Os05g0489700;Os06g0211200;Os09g0456200
vte1	TFmatrixID_0193	742	+	0.75	AGACGcgt	bZIP	Os02g0766700;Os05g0489700;Os06g0211200;Os09g0456200
vte1	TFmatrixID_0193	742	-	0.75	agaCGCGT	bZIP	Os02g0766700;Os05g0489700;Os06g0211200;Os09g0456200
vte1	TFmatrixID_0193	744	+	0.75	ACGCGtga	bZIP	Os02g0766700;Os05g0489700;Os06g0211200;Os09g0456200
vte1	TFmatrixID_0193	744	-	0.75	acgCGTGA	bZIP	Os02g0766700;Os05g0489700;Os06g0211200;Os09g0456200
vte1	TFmatrixID_0193	1289	+	0.875	ACACGtga	bZIP	Os02g0766700;Os05g0489700;Os06g0211200;Os09g0456200
vte1	TFmatrixID_0193	1289	-	0.875	acaCGTGA	bZIP	Os02g0766700;Os05g0489700;Os06g0211200;Os09g0456200
vte1	TFmatrixID_0193	1345	+	0.75	AGACGtgg	bZIP	Os02g0766700;Os05g0489700;Os06g0211200;Os09g0456200
vte1	TFmatrixID_0193	1345	-	0.75	agaCGTGG	bZIP	Os02g0766700;Os05g0489700;Os06g0211200;Os09g0456200
vte1	TFmatrixID_0194	107	+	0.985	ggcCACGTtg	bZIP	Os01g0658900;Os02g0128200;Os05g0569300;Os07g0209800;Os12g0233800
vte1	TFmatrixID_0194	180	-	0.976	agACGTGgat	bZIP	Os01g0658900;Os02g0128200;Os05g0569300;Os07g0209800;Os12g0233800
vte1	TFmatrixID_0194	749	-	0.998	tgACGTGgct	bZIP	Os01g0658900;Os02g0128200;Os05g0569300;Os07g0209800;Os12g0233800
vte1	TFmatrixID_0194	1287	+	0.962	tgaCACGTga	bZIP	Os01g0658900;Os02g0128200;Os05g0569300;Os07g0209800;Os12g0233800
vte1	TFmatrixID_0194	1345	-	0.976	agACGTGgag	bZIP	Os01g0658900;Os02g0128200;Os05g0569300;Os07g0209800;Os12g0233800
vte1	TFmatrixID_0194	1398	+	0.991	cgcCACGTaa	bZIP	Os01g0658900;Os02g0128200;Os05g0569300;Os07g0209800;Os12g0233800
vte1	TFmatrixID_0195	1	-	0.926	gaTGACGacg	B3; bZIP;bZIP	LOC_Os02g22280;Os01g0279900;Os01g0808100;Os01g0859500;Os02g0194900;Os03g0318600;Os04g0637000;Os05g0443850;Os05g0492000;Os06g0265400;Os06g0614100;Os07g0687700;Os08g0176900;Os09g0280500;Os09g0489500;Os11g0152700;Os12g0152900
vte1	TFmatrixID_0195	380	+	0.934	gggCGTCAca	B3; bZIP;bZIP	LOC_Os02g22280;Os01g0279900;Os01g0808100;Os01g0859500;Os02g0194900;Os03g0318600;Os04g0637000;Os05g0443850;Os05g0492000;Os06g0265400;Os06g0614100;Os07g0687700;Os08g0176900;Os09g0280500;Os09g0489500;Os11g0152700;Os12g0152900
vte1	TFmatrixID_0195	478	-	0.988	ggTGACGtag	B3; bZIP;bZIP	LOC_Os02g22280;Os01g0279900;Os01g0808100;Os01g0859500;Os02g0194900;Os03g0318600;Os04g0637000;Os05g0443850;Os05g0492000;Os06g0265400;Os06g0614100;Os07g0687700;Os08g0176900;Os09g0280500;Os09g0489500;Os11g0152700;Os12g0152900
vte1	TFmatrixID_0195	747	-	0.985	cgTGACGtgg	B3; bZIP;bZIP	LOC_Os02g22280;Os01g0279900;Os01g0808100;Os01g0859500;Os02g0194900;Os03g0318600;Os04g0637000;Os05g0443850;Os05g0492000;Os06g0265400;Os06g0614100;Os07g0687700;Os08g0176900;Os09g0280500;Os09g0489500;Os11g0152700;Os12g0152900
vte1	TFmatrixID_0195	1292	-	0.933	cgTGACGacg	B3; bZIP;bZIP	LOC_Os02g22280;Os01g0279900;Os01g0808100;Os01g0859500;Os02g0194900;Os03g0318600;Os04g0637000;Os05g0443850;Os05g0492000;Os06g0265400;Os06g0614100;Os07g0687700;Os08g0176900;Os09g0280500;Os09g0489500;Os11g0152700;Os12g0152900
vte1	TFmatrixID_0196	479	-	0.995	gTGACGta	B3; bZIP;bZIP	LOC_Os02g22280;Os01g0279900;Os01g0808100;Os01g0859500;Os02g0194900;Os03g0318600;Os04g0637000;Os05g0443850;Os05g0492000;Os06g0265400;Os06g0614100;Os07g0687700;Os08g0176900;Os09g0280500;Os09g0489500;Os11g0152700;Os12g0152900
vte1	TFmatrixID_0196	748	-	0.994	gTGACGtg	B3; bZIP;bZIP	LOC_Os02g22280;Os01g0279900;Os01g0808100;Os01g0859500;Os02g0194900;Os03g0318600;Os04g0637000;Os05g0443850;Os05g0492000;Os06g0265400;Os06g0614100;Os07g0687700;Os08g0176900;Os09g0280500;Os09g0489500;Os11g0152700;Os12g0152900
vte1	TFmatrixID_0197	1	-	0.939	gaTGACGacg	bZIP	Os01g0279900;Os01g0808100;Os01g0859500;Os02g0194900;Os03g0318600;Os04g0637000;Os05g0443850;Os05g0492000;Os06g0265400;Os06g0614100;Os07g0687700;Os08g0176900;Os09g0280500;Os09g0489500;Os11g0152700;Os12g0152900
vte1	TFmatrixID_0197	478	-	0.984	ggTGACGtag	bZIP	Os01g0279900;Os01g0808100;Os01g0859500;Os02g0194900;Os03g0318600;Os04g0637000;Os05g0443850;Os05g0492000;Os06g0265400;Os06g0614100;Os07g0687700;Os08g0176900;Os09g0280500;Os09g0489500;Os11g0152700;Os12g0152900
vte1	TFmatrixID_0197	747	-	0.945	cgTGACGtgg	bZIP	Os01g0279900;Os01g0808100;Os01g0859500;Os02g0194900;Os03g0318600;Os04g0637000;Os05g0443850;Os05g0492000;Os06g0265400;Os06g0614100;Os07g0687700;Os08g0176900;Os09g0280500;Os09g0489500;Os11g0152700;Os12g0152900
vte1	TFmatrixID_0198	177	-	0.961	caaaGACGTgga	bZIP	Os02g0175100;Os03g0796900;Os06g0662200;Os12g0601800
vte1	TFmatrixID_0198	477	-	0.924	gggtGACGTagg	bZIP	Os02g0175100;Os03g0796900;Os06g0662200;Os12g0601800
vte1	TFmatrixID_0198	746	-	0.995	gcgtGACGTggc	bZIP	Os02g0175100;Os03g0796900;Os06g0662200;Os12g0601800
vte1	TFmatrixID_0198	1294	-	0.94	tgacGACGTgag	bZIP	Os02g0175100;Os03g0796900;Os06g0662200;Os12g0601800
vte1	TFmatrixID_0198	1342	-	0.961	tagaGACGTgga	bZIP	Os02g0175100;Os03g0796900;Os06g0662200;Os12g0601800
vte1	TFmatrixID_0199	1	-	0.973	gaTGACGacg	bZIP	Os01g0279900;Os01g0808100;Os01g0859500;Os02g0194900;Os03g0318600;Os04g0637000;Os05g0443850;Os05g0492000;Os06g0265400;Os06g0614100;Os07g0687700;Os08g0176900;Os09g0280500;Os09g0489500;Os11g0152700;Os12g0152900
vte1	TFmatrixID_0199	380	+	0.973	gggCGTCAca	bZIP	Os01g0279900;Os01g0808100;Os01g0859500;Os02g0194900;Os03g0318600;Os04g0637000;Os05g0443850;Os05g0492000;Os06g0265400;Os06g0614100;Os07g0687700;Os08g0176900;Os09g0280500;Os09g0489500;Os11g0152700;Os12g0152900
vte1	TFmatrixID_0199	478	-	0.997	ggTGACGtag	bZIP	Os01g0279900;Os01g0808100;Os01g0859500;Os02g0194900;Os03g0318600;Os04g0637000;Os05g0443850;Os05g0492000;Os06g0265400;Os06g0614100;Os07g0687700;Os08g0176900;Os09g0280500;Os09g0489500;Os11g0152700;Os12g0152900
vte1	TFmatrixID_0199	747	-	0.995	cgTGACGtgg	bZIP	Os01g0279900;Os01g0808100;Os01g0859500;Os02g0194900;Os03g0318600;Os04g0637000;Os05g0443850;Os05g0492000;Os06g0265400;Os06g0614100;Os07g0687700;Os08g0176900;Os09g0280500;Os09g0489500;Os11g0152700;Os12g0152900
vte1	TFmatrixID_0199	1292	-	0.972	cgTGACGacg	bZIP	Os01g0279900;Os01g0808100;Os01g0859500;Os02g0194900;Os03g0318600;Os04g0637000;Os05g0443850;Os05g0492000;Os06g0265400;Os06g0614100;Os07g0687700;Os08g0176900;Os09g0280500;Os09g0489500;Os11g0152700;Os12g0152900
vte1	TFmatrixID_0200	107	+	0.932	ggcCACGTtgg	bZIP	Os02g0728001;Os08g0487100;Os09g0474000
vte1	TFmatrixID_0200	179	-	0.955	aagACGTGgat	bZIP	Os02g0728001;Os08g0487100;Os09g0474000
vte1	TFmatrixID_0200	748	-	0.951	gtgACGTGgct	bZIP	Os02g0728001;Os08g0487100;Os09g0474000
vte1	TFmatrixID_0200	1287	+	0.971	tgaCACGTgac	bZIP	Os02g0728001;Os08g0487100;Os09g0474000
vte1	TFmatrixID_0200	1288	-	0.971	gacACGTGacg	bZIP	Os02g0728001;Os08g0487100;Os09g0474000
vte1	TFmatrixID_0200	1344	-	0.955	gagACGTGgag	bZIP	Os02g0728001;Os08g0487100;Os09g0474000
vte1	TFmatrixID_0200	1398	+	0.934	cgcCACGTaag	bZIP	Os02g0728001;Os08g0487100;Os09g0474000
vte1	TFmatrixID_0201	109	+	0.945	cCACGTtg	bZIP	Os02g0728001;Os08g0487100;Os09g0474000
vte1	TFmatrixID_0201	180	-	0.978	agACGTGg	bZIP	Os02g0728001;Os08g0487100;Os09g0474000
vte1	TFmatrixID_0201	749	-	1	tgACGTGg	bZIP	Os02g0728001;Os08g0487100;Os09g0474000
vte1	TFmatrixID_0201	1289	+	0.935	aCACGTga	bZIP	Os02g0728001;Os08g0487100;Os09g0474000
vte1	TFmatrixID_0201	1345	-	0.978	agACGTGg	bZIP	Os02g0728001;Os08g0487100;Os09g0474000
vte1	TFmatrixID_0201	1400	+	0.98	cCACGTaa	bZIP	Os02g0728001;Os08g0487100;Os09g0474000
vte1	TFmatrixID_0202	1289	+	0.964	aCACGTga	bZIP	Os01g0867300;Os05g0437700;Os06g0211200
vte1	TFmatrixID_0202	1289	-	0.946	acACGTGa	bZIP	Os01g0867300;Os05g0437700;Os06g0211200
vte1	TFmatrixID_0203	178	-	0.981	aaagACGTGgat	bZIP	Os02g0175100;Os03g0796900;Os06g0662200;Os07g0182000;Os12g0601800
vte1	TFmatrixID_0203	747	-	0.998	cgtgACGTGgct	bZIP	Os02g0175100;Os03g0796900;Os06g0662200;Os07g0182000;Os12g0601800
vte1	TFmatrixID_0203	1287	+	0.987	tgaCACGTgacg	bZIP	Os02g0175100;Os03g0796900;Os06g0662200;Os07g0182000;Os12g0601800
vte1	TFmatrixID_0203	1343	-	0.981	agagACGTGgag	bZIP	Os02g0175100;Os03g0796900;Os06g0662200;Os07g0182000;Os12g0601800
vte1	TFmatrixID_0203	1398	+	0.985	cgcCACGTaagc	bZIP	Os02g0175100;Os03g0796900;Os06g0662200;Os07g0182000;Os12g0601800
vte1	TFmatrixID_0211	1489	+	0.999	cACACTt	C2H2	Os03g0437200;Os12g0583700
vte1	TFmatrixID_0213	1489	+	0.999	cACACTt	C2H2	Os03g0437100;Os03g0437200;Os12g0583700
vte1	TFmatrixID_0220	258	-	0.985	gctACGCGt	CG-1	Os03g0191000;Os07g0623100;Os10g0375600
vte1	TFmatrixID_0220	261	+	0.985	aCGCGTtga	CG-1	Os03g0191000;Os07g0623100;Os10g0375600
vte1	TFmatrixID_0220	741	-	0.985	tagACGCGt	CG-1	Os03g0191000;Os07g0623100;Os10g0375600
vte1	TFmatrixID_0220	744	+	0.985	aCGCGTgac	CG-1	Os03g0191000;Os07g0623100;Os10g0375600
vte1	TFmatrixID_0221	261	-	0.99	ACGCGttga	CG-1	Os03g0191000;Os07g0623100;Os10g0375600
vte1	TFmatrixID_0221	741	+	0.988	tagaCGCGT	CG-1	Os03g0191000;Os07g0623100;Os10g0375600
vte1	TFmatrixID_0224	857	+	0.988	tTTTAAat	TCR	Os01g0761100
vte1	TFmatrixID_0224	857	-	0.991	ttTTAAAt	TCR	Os01g0761100
vte1	TFmatrixID_0227	1145	-	0.965	tctTCAAAtt	TCR	Os01g0761100
vte1	TFmatrixID_0227	1225	-	0.954	tttTCAAAct	TCR	Os01g0761100
vte1	TFmatrixID_0254	985	+	1	cagaTACATtg	EIN3	Os03g0324200;Os03g0324300;Os07g0685700;Os08g0508700
vte1	TFmatrixID_0255	985	-	1	cagATACAt	EIN3	Os03g0324200;Os03g0324300;Os07g0685700;Os08g0508700
vte1	TFmatrixID_0257	985	+	1	cagaTACATtg	EIN3	Os03g0324200;Os03g0324300;Os07g0685700;Os08g0508700;Os09g0490200
vte1	TFmatrixID_0257	1206	+	0.929	ccgtTACATtg	EIN3	Os03g0324200;Os03g0324300;Os07g0685700;Os08g0508700;Os09g0490200
vte1	TFmatrixID_0258	985	+	1	cagATACAtt	EIN3	Os02g0574800;Os03g0324200;Os03g0324300;Os04g0456900;Os07g0685700;Os08g0508700
vte1	TFmatrixID_0262	795	+	0.999	taTGATCtt	GATA	Os01g0976800;Os02g0220400;Os03g0831200;Os05g0155400;Os05g0578900;Os06g0571800
vte1	TFmatrixID_0264	1302	+	0.995	tgAGATCcag	GATA	Os01g0745700;Os02g0645600;Os02g0806300;Os03g0145200;Os05g0520300;Os10g0557600
vte1	TFmatrixID_0265	1303	+	0.948	gAGATCcagc	GATA	Os01g0745700;Os02g0645600;Os02g0806300;Os03g0145200;Os05g0520300;Os10g0557600
vte1	TFmatrixID_0267	1302	+	0.99	tgAGATCcag	GATA	Os01g0745700;Os02g0645600;Os02g0806300;Os03g0145200;Os05g0520300;Os10g0557600
vte1	TFmatrixID_0268	1462	-	0.998	caccGATCGa	GATA	Os04g0544500
vte1	TFmatrixID_0268	1464	+	0.999	cCGATCgatc	GATA	Os04g0544500
vte1	TFmatrixID_0268	1466	-	0.999	gatcGATCGa	GATA	Os04g0544500
vte1	TFmatrixID_0268	1468	+	0.998	tCGATCgagg	GATA	Os04g0544500
vte1	TFmatrixID_0272	1463	-	0.999	accGATCGa	GATA	Os04g0544500
vte1	TFmatrixID_0272	1464	+	0.999	cCGATCgat	GATA	Os04g0544500
vte1	TFmatrixID_0272	1467	-	0.999	atcGATCGa	GATA	Os04g0544500
vte1	TFmatrixID_0272	1468	+	0.999	tCGATCgag	GATA	Os04g0544500
vte1	TFmatrixID_0283	1377	-	0.958	ccAATCAcat	Homeodomain; HD-ZIP	Os01g0643600;Os02g0565600;Os03g0231000;Os04g0548700;Os06g0140400;Os06g0140700;Os08g0465000;Os09g0447000;Os10g0103700;Os10g0561800
vte1	TFmatrixID_0283	1420	+	0.957	cccTGATTgg	Homeodomain; HD-ZIP	Os01g0643600;Os02g0565600;Os03g0231000;Os04g0548700;Os06g0140400;Os06g0140700;Os08g0465000;Os09g0447000;Os10g0103700;Os10g0561800
vte1	TFmatrixID_0286	1377	-	0.992	ccAATCAc	Homeodomain; HD-ZIP	Os01g0643600;Os02g0565600;Os03g0231000;Os04g0548700;Os06g0140400;Os06g0140700;Os08g0465000;Os09g0447000;Os10g0103700;Os10g0561800
vte1	TFmatrixID_0286	1422	+	0.991	cTGATTgg	Homeodomain; HD-ZIP	Os01g0643600;Os02g0565600;Os03g0231000;Os04g0548700;Os06g0140400;Os06g0140700;Os08g0465000;Os09g0447000;Os10g0103700;Os10g0561800
vte1	TFmatrixID_0295	1375	-	0.995	tcccAATCAc	Homeodomain; HD-ZIP	Os02g0649300;Os04g0541700;Os09g0528200
vte1	TFmatrixID_0295	1422	+	0.995	cTGATTggtg	Homeodomain; HD-ZIP	Os02g0649300;Os04g0541700;Os09g0528200
vte1	TFmatrixID_0299	1377	-	0.977	ccAATCAc	Homeodomain; WOX	Os01g0818400
vte1	TFmatrixID_0299	1422	+	0.981	cTGATTgg	Homeodomain; WOX	Os01g0818400
vte1	TFmatrixID_0300	1	+	0.965	gaTGACGacg	Homeodomain; TALE	Os01g0302500;Os03g0673000;Os03g0727000;Os05g0129700;Os07g0129700
vte1	TFmatrixID_0300	380	-	0.96	gggCGTCAca	Homeodomain; TALE	Os01g0302500;Os03g0673000;Os03g0727000;Os05g0129700;Os07g0129700
vte1	TFmatrixID_0300	1292	+	0.968	cgTGACGacg	Homeodomain; TALE	Os01g0302500;Os03g0673000;Os03g0727000;Os05g0129700;Os07g0129700
vte1	TFmatrixID_0312	502	-	0.986	tTAACCtccc	MADF	Os04g0486400
vte1	TFmatrixID_0320	463	-	1	taATATCtc	Myb/SANT	Os02g0680700;Os06g0105800;Os06g0669700
vte1	TFmatrixID_0320	872	-	1	taATATCtc	Myb/SANT	Os02g0680700;Os06g0105800;Os06g0669700
vte1	TFmatrixID_0323	462	+	0.993	ctaATATCtc	Myb/SANT	Os06g0728700
vte1	TFmatrixID_0323	871	+	0.994	ttaATATCtc	Myb/SANT	Os06g0728700
vte1	TFmatrixID_0324	436	+	1	gGAATCtt	Myb/SANT	Os06g0609500;Os08g0346500;Os09g0299200
vte1	TFmatrixID_0324	628	-	1	aaGATTCc	Myb/SANT	Os06g0609500;Os08g0346500;Os09g0299200
vte1	TFmatrixID_0324	1129	-	0.991	taGATTCc	Myb/SANT	Os06g0609500;Os08g0346500;Os09g0299200
vte1	TFmatrixID_0334	462	+	0.985	ctaATATCt	Myb/SANT	Os06g0728700
vte1	TFmatrixID_0334	871	+	0.986	ttaATATCt	Myb/SANT	Os06g0728700
vte1	TFmatrixID_0336	35	+	0.925	cgtTAGGTggc	Myb/SANT	Os05g0429900;LOC_Os08g43550;Os09g0538400;Os11g0180900;Os12g0175400
vte1	TFmatrixID_0337	434	+	1	atgGAATCtt	Myb/SANT	Os01g0176700
vte1	TFmatrixID_0337	628	-	1	aaGATTCcat	Myb/SANT	Os01g0176700
vte1	TFmatrixID_0337	1129	-	0.999	taGATTCcaa	Myb/SANT	Os01g0176700
vte1	TFmatrixID_0338	434	+	1	atgGAATCtt	Myb/SANT	Os01g0176700
vte1	TFmatrixID_0338	628	-	1	aaGATTCcat	Myb/SANT	Os01g0176700
vte1	TFmatrixID_0338	1129	-	0.999	taGATTCcaa	Myb/SANT	Os01g0176700
vte1	TFmatrixID_0340	434	+	1	atgGAATCtt	Myb/SANT	Os06g0609500;Os08g0346500;Os09g0299200
vte1	TFmatrixID_0340	628	-	1	aaGATTCcat	Myb/SANT	Os06g0609500;Os08g0346500;Os09g0299200
vte1	TFmatrixID_0340	1129	-	0.997	taGATTCcaa	Myb/SANT	Os06g0609500;Os08g0346500;Os09g0299200
vte1	TFmatrixID_0341	434	+	0.985	atggAATCTt	Myb/SANT	Os03g0224200
vte1	TFmatrixID_0341	628	-	0.985	aAGATTccat	Myb/SANT	Os03g0224200
vte1	TFmatrixID_0341	904	-	0.978	aAGATTtgac	Myb/SANT	Os03g0224200
vte1	TFmatrixID_0341	1129	-	0.981	tAGATTccaa	Myb/SANT	Os03g0224200
vte1	TFmatrixID_0342	434	+	1	atgGAATCt	Myb/SANT	Os07g0685300
vte1	TFmatrixID_0342	629	-	1	aGATTCcat	Myb/SANT	Os07g0685300
vte1	TFmatrixID_0342	1130	-	1	aGATTCcaa	Myb/SANT	Os07g0685300
vte1	TFmatrixID_0344	434	+	0.984	atgGAATCtt	Myb/SANT	Os03g0224200
vte1	TFmatrixID_0344	628	-	0.984	aaGATTCcat	Myb/SANT	Os03g0224200
vte1	TFmatrixID_0344	1129	-	0.98	taGATTCcaa	Myb/SANT	Os03g0224200
vte1	TFmatrixID_0345	434	+	1	atgGAATCtt	Myb/SANT	Os02g0174000;Os06g0664800;Os08g0346400
vte1	TFmatrixID_0345	628	-	1	aaGATTCcat	Myb/SANT	Os02g0174000;Os06g0664800;Os08g0346400
vte1	TFmatrixID_0345	1129	-	1	taGATTCcaa	Myb/SANT	Os02g0174000;Os06g0664800;Os08g0346400
vte1	TFmatrixID_0348	435	+	0.966	tggaATCTTt	Myb/SANT	Os03g0224200
vte1	TFmatrixID_0348	627	-	0.965	gAAGATtcca	Myb/SANT	Os03g0224200
vte1	TFmatrixID_0348	1013	+	0.989	tcgtATCTTa	Myb/SANT	Os03g0224200
vte1	TFmatrixID_0357	928	+	0.967	tgAATATact	Myb/SANT; G2-like	Os02g0696900;Os03g0766500;Os08g0160300;Os08g0426866;Os09g0395300
vte1	TFmatrixID_0358	433	+	0.997	gatgGAATCt	Myb/SANT	Os03g0325500;Os07g0685300
vte1	TFmatrixID_0358	629	-	0.997	aGATTCcatc	Myb/SANT	Os03g0325500;Os07g0685300
vte1	TFmatrixID_0358	1130	-	0.997	aGATTCcaac	Myb/SANT	Os03g0325500;Os07g0685300
vte1	TFmatrixID_0361	1263	+	0.93	ccTTATCtgc	Myb/SANT	Os01g0187900;Os01g0192300;Os05g0195700;Os10g0561400
vte1	TFmatrixID_0367	434	+	1	atgGAATCtt	Myb/SANT	Os01g0176700;Os02g0325600
vte1	TFmatrixID_0367	628	-	1	aaGATTCcat	Myb/SANT	Os01g0176700;Os02g0325600
vte1	TFmatrixID_0367	1129	-	1	taGATTCcaa	Myb/SANT	Os01g0176700;Os02g0325600
vte1	TFmatrixID_0368	434	+	1	atgGAATCtt	Myb/SANT	Os03g0329900;Os07g0438800
vte1	TFmatrixID_0368	628	-	1	aaGATTCcat	Myb/SANT	Os03g0329900;Os07g0438800
vte1	TFmatrixID_0368	1129	-	0.998	taGATTCcaa	Myb/SANT	Os03g0329900;Os07g0438800
vte1	TFmatrixID_0369	463	+	0.994	taATATCtc	Myb/SANT	Os08g0157600
vte1	TFmatrixID_0369	872	+	0.994	taATATCtc	Myb/SANT	Os08g0157600
vte1	TFmatrixID_0371	434	+	0.996	atgGAATCtt	Myb/SANT	Os02g0796500;Os03g0224200;Os06g0183100
vte1	TFmatrixID_0371	628	-	0.996	aaGATTCcat	Myb/SANT	Os02g0796500;Os03g0224200;Os06g0183100
vte1	TFmatrixID_0371	1129	-	0.995	taGATTCcaa	Myb/SANT	Os02g0796500;Os03g0224200;Os06g0183100
vte1	TFmatrixID_0381	775	+	0.966	ctTACGTa	NAC; NAM	Os01g0104200;Os01g0816100;Os03g0327800;Os03g0815100;Os05g0421600;Os07g0225300;Os07g0566500;Os07g0683200;Os11g0126900;Os11g0184900;Os12g0123700
vte1	TFmatrixID_0382	907	-	0.995	atTTGACtt	NAC; NAM	Os01g0104200;Os01g0816100;Os03g0327800;Os05g0421600;Os07g0566500;Os07g0683200;Os11g0126900;Os11g0184900;Os12g0123700
vte1	TFmatrixID_0383	775	+	0.918	cttACGTAgt	NAC; NAM	13113.t00085;Os02g0252200;Os02g0643600;LOC_Os03g03540;Os06g0104200;Os06g0530400;Os08g0103900;Os08g0115800;Os10g0532000
vte1	TFmatrixID_0398	895	+	0.966	aaGTACGat	SBP	Os01g0922600;Os02g0139400;Os02g0174100;Os02g0177300;Os03g0833300;Os04g0551500;Os04g0656500;Os06g0659100;LOC_Os07g32170;Os08g0509600;Os08g0513700;Os08g0531600;Os09g0507100
vte1	TFmatrixID_0398	1073	-	0.967	gtCGTACat	SBP	Os01g0922600;Os02g0139400;Os02g0174100;Os02g0177300;Os03g0833300;Os04g0551500;Os04g0656500;Os06g0659100;LOC_Os07g32170;Os08g0509600;Os08g0513700;Os08g0531600;Os09g0507100
vte1	TFmatrixID_0399	895	+	0.934	aaGTACGata	SBP	Os01g0922600;Os02g0177300;Os03g0833300;Os04g0551500;Os04g0656500;Os06g0659100;Os06g0703500;LOC_Os07g32170;Os08g0509600;Os08g0513700;Os09g0507100
vte1	TFmatrixID_0399	1072	-	0.935	tgtCGTACat	SBP	Os01g0922600;Os02g0177300;Os03g0833300;Os04g0551500;Os04g0656500;Os06g0659100;Os06g0703500;LOC_Os07g32170;Os08g0509600;Os08g0513700;Os09g0507100
vte1	TFmatrixID_0400	894	+	0.985	taaGTACGa	SBP	Os01g0292900;Os01g0922600;Os02g0177300;Os03g0833300;Os04g0656500;Os06g0659100;Os06g0703500;LOC_Os07g32170;Os08g0509600;Os08g0513700;Os08g0531600;Os09g0507100;Os11g0496600
vte1	TFmatrixID_0400	1074	-	0.985	tCGTACatt	SBP	Os01g0292900;Os01g0922600;Os02g0177300;Os03g0833300;Os04g0656500;Os06g0659100;Os06g0703500;LOC_Os07g32170;Os08g0509600;Os08g0513700;Os08g0531600;Os09g0507100;Os11g0496600
vte1	TFmatrixID_0402	896	+	0.994	aGTACGata	SBP	Os02g0177300;Os03g0833300;Os04g0551500;Os04g0656500;Os06g0659100;LOC_Os07g32170;Os08g0509600;Os08g0513700;Os08g0531600;Os09g0507100
vte1	TFmatrixID_0402	1072	-	0.994	tgtCGTACa	SBP	Os02g0177300;Os03g0833300;Os04g0551500;Os04g0656500;Os06g0659100;LOC_Os07g32170;Os08g0509600;Os08g0513700;Os08g0531600;Os09g0507100
vte1	TFmatrixID_0403	894	-	0.988	taaGTACGat	SBP	Os01g0922600;Os02g0139400;Os02g0174100;Os02g0177300;Os03g0833300;Os04g0656500;Os06g0659100;Os06g0703500;LOC_Os07g32170;Os08g0509600;Os08g0513700;Os08g0531600;Os09g0507100;Os11g0496600
vte1	TFmatrixID_0403	1073	+	0.99	gtCGTACatt	SBP	Os01g0922600;Os02g0139400;Os02g0174100;Os02g0177300;Os03g0833300;Os04g0656500;Os06g0659100;Os06g0703500;LOC_Os07g32170;Os08g0509600;Os08g0513700;Os08g0531600;Os09g0507100;Os11g0496600
vte1	TFmatrixID_0404	1073	-	0.972	gtCGTACat	SBP	Os03g0833300;Os04g0551500;Os06g0659100;LOC_Os07g32170;Os08g0509600;Os08g0513700
vte1	TFmatrixID_0405	896	+	0.983	aGTACGat	SBP	Os01g0922600;Os02g0174100;Os02g0177300;Os03g0833300;Os04g0551500;Os04g0656500;Os06g0659100;LOC_Os07g32170;Os08g0509600;Os08g0513700;Os08g0531600;Os09g0507100;Os11g0496600
vte1	TFmatrixID_0405	1073	-	0.983	gtCGTACa	SBP	Os01g0922600;Os02g0174100;Os02g0177300;Os03g0833300;Os04g0551500;Os04g0656500;Os06g0659100;LOC_Os07g32170;Os08g0509600;Os08g0513700;Os08g0531600;Os09g0507100;Os11g0496600
vte1	TFmatrixID_0406	896	+	0.995	aGTACGata	SBP	Os05g0408200
vte1	TFmatrixID_0406	1072	-	1	tgtCGTACa	SBP	Os05g0408200
vte1	TFmatrixID_0407	896	+	0.943	aGTACGa	SBP	Os01g0922600;Os02g0139400;Os02g0177300;Os03g0833300;Os04g0656500;Os06g0659100;Os06g0703500;LOC_Os07g32170;Os08g0509600;Os08g0513700;Os08g0531600;Os09g0507100;Os11g0496600
vte1	TFmatrixID_0407	1074	-	0.943	tCGTACa	SBP	Os01g0922600;Os02g0139400;Os02g0177300;Os03g0833300;Os04g0656500;Os06g0659100;Os06g0703500;LOC_Os07g32170;Os08g0509600;Os08g0513700;Os08g0531600;Os09g0507100;Os11g0496600
vte1	TFmatrixID_0408	895	+	0.973	aaGTACGat	SBP	Os01g0922600;Os02g0139400;Os02g0174100;Os02g0177300;Os03g0833300;Os04g0551500;Os04g0656500;Os06g0659100;Os06g0703500;LOC_Os07g32170;Os08g0509600;Os08g0513700;Os08g0531600;Os09g0491532;Os09g0507100;Os11g0496600
vte1	TFmatrixID_0408	1073	-	0.974	gtCGTACat	SBP	Os01g0922600;Os02g0139400;Os02g0174100;Os02g0177300;Os03g0833300;Os04g0551500;Os04g0656500;Os06g0659100;Os06g0703500;LOC_Os07g32170;Os08g0509600;Os08g0513700;Os08g0531600;Os09g0491532;Os09g0507100;Os11g0496600
vte1	TFmatrixID_0410	895	+	0.996	aaGTACGat	SBP	Os01g0922600;Os02g0139400;Os02g0174100;Os02g0177300;Os03g0833300;Os04g0551500;Os04g0656500;Os06g0659100;Os06g0703500;LOC_Os07g32170;Os08g0509600;Os08g0513700;Os08g0531600;Os09g0507100;Os11g0496600
vte1	TFmatrixID_0410	1073	-	0.993	gtCGTACat	SBP	Os01g0922600;Os02g0139400;Os02g0174100;Os02g0177300;Os03g0833300;Os04g0551500;Os04g0656500;Os06g0659100;Os06g0703500;LOC_Os07g32170;Os08g0509600;Os08g0513700;Os08g0531600;Os09g0507100;Os11g0496600
vte1	TFmatrixID_0411	893	+	0.978	ctaaGTACGa	SBP	Os01g0922600;Os02g0139400;Os02g0174100;Os02g0177300;Os03g0833300;Os04g0656500;Os06g0659100;Os06g0703500;LOC_Os07g32170;Os08g0509600;Os08g0513700;Os08g0531600;Os09g0507100;Os11g0496600
vte1	TFmatrixID_0411	1074	-	0.978	tCGTACattt	SBP	Os01g0922600;Os02g0139400;Os02g0174100;Os02g0177300;Os03g0833300;Os04g0656500;Os06g0659100;Os06g0703500;LOC_Os07g32170;Os08g0509600;Os08g0513700;Os08g0531600;Os09g0507100;Os11g0496600
vte1	TFmatrixID_0417	229	+	0.997	gcCGACCga	Storekeeper	Os03g0370250;Os07g0636100
vte1	TFmatrixID_0420	1429	+	0.953	gtGGGCCccc	TCP	Os01g0924400;Os02g0747400;Os04g0194600;Os06g0226700;Os09g0521300;Os12g0173300
vte1	TFmatrixID_0420	1429	-	0.953	gtgGGCCCcc	TCP	Os01g0924400;Os02g0747400;Os04g0194600;Os06g0226700;Os09g0521300;Os12g0173300
vte1	TFmatrixID_0424	1427	-	1	tgGTGGGccc	TCP	Os01g0924400;Os02g0747400;Os04g0194600;Os04g0526000;Os06g0226700;Os09g0521300;Os12g0173300
vte1	TFmatrixID_0425	1429	+	0.978	gtGGGCCccc	TCP	Os01g0763200;Os03g0706500;Os03g0785800;Os05g0513100;LOC_Os07g04510;Os07g0152000;LOC_Os12g02090;Os12g0616400
vte1	TFmatrixID_0425	1429	-	0.978	gtgGGCCCcc	TCP	Os01g0763200;Os03g0706500;Os03g0785800;Os05g0513100;LOC_Os07g04510;Os07g0152000;LOC_Os12g02090;Os12g0616400
vte1	TFmatrixID_0426	1429	-	0.995	GTGGGccccc	TCP	Os01g0924400;Os02g0747400;Os04g0194600;Os04g0526000;Os06g0226700;Os09g0521300;Os12g0173300
vte1	TFmatrixID_0426	1431	+	0.912	gggccCCCAC	TCP	Os01g0924400;Os02g0747400;Os04g0194600;Os04g0526000;Os06g0226700;Os09g0521300;Os12g0173300
vte1	TFmatrixID_0429	1429	-	1	GTGGGccc	TCP	Os01g0924400;Os02g0747400;Os04g0194600;Os04g0526000;Os06g0226700;Os09g0521300;Os12g0173300
vte1	TFmatrixID_0429	1433	+	0.933	gccCCCAC	TCP	Os01g0924400;Os02g0747400;Os04g0194600;Os04g0526000;Os06g0226700;Os09g0521300;Os12g0173300
vte1	TFmatrixID_0430	1429	-	1	GTGGGccc	TCP	Os01g0763200;Os03g0706500;Os03g0785800;Os05g0513100;LOC_Os07g04510;Os07g0152000;LOC_Os12g02090
vte1	TFmatrixID_0431	1429	-	1	GTGGGccc	TCP	Os01g0924400;Os02g0747400;Os04g0194600;Os04g0526000;Os06g0226700;Os09g0521300;Os12g0173300
vte1	TFmatrixID_0431	1433	+	0.933	gccCCCAC	TCP	Os01g0924400;Os02g0747400;Os04g0194600;Os04g0526000;Os06g0226700;Os09g0521300;Os12g0173300
vte1	TFmatrixID_0432	1386	+	0.877	tGGACCac	TCP	Os01g0763200
vte1	TFmatrixID_0432	1474	-	0.874	gaGGTCCc	TCP	Os01g0763200
vte1	TFmatrixID_0433	1429	-	0.998	GTGGGccccc	TCP	Os01g0924400;Os02g0747400;Os04g0194600;Os04g0526000;Os06g0226700;Os09g0521300;Os12g0173300
vte1	TFmatrixID_0434	1429	+	0.996	gtGGGCCccc	TCP	Os01g0924400;Os02g0635800;Os04g0194600;Os04g0526000;Os09g0521300
vte1	TFmatrixID_0434	1429	-	0.996	gtgGGCCCcc	TCP	Os01g0924400;Os02g0635800;Os04g0194600;Os04g0526000;Os09g0521300
vte1	TFmatrixID_0435	1429	-	1	GTGGGccc	TCP	Os01g0924400;Os04g0194600;Os04g0526000;Os09g0521300;OsI_08196
vte1	TFmatrixID_0437	1428	-	1	gGTGGGcccc	TCP	Os01g0924400;Os02g0747400;Os04g0194600;Os04g0526000;Os06g0226700;Os09g0521300
vte1	TFmatrixID_0437	1432	+	0.9	ggccCCCACt	TCP	Os01g0924400;Os02g0747400;Os04g0194600;Os04g0526000;Os06g0226700;Os09g0521300
vte1	TFmatrixID_0438	1429	-	1	GTGGGcccc	TCP	Os01g0924400;Os02g0747400;Os04g0194600;Os04g0526000;Os06g0226700;Os09g0521300;Os12g0173300
vte1	TFmatrixID_0439	1429	-	1	GTGGGccc	TCP	Os01g0924400;Os02g0747400;Os04g0194600;Os04g0526000;Os06g0226700;Os09g0521300;Os12g0173300
vte1	TFmatrixID_0440	1386	+	0.953	tGGACCac	TCP	Os01g0763200;Os03g0706500;Os03g0785800;Os05g0513100;LOC_Os07g04510;Os07g0152000;LOC_Os12g02090;Os12g0616400
vte1	TFmatrixID_0444	907	-	0.985	atTTGACtta	WRKY	Os01g0182700;Os01g0185900;Os01g0186000;Os01g0246700;Os01g0289600;Os01g0584900;Os01g0586800;Os01g0624700;Os01g0626400;Os01g0665500;Os01g0714800;Os01g0730700;Os01g0734000;Os01g0750100;Os01g0972800;Os02g0181300;Os02g0265200;Os02g0462800;Os02g0698800;Os02g0770500;Os03g0335200;Os03g0657400;Os03g0741400;Os03g0758000;Os03g0798500;Os03g0855100;Os04g0287400;Os04g0545000;Os04g0597300;Os04g0605100;Os05g0137…
vte1	TFmatrixID_0445	908	-	0.996	tTTGACtt	WRKY	Os01g0182700;Os01g0185900;Os01g0186000;Os01g0246700;Os01g0289600;Os01g0584900;Os01g0586800;Os01g0624700;Os01g0626400;Os01g0665500;Os01g0714800;Os01g0730700;Os01g0734000;Os01g0750100;Os01g0820900;Os01g0972800;Os02g0181300;Os02g0265200;Os02g0462800;Os02g0698800;Os02g0770500;Os03g0741400;Os03g0758000;Os03g0798500;Os03g0855100;Os04g0287400;Os04g0545000;Os04g0597300;Os04g0605100;Os05g0137500;Os05g0183…
vte1	TFmatrixID_0447	907	-	0.982	atTTGACtta	WRKY	Os01g0182700;Os01g0185900;Os01g0186000;Os01g0246700;Os01g0289600;Os01g0584900;Os01g0586800;Os01g0624700;Os01g0626400;Os01g0656400;Os01g0665500;Os01g0714800;Os01g0730700;Os01g0734000;Os01g0750100;Os01g0820400;Os01g0820700;Os01g0820900;Os01g0821300;Os01g0972800;Os02g0181300;Os02g0265200;Os02g0462800;Os02g0698800;Os02g0770500;Os03g0657400;Os03g0741400;Os03g0758000;Os03g0798500;Os03g0855100;Os04g0287…
vte1	TFmatrixID_0451	907	-	0.996	atTTGACtta	WRKY	Os01g0826400;Os03g0444900;Os03g0758900;Os04g0471700;Os05g0343400;Os05g0474800;Os07g0583700;Os07g0596900;Os08g0276200;Os08g0499300;Os11g0685700;Os11g0686250;Os12g0507300
vte1	TFmatrixID_0452	906	-	0.991	gatTTGACtt	WRKY	Os01g0182700;Os01g0185900;Os01g0186000;Os01g0246700;Os01g0289600;Os01g0584900;Os01g0586800;Os01g0624700;Os01g0626400;Os01g0656400;Os01g0665500;Os01g0714800;Os01g0730700;Os01g0734000;Os01g0750100;Os01g0972800;Os02g0181300;Os02g0265200;Os02g0462800;Os02g0698800;Os02g0770500;Os03g0335200;Os03g0741400;Os03g0758000;Os03g0798500;Os03g0855100;Os04g0287400;Os04g0545000;Os04g0597300;Os04g0605100;Os05g0137…
vte1	TFmatrixID_0454	907	-	0.994	atTTGACtta	WRKY	Os01g0182700;Os01g0185900;Os01g0186000;Os01g0246700;Os01g0289600;Os01g0584900;Os01g0586800;Os01g0624700;Os01g0626400;Os01g0656400;Os01g0665500;Os01g0714800;Os01g0730700;Os01g0734000;Os01g0750100;Os01g0820400;Os01g0820700;Os01g0820900;Os01g0972800;Os02g0181300;Os02g0265200;Os02g0462800;Os02g0698800;Os02g0770500;Os03g0335200;Os03g0741400;Os03g0758000;Os03g0798500;Os03g0855100;Os04g0287400;Os04g0545…
vte1	TFmatrixID_0457	906	-	0.971	gatTTGACtt	WRKY	Os01g0182700;Os01g0185900;Os01g0186000;Os01g0246700;Os01g0289600;Os01g0584900;Os01g0586800;Os01g0624700;Os01g0626400;Os01g0656400;Os01g0665500;Os01g0714800;Os01g0730700;Os01g0734000;Os01g0750100;Os01g0820400;Os01g0820700;Os01g0820900;Os01g0821300;Os01g0972800;Os02g0181300;Os02g0265200;Os02g0462800;Os02g0698800;Os02g0770500;Os03g0335200;Os03g0657400;Os03g0741400;Os03g0758000;Os03g0798500;Os03g0855…
vte1	TFmatrixID_0460	908	-	0.977	tTTGACtt	WRKY	Os01g0182700;Os01g0185900;Os01g0186000;Os01g0246700;Os01g0289600;Os01g0584900;Os01g0586800;Os01g0624700;Os01g0626400;Os01g0656400;Os01g0665500;Os01g0714800;Os01g0730700;Os01g0734000;Os01g0750100;Os01g0972800;Os02g0181300;Os02g0265200;Os02g0462800;Os02g0698800;Os02g0770500;Os03g0335200;Os03g0741400;Os03g0758000;Os03g0798500;Os03g0855100;Os04g0287400;Os04g0545000;Os04g0597300;Os04g0605100;Os05g0137…
vte1	TFmatrixID_0469	957	-	0.873	acaactttgTATGGgatg	MADS box; MIKC; M-type	Os01g0201700;Os01g0883100;Os01g0886200;Os02g0104100;Os02g0682200;Os03g0122600;Os03g0752800;Os03g0753100;Os04g0580700;Os05g0203800;Os06g0162800;Os06g0223300;Os07g0108900;Os08g0494100;Os08g0531700;Os09g0507200;Os10g0536100;Os12g0207000
vte1	TFmatrixID_0489	109	+	0.915	cCACGTtg	bZIP	Os01g0658900;Os02g0128200;Os05g0569300;Os07g0209800
vte1	TFmatrixID_0489	180	-	0.991	agACGTGg	bZIP	Os01g0658900;Os02g0128200;Os05g0569300;Os07g0209800
vte1	TFmatrixID_0489	749	-	0.954	tgACGTGg	bZIP	Os01g0658900;Os02g0128200;Os05g0569300;Os07g0209800
vte1	TFmatrixID_0489	1345	-	0.991	agACGTGg	bZIP	Os01g0658900;Os02g0128200;Os05g0569300;Os07g0209800
vte1	TFmatrixID_0489	1400	+	0.945	cCACGTaa	bZIP	Os01g0658900;Os02g0128200;Os05g0569300;Os07g0209800
vte1	TFmatrixID_0490	480	-	1	tGACGTa	bZIP	Os01g0279900;Os01g0808100;Os01g0859500;Os02g0194900;Os03g0318600;Os04g0637000;Os05g0443850;Os05g0492000;Os06g0265400;Os06g0614100;Os07g0687700;Os08g0176900;Os09g0280500;Os09g0489500;Os11g0152700;Os12g0152900
vte1	TFmatrixID_0490	749	-	0.989	tGACGTg	bZIP	Os01g0279900;Os01g0808100;Os01g0859500;Os02g0194900;Os03g0318600;Os04g0637000;Os05g0443850;Os05g0492000;Os06g0265400;Os06g0614100;Os07g0687700;Os08g0176900;Os09g0280500;Os09g0489500;Os11g0152700;Os12g0152900
vte1	TFmatrixID_0496	1285	+	0.954	ggtgaCACGTgacgac	bZIP	Os02g0202950;Os06g0601500
vte1	TFmatrixID_0496	1285	-	0.954	ggtgacACGTGacgac	bZIP	Os02g0202950;Os06g0601500
vte1	TFmatrixID_0497	743	+	0.882	gacgcgtgACGTGg	bHLH	LOC_Os01g18290;Os02g0705500;Os02g0805250;Os03g0231950;Os03g0639300;Os03g0782500;Os04g0350700;Os04g0618600;Os05g0139100;Os06g0164400;Os07g0143200;Os09g0417400;Os10g0556200;Os12g0610200
vte1	TFmatrixID_0497	1283	+	0.973	tcggtgacACGTGa	bHLH	LOC_Os01g18290;Os02g0705500;Os02g0805250;Os03g0231950;Os03g0639300;Os03g0782500;Os04g0350700;Os04g0618600;Os05g0139100;Os06g0164400;Os07g0143200;Os09g0417400;Os10g0556200;Os12g0610200
vte1	TFmatrixID_0497	1289	-	0.968	aCACGTgacgacgt	bHLH	LOC_Os01g18290;Os02g0705500;Os02g0805250;Os03g0231950;Os03g0639300;Os03g0782500;Os04g0350700;Os04g0618600;Os05g0139100;Os06g0164400;Os07g0143200;Os09g0417400;Os10g0556200;Os12g0610200
vte1	TFmatrixID_0497	1339	+	0.872	cattagagACGTGg	bHLH	LOC_Os01g18290;Os02g0705500;Os02g0805250;Os03g0231950;Os03g0639300;Os03g0782500;Os04g0350700;Os04g0618600;Os05g0139100;Os06g0164400;Os07g0143200;Os09g0417400;Os10g0556200;Os12g0610200
vte1	TFmatrixID_0505	1287	+	0.941	tgaCACGTga	bHLH	LOC_Os01g18290;Os02g0805250;Os03g0639300;Os03g0782500;Os04g0618600;Os05g0139100;Os06g0164400;Os07g0143200;Os10g0556200;Os12g0610200
vte1	TFmatrixID_0506	1288	+	0.981	gaCACGTg	bHLH	LOC_Os01g18290;Os02g0805250;Os03g0639300;Os03g0782500;Os04g0618600;Os05g0139100;Os06g0164400;Os07g0143200;Os09g0417400;Os10g0556200;Os12g0610200
vte1	TFmatrixID_0506	1290	-	0.973	cACGTGac	bHLH	LOC_Os01g18290;Os02g0805250;Os03g0639300;Os03g0782500;Os04g0618600;Os05g0139100;Os06g0164400;Os07g0143200;Os09g0417400;Os10g0556200;Os12g0610200
vte1	TFmatrixID_0507	1289	-	0.975	acACGTGa	bHLH	LOC_Os01g18290;Os02g0805250;Os03g0639300;Os03g0782500;Os04g0618600;Os05g0139100;Os06g0164400;Os07g0143200;Os10g0556200;Os12g0610200
vte1	TFmatrixID_0511	1289	+	0.95	aCACGTga	bHLH	Os01g0235700;Os01g0705700;Os03g0671000;Os08g0543700;Os09g0519100;Os10g0575000
vte1	TFmatrixID_0511	1289	-	0.95	acACGTGa	bHLH	Os01g0235700;Os01g0705700;Os03g0671000;Os08g0543700;Os09g0519100;Os10g0575000
vte1	TFmatrixID_0513	1289	+	0.99	aCACGTga	bHLH	Os01g0235700;Os01g0705700;Os03g0671000;Os08g0543700;Os09g0519100;Os10g0575000
vte1	TFmatrixID_0513	1289	-	0.99	acACGTGa	bHLH	Os01g0235700;Os01g0705700;Os03g0671000;Os08g0543700;Os09g0519100;Os10g0575000
vte1	TFmatrixID_0514	1289	+	0.948	acACGTGa	bHLH	Os01g0235700;Os01g0705700;Os03g0671000;Os08g0543700;Os09g0519100;Os10g0575000
vte1	TFmatrixID_0514	1289	-	0.954	aCACGTga	bHLH	Os01g0235700;Os01g0705700;Os03g0671000;Os08g0543700;Os09g0519100;Os10g0575000
vte1	TFmatrixID_0515	100	-	0.877	acaagatggcCACGTtggc	bZIP	Os02g0766700;Os06g0211200;Os09g0456200
vte1	TFmatrixID_0515	747	+	0.883	cgtgACGTGgcttggctta	bZIP	Os02g0766700;Os06g0211200;Os09g0456200
vte1	TFmatrixID_0515	1280	-	0.865	agctcggtgaCACGTgacg	bZIP	Os02g0766700;Os06g0211200;Os09g0456200
vte1	TFmatrixID_0515	1287	+	0.857	tgacACGTGacgacgtgag	bZIP	Os02g0766700;Os06g0211200;Os09g0456200
vte1	TFmatrixID_0515	1391	-	0.898	cacggcccgcCACGTaagc	bZIP	Os02g0766700;Os06g0211200;Os09g0456200
vte1	TFmatrixID_0522	891	+	0.96	tgctaaGTACGataag	SBP	Os01g0922600;Os02g0177300;Os03g0833300;Os04g0551500;Os04g0656500;Os06g0659100;LOC_Os07g32170;Os08g0509600;Os08g0513700;Os08g0531600;Os09g0507100
vte1	TFmatrixID_0522	1070	-	0.983	tttgtCGTACattttg	SBP	Os01g0922600;Os02g0177300;Os03g0833300;Os04g0551500;Os04g0656500;Os06g0659100;LOC_Os07g32170;Os08g0509600;Os08g0513700;Os08g0531600;Os09g0507100
vte1	TFmatrixID_0527	343	-	0.96	gccCAACAtatt	AP2; B3; RAV	Os01g0140700;Os01g0141000;Os01g0693400
vte1	TFmatrixID_0527	884	+	0.959	agaaTGTTGcta	AP2; B3; RAV	Os01g0140700;Os01g0141000;Os01g0693400
vte1	TFmatrixID_0531	1068	-	0.824	gatttgtCGTACattttgg	SBP	Os01g0292900;Os01g0922600;Os02g0177300;Os03g0833300;Os04g0656500;Os06g0659100;Os06g0703500;LOC_Os07g32170;Os08g0509600;Os08g0513700;Os08g0531600;Os09g0507100;Os11g0496600
vte1	TFmatrixID_0533	477	-	0.987	gggTGACGtag	bZIP	Os01g0279900;Os01g0808100;Os01g0859500;Os02g0194900;Os03g0318600;Os04g0637000;Os05g0443850;Os05g0492000;Os06g0265400;Os06g0614100;Os07g0687700;Os08g0176900;Os09g0280500;Os09g0489500;Os11g0152700;Os12g0152900
vte1	TFmatrixID_0533	746	-	0.977	gcgTGACGtgg	bZIP	Os01g0279900;Os01g0808100;Os01g0859500;Os02g0194900;Os03g0318600;Os04g0637000;Os05g0443850;Os05g0492000;Os06g0265400;Os06g0614100;Os07g0687700;Os08g0176900;Os09g0280500;Os09g0489500;Os11g0152700;Os12g0152900
vte1	TFmatrixID_0537	957	-	0.873	acaactttgTATGGgatg	MADS box; MIKC; M-type	Os01g0201700;Os01g0883100;Os01g0886200;Os02g0104100;Os02g0682200;Os03g0122600;Os03g0752800;Os03g0753100;Os04g0580700;Os05g0203800;Os06g0162800;Os06g0223300;Os07g0108900;Os08g0494100;Os08g0531700;Os09g0507200;Os10g0536100;Os12g0207000
vte1	TFmatrixID_0551	1359	-	0.945	CAACCccc	Myb/SANT; MYB	Os01g0812000
vte1	TFmatrixID_0558	104	+	0.807	gatggcCACGTtggcagg	bHLH	LOC_Os01g18290;Os02g0805250;Os03g0639300;Os03g0782500;Os04g0618600;Os05g0139100;Os06g0164400;Os07g0143200;Os10g0556200;Os12g0610200
vte1	TFmatrixID_0558	1284	+	0.963	cggtgaCACGTgacgacg	bHLH	LOC_Os01g18290;Os02g0805250;Os03g0639300;Os03g0782500;Os04g0618600;Os05g0139100;Os06g0164400;Os07g0143200;Os10g0556200;Os12g0610200
vte1	TFmatrixID_0558	1284	-	0.906	cggtgacACGTGacgacg	bHLH	LOC_Os01g18290;Os02g0805250;Os03g0639300;Os03g0782500;Os04g0618600;Os05g0139100;Os06g0164400;Os07g0143200;Os10g0556200;Os12g0610200
vte1	TFmatrixID_0559	105	+	0.872	atggcCACGTtggcagg	bHLH	LOC_Os01g18290;Os02g0805250;Os03g0639300;Os03g0782500;Os04g0618600;Os05g0139100;Os06g0164400;Os07g0143200;Os10g0556200;Os12g0610200
vte1	TFmatrixID_0560	343	-	0.96	gccCAACAtatt	AP2; B3; RAV	Os01g0140700;Os01g0141000;Os01g0693400
vte1	TFmatrixID_0560	884	+	0.959	agaaTGTTGcta	AP2; B3; RAV	Os01g0140700;Os01g0141000;Os01g0693400
vte1	TFmatrixID_0562	986	-	0.982	agaTACAT	EIN3	Os03g0324200;Os03g0324300;Os07g0685700;Os08g0508700
vte1	TFmatrixID_0579	811	-	0.878	ttttTGTTAtatcaa	Myb/SANT	Os04g0348300
vte1	TFmatrixID_0581	454	+	0.822	actacatcctAATAT	AT-Hook	Os01g0835600
vte1	TF_motif_seq_0113	921	+	0.833	TAAACaatgaat	PsaH	X51911
vte1	TF_motif_seq_0113	1254	+	0.75	TAAACacagcct	PsaH	X51911
vte1	TF_motif_seq_0246	3	+	1	TGACG	Homeodomain; TALE	Os03g0727000
vte1	TF_motif_seq_0246	297	+	1	TGACA	Homeodomain; TALE	Os03g0727000
vte1	TF_motif_seq_0246	383	-	1	CGTCA	Homeodomain; TALE	Os03g0727000
vte1	TF_motif_seq_0246	480	+	1	TGACG	Homeodomain; TALE	Os03g0727000
vte1	TF_motif_seq_0246	576	+	1	TGACA	Homeodomain; TALE	Os03g0727000
vte1	TF_motif_seq_0246	731	+	1	TGACT	Homeodomain; TALE	Os03g0727000
vte1	TF_motif_seq_0246	749	+	1	TGACG	Homeodomain; TALE	Os03g0727000
vte1	TF_motif_seq_0246	910	+	1	TGACT	Homeodomain; TALE	Os03g0727000
vte1	TF_motif_seq_0246	1287	+	1	TGACA	Homeodomain; TALE	Os03g0727000
vte1	TF_motif_seq_0246	1294	+	1	TGACG	Homeodomain; TALE	Os03g0727000
vte1	TF_motif_seq_0256	44	-	1	GCATG	B3	Os04g0676600;Os08g0101000
vte1	TF_motif_seq_0256	45	+	0.8	CATGA	B3	Os04g0676600;Os08g0101000
vte1	TF_motif_seq_0256	69	-	0.8	ACATG	B3	Os04g0676600;Os08g0101000
vte1	TF_motif_seq_0256	70	+	1	CATGC	B3	Os04g0676600;Os08g0101000
vte1	TF_motif_seq_0256	117	-	0.8	GCAGG	B3	Os04g0676600;Os08g0101000
vte1	TF_motif_seq_0256	118	+	0.8	CAGGC	B3	Os04g0676600;Os08g0101000
vte1	TF_motif_seq_0256	186	-	0.8	GGATG	B3	Os04g0676600;Os08g0101000
vte1	TF_motif_seq_0256	198	-	0.8	GCATA	B3	Os04g0676600;Os08g0101000
vte1	TF_motif_seq_0256	206	-	0.8	GAATG	B3	Os04g0676600;Os08g0101000
vte1	TF_motif_seq_0256	299	-	0.8	ACATG	B3	Os04g0676600;Os08g0101000
vte1	TF_motif_seq_0256	300	+	1	CATGC	B3	Os04g0676600;Os08g0101000
vte1	TF_motif_seq_0256	458	+	0.8	CATCC	B3	Os04g0676600;Os08g0101000
vte1	TF_motif_seq_0256	488	-	0.8	GCATC	B3	Os04g0676600;Os08g0101000
vte1	TF_motif_seq_0256	489	+	0.8	CATCC	B3	Os04g0676600;Os08g0101000
vte1	TF_motif_seq_0256	569	+	0.8	CTTGC	B3	Os04g0676600;Os08g0101000
vte1	TF_motif_seq_0256	600	-	0.8	CCATG	B3	Os04g0676600;Os08g0101000
vte1	TF_motif_seq_0256	601	+	1	CATGC	B3	Os04g0676600;Os08g0101000
vte1	TF_motif_seq_0256	672	-	0.8	GCGTG	B3	Os04g0676600;Os08g0101000
vte1	TF_motif_seq_0256	676	-	0.8	GGATG	B3	Os04g0676600;Os08g0101000
vte1	TF_motif_seq_0256	712	-	0.8	GCCTG	B3	Os04g0676600;Os08g0101000
vte1	TF_motif_seq_0256	713	+	0.8	CCTGC	B3	Os04g0676600;Os08g0101000
vte1	TF_motif_seq_0256	746	-	0.8	GCGTG	B3	Os04g0676600;Os08g0101000
vte1	TF_motif_seq_0256	756	-	0.8	GCTTG	B3	Os04g0676600;Os08g0101000
vte1	TF_motif_seq_0256	794	-	0.8	GTATG	B3	Os04g0676600;Os08g0101000
vte1	TF_motif_seq_0256	885	-	0.8	GAATG	B3	Os04g0676600;Os08g0101000
vte1	TF_motif_seq_0256	965	-	0.8	GTATG	B3	Os04g0676600;Os08g0101000
vte1	TF_motif_seq_0256	970	-	0.8	GGATG	B3	Os04g0676600;Os08g0101000
vte1	TF_motif_seq_0256	1001	-	0.8	GAATG	B3	Os04g0676600;Os08g0101000
vte1	TF_motif_seq_0256	1373	+	0.8	CATCC	B3	Os04g0676600;Os08g0101000
vte1	TF_motif_seq_0256	1383	-	0.8	ACATG	B3	Os04g0676600;Os08g0101000
vte1	TF_motif_seq_0256	1384	+	0.8	CATGG	B3	Os04g0676600;Os08g0101000
vte1	TF_motif_seq_0256	1481	+	0.8	CCTGC	B3	Os04g0676600;Os08g0101000
vte1	TF_motif_seq_0257	95	+	0.8	CCACT	NF-YB	Os01g0834400;Os02g0725900;Os05g0463800;Os05g0573500
vte1	TF_motif_seq_0257	113	-	0.8	GTTGG	NF-YB	Os01g0834400;Os02g0725900;Os05g0463800;Os05g0573500
vte1	TF_motif_seq_0257	127	-	0.8	ACTGG	NF-YB	Os01g0834400;Os02g0725900;Os05g0463800;Os05g0573500
vte1	TF_motif_seq_0257	143	+	0.8	CCACT	NF-YB	Os01g0834400;Os02g0725900;Os05g0463800;Os05g0573500
vte1	TF_motif_seq_0257	192	-	0.8	AGTGG	NF-YB	Os01g0834400;Os02g0725900;Os05g0463800;Os05g0573500
vte1	TF_motif_seq_0257	202	-	0.8	ATCGG	NF-YB	Os01g0834400;Os02g0725900;Os05g0463800;Os05g0573500
vte1	TF_motif_seq_0257	222	+	0.8	CCTAT	NF-YB	Os01g0834400;Os02g0725900;Os05g0463800;Os05g0573500
vte1	TF_motif_seq_0257	225	-	1	ATTGG	NF-YB	Os01g0834400;Os02g0725900;Os05g0463800;Os05g0573500
vte1	TF_motif_seq_0257	234	+	0.8	CCGAT	NF-YB	Os01g0834400;Os02g0725900;Os05g0463800;Os05g0573500
vte1	TF_motif_seq_0257	246	-	0.8	ACTGG	NF-YB	Os01g0834400;Os02g0725900;Os05g0463800;Os05g0573500
vte1	TF_motif_seq_0257	322	-	0.8	ATAGG	NF-YB	Os01g0834400;Os02g0725900;Os05g0463800;Os05g0573500
vte1	TF_motif_seq_0257	345	+	0.8	CCAAC	NF-YB	Os01g0834400;Os02g0725900;Os05g0463800;Os05g0573500
vte1	TF_motif_seq_0257	352	-	0.8	ATTCG	NF-YB	Os01g0834400;Os02g0725900;Os05g0463800;Os05g0573500
vte1	TF_motif_seq_0257	462	+	0.8	CTAAT	NF-YB	Os01g0834400;Os02g0725900;Os05g0463800;Os05g0573500
vte1	TF_motif_seq_0257	519	-	0.8	ATTGT	NF-YB	Os01g0834400;Os02g0725900;Os05g0463800;Os05g0573500
vte1	TF_motif_seq_0257	523	-	0.8	TTTGG	NF-YB	Os01g0834400;Os02g0725900;Os05g0463800;Os05g0573500
vte1	TF_motif_seq_0257	531	+	0.8	CCCAT	NF-YB	Os01g0834400;Os02g0725900;Os05g0463800;Os05g0573500
vte1	TF_motif_seq_0257	532	+	0.8	CCATT	NF-YB	Os01g0834400;Os02g0725900;Os05g0463800;Os05g0573500
vte1	TF_motif_seq_0257	558	+	0.8	ACAAT	NF-YB	Os01g0834400;Os02g0725900;Os05g0463800;Os05g0573500
vte1	TF_motif_seq_0257	561	-	0.8	ATTTG	NF-YB	Os01g0834400;Os02g0725900;Os05g0463800;Os05g0573500
vte1	TF_motif_seq_0257	595	-	0.8	GTTGG	NF-YB	Os01g0834400;Os02g0725900;Os05g0463800;Os05g0573500
vte1	TF_motif_seq_0257	609	-	0.8	ATGGG	NF-YB	Os01g0834400;Os02g0725900;Os05g0463800;Os05g0573500
vte1	TF_motif_seq_0257	684	-	0.8	ATGGG	NF-YB	Os01g0834400;Os02g0725900;Os05g0463800;Os05g0573500
vte1	TF_motif_seq_0257	689	-	0.8	ATTGT	NF-YB	Os01g0834400;Os02g0725900;Os05g0463800;Os05g0573500
vte1	TF_motif_seq_0257	757	-	0.8	CTTGG	NF-YB	Os01g0834400;Os02g0725900;Os05g0463800;Os05g0573500
vte1	TF_motif_seq_0257	822	+	0.8	TCAAT	NF-YB	Os01g0834400;Os02g0725900;Os05g0463800;Os05g0573500
vte1	TF_motif_seq_0257	853	-	0.8	ATTGT	NF-YB	Os01g0834400;Os02g0725900;Os05g0463800;Os05g0573500
vte1	TF_motif_seq_0257	867	-	0.8	ATTGT	NF-YB	Os01g0834400;Os02g0725900;Os05g0463800;Os05g0573500
vte1	TF_motif_seq_0257	907	-	0.8	ATTTG	NF-YB	Os01g0834400;Os02g0725900;Os05g0463800;Os05g0573500
vte1	TF_motif_seq_0257	924	+	0.8	ACAAT	NF-YB	Os01g0834400;Os02g0725900;Os05g0463800;Os05g0573500
vte1	TF_motif_seq_0257	946	+	0.8	CCCAT	NF-YB	Os01g0834400;Os02g0725900;Os05g0463800;Os05g0573500
vte1	TF_motif_seq_0257	967	-	0.8	ATGGG	NF-YB	Os01g0834400;Os02g0725900;Os05g0463800;Os05g0573500
vte1	TF_motif_seq_0257	992	-	0.8	ATTGT	NF-YB	Os01g0834400;Os02g0725900;Os05g0463800;Os05g0573500
vte1	TF_motif_seq_0257	1002	-	0.8	AATGG	NF-YB	Os01g0834400;Os02g0725900;Os05g0463800;Os05g0573500
vte1	TF_motif_seq_0257	1003	-	0.8	ATGGG	NF-YB	Os01g0834400;Os02g0725900;Os05g0463800;Os05g0573500
vte1	TF_motif_seq_0257	1024	-	0.8	ATTGC	NF-YB	Os01g0834400;Os02g0725900;Os05g0463800;Os05g0573500
vte1	TF_motif_seq_0257	1069	-	0.8	ATTTG	NF-YB	Os01g0834400;Os02g0725900;Os05g0463800;Os05g0573500
vte1	TF_motif_seq_0257	1082	-	0.8	TTTGG	NF-YB	Os01g0834400;Os02g0725900;Os05g0463800;Os05g0573500
vte1	TF_motif_seq_0257	1092	-	1	ATTGG	NF-YB	Os01g0834400;Os02g0725900;Os05g0463800;Os05g0573500
vte1	TF_motif_seq_0257	1116	-	0.8	CTTGG	NF-YB	Os01g0834400;Os02g0725900;Os05g0463800;Os05g0573500
vte1	TF_motif_seq_0257	1135	+	0.8	CCAAC	NF-YB	Os01g0834400;Os02g0725900;Os05g0463800;Os05g0573500
vte1	TF_motif_seq_0257	1149	+	0.8	CAAAT	NF-YB	Os01g0834400;Os02g0725900;Os05g0463800;Os05g0573500
vte1	TF_motif_seq_0257	1213	-	0.8	ATTGT	NF-YB	Os01g0834400;Os02g0725900;Os05g0463800;Os05g0573500
vte1	TF_motif_seq_0257	1219	+	0.8	CTAAT	NF-YB	Os01g0834400;Os02g0725900;Os05g0463800;Os05g0573500
vte1	TF_motif_seq_0257	1236	+	0.8	CTAAT	NF-YB	Os01g0834400;Os02g0725900;Os05g0463800;Os05g0573500
vte1	TF_motif_seq_0257	1312	+	0.8	CCAAC	NF-YB	Os01g0834400;Os02g0725900;Os05g0463800;Os05g0573500
vte1	TF_motif_seq_0257	1340	-	0.8	ATTAG	NF-YB	Os01g0834400;Os02g0725900;Os05g0463800;Os05g0573500
vte1	TF_motif_seq_0257	1365	+	0.8	CCAAG	NF-YB	Os01g0834400;Os02g0725900;Os05g0463800;Os05g0573500
vte1	TF_motif_seq_0257	1371	+	0.8	CCCAT	NF-YB	Os01g0834400;Os02g0725900;Os05g0463800;Os05g0573500
vte1	TF_motif_seq_0257	1377	+	1	CCAAT	NF-YB	Os01g0834400;Os02g0725900;Os05g0463800;Os05g0573500
vte1	TF_motif_seq_0257	1425	-	1	ATTGG	NF-YB	Os01g0834400;Os02g0725900;Os05g0463800;Os05g0573500
vte1	TF_motif_seq_0257	1437	+	0.8	CCACT	NF-YB	Os01g0834400;Os02g0725900;Os05g0463800;Os05g0573500
vte1	TF_motif_seq_0257	1464	+	0.8	CCGAT	NF-YB	Os01g0834400;Os02g0725900;Os05g0463800;Os05g0573500
vte1	TF_motif_seq_0266	32	+	0.75	GGGCG	TCP	Os03g0785800;Os04g0194600;Os12g0616400;Os01g0213800;Os08g0544800;Os11g0175700
vte1	TF_motif_seq_0266	32	-	0.75	GGGCG	TCP	Os03g0785800;Os04g0194600;Os12g0616400;Os01g0213800;Os08g0544800;Os11g0175700
vte1	TF_motif_seq_0266	72	+	0.75	TGCCC	TCP	Os03g0785800;Os04g0194600;Os12g0616400;Os01g0213800;Os08g0544800;Os11g0175700
vte1	TF_motif_seq_0266	72	-	0.75	TGCCC	TCP	Os03g0785800;Os04g0194600;Os12g0616400;Os01g0213800;Os08g0544800;Os11g0175700
vte1	TF_motif_seq_0266	106	+	0.75	TGGCC	TCP	Os03g0785800;Os04g0194600;Os12g0616400;Os01g0213800;Os08g0544800;Os11g0175700
vte1	TF_motif_seq_0266	106	-	0.75	TGGCC	TCP	Os03g0785800;Os04g0194600;Os12g0616400;Os01g0213800;Os08g0544800;Os11g0175700
vte1	TF_motif_seq_0266	107	+	0.75	GGCCA	TCP	Os03g0785800;Os04g0194600;Os12g0616400;Os01g0213800;Os08g0544800;Os11g0175700
vte1	TF_motif_seq_0266	107	-	0.75	GGCCA	TCP	Os03g0785800;Os04g0194600;Os12g0616400;Os01g0213800;Os08g0544800;Os11g0175700
vte1	TF_motif_seq_0266	139	+	0.75	GGATC	TCP	Os03g0785800;Os04g0194600;Os12g0616400;Os01g0213800;Os08g0544800;Os11g0175700
vte1	TF_motif_seq_0266	139	-	0.75	GGATC	TCP	Os03g0785800;Os04g0194600;Os12g0616400;Os01g0213800;Os08g0544800;Os11g0175700
vte1	TF_motif_seq_0266	140	+	0.75	GATCC	TCP	Os03g0785800;Os04g0194600;Os12g0616400;Os01g0213800;Os08g0544800;Os11g0175700
vte1	TF_motif_seq_0266	140	-	0.75	GATCC	TCP	Os03g0785800;Os04g0194600;Os12g0616400;Os01g0213800;Os08g0544800;Os11g0175700
vte1	TF_motif_seq_0266	195	+	0.75	GGAGC	TCP	Os03g0785800;Os04g0194600;Os12g0616400;Os01g0213800;Os08g0544800;Os11g0175700
vte1	TF_motif_seq_0266	195	-	0.75	GGAGC	TCP	Os03g0785800;Os04g0194600;Os12g0616400;Os01g0213800;Os08g0544800;Os11g0175700
vte1	TF_motif_seq_0266	215	+	0.75	GCTCC	TCP	Os03g0785800;Os04g0194600;Os12g0616400;Os01g0213800;Os08g0544800;Os11g0175700
vte1	TF_motif_seq_0266	215	-	0.75	GCTCC	TCP	Os03g0785800;Os04g0194600;Os12g0616400;Os01g0213800;Os08g0544800;Os11g0175700
vte1	TF_motif_seq_0266	227	+	0.75	TGGCC	TCP	Os03g0785800;Os04g0194600;Os12g0616400;Os01g0213800;Os08g0544800;Os11g0175700
vte1	TF_motif_seq_0266	227	-	0.75	TGGCC	TCP	Os03g0785800;Os04g0194600;Os12g0616400;Os01g0213800;Os08g0544800;Os11g0175700
vte1	TF_motif_seq_0266	228	+	0.75	GGCCG	TCP	Os03g0785800;Os04g0194600;Os12g0616400;Os01g0213800;Os08g0544800;Os11g0175700
vte1	TF_motif_seq_0266	228	-	0.75	GGCCG	TCP	Os03g0785800;Os04g0194600;Os12g0616400;Os01g0213800;Os08g0544800;Os11g0175700
vte1	TF_motif_seq_0266	231	+	0.75	CGACC	TCP	Os03g0785800;Os04g0194600;Os12g0616400;Os01g0213800;Os08g0544800;Os11g0175700
vte1	TF_motif_seq_0266	231	-	0.75	CGACC	TCP	Os03g0785800;Os04g0194600;Os12g0616400;Os01g0213800;Os08g0544800;Os11g0175700
vte1	TF_motif_seq_0266	330	+	0.75	AGTCC	TCP	Os03g0785800;Os04g0194600;Os12g0616400;Os01g0213800;Os08g0544800;Os11g0175700
vte1	TF_motif_seq_0266	330	-	0.75	AGTCC	TCP	Os03g0785800;Os04g0194600;Os12g0616400;Os01g0213800;Os08g0544800;Os11g0175700
vte1	TF_motif_seq_0266	331	+	0.75	GTCCC	TCP	Os03g0785800;Os04g0194600;Os12g0616400;Os01g0213800;Os08g0544800;Os11g0175700
vte1	TF_motif_seq_0266	331	-	0.75	GTCCC	TCP	Os03g0785800;Os04g0194600;Os12g0616400;Os01g0213800;Os08g0544800;Os11g0175700
vte1	TF_motif_seq_0266	342	+	0.75	AGCCC	TCP	Os03g0785800;Os04g0194600;Os12g0616400;Os01g0213800;Os08g0544800;Os11g0175700
vte1	TF_motif_seq_0266	342	-	0.75	AGCCC	TCP	Os03g0785800;Os04g0194600;Os12g0616400;Os01g0213800;Os08g0544800;Os11g0175700
vte1	TF_motif_seq_0266	357	+	0.75	AGGCC	TCP	Os03g0785800;Os04g0194600;Os12g0616400;Os01g0213800;Os08g0544800;Os11g0175700
vte1	TF_motif_seq_0266	357	-	0.75	AGGCC	TCP	Os03g0785800;Os04g0194600;Os12g0616400;Os01g0213800;Os08g0544800;Os11g0175700
vte1	TF_motif_seq_0266	358	+	0.75	GGCCG	TCP	Os03g0785800;Os04g0194600;Os12g0616400;Os01g0213800;Os08g0544800;Os11g0175700
vte1	TF_motif_seq_0266	358	-	0.75	GGCCG	TCP	Os03g0785800;Os04g0194600;Os12g0616400;Os01g0213800;Os08g0544800;Os11g0175700
vte1	TF_motif_seq_0266	371	+	0.75	GGCAC	TCP	Os03g0785800;Os04g0194600;Os12g0616400;Os01g0213800;Os08g0544800;Os11g0175700
vte1	TF_motif_seq_0266	371	-	0.75	GGCAC	TCP	Os03g0785800;Os04g0194600;Os12g0616400;Os01g0213800;Os08g0544800;Os11g0175700
vte1	TF_motif_seq_0266	380	+	0.75	GGGCG	TCP	Os03g0785800;Os04g0194600;Os12g0616400;Os01g0213800;Os08g0544800;Os11g0175700
vte1	TF_motif_seq_0266	380	-	0.75	GGGCG	TCP	Os03g0785800;Os04g0194600;Os12g0616400;Os01g0213800;Os08g0544800;Os11g0175700
vte1	TF_motif_seq_0266	446	+	0.75	GGGCG	TCP	Os03g0785800;Os04g0194600;Os12g0616400;Os01g0213800;Os08g0544800;Os11g0175700
vte1	TF_motif_seq_0266	446	-	0.75	GGGCG	TCP	Os03g0785800;Os04g0194600;Os12g0616400;Os01g0213800;Os08g0544800;Os11g0175700
vte1	TF_motif_seq_0266	597	+	0.75	TGGCC	TCP	Os03g0785800;Os04g0194600;Os12g0616400;Os01g0213800;Os08g0544800;Os11g0175700
vte1	TF_motif_seq_0266	597	-	0.75	TGGCC	TCP	Os03g0785800;Os04g0194600;Os12g0616400;Os01g0213800;Os08g0544800;Os11g0175700
vte1	TF_motif_seq_0266	598	+	0.75	GGCCA	TCP	Os03g0785800;Os04g0194600;Os12g0616400;Os01g0213800;Os08g0544800;Os11g0175700
vte1	TF_motif_seq_0266	598	-	0.75	GGCCA	TCP	Os03g0785800;Os04g0194600;Os12g0616400;Os01g0213800;Os08g0544800;Os11g0175700
vte1	TF_motif_seq_0266	710	+	0.75	TGGCC	TCP	Os03g0785800;Os04g0194600;Os12g0616400;Os01g0213800;Os08g0544800;Os11g0175700
vte1	TF_motif_seq_0266	710	-	0.75	TGGCC	TCP	Os03g0785800;Os04g0194600;Os12g0616400;Os01g0213800;Os08g0544800;Os11g0175700
vte1	TF_motif_seq_0266	711	+	0.75	GGCCT	TCP	Os03g0785800;Os04g0194600;Os12g0616400;Os01g0213800;Os08g0544800;Os11g0175700
vte1	TF_motif_seq_0266	711	-	0.75	GGCCT	TCP	Os03g0785800;Os04g0194600;Os12g0616400;Os01g0213800;Os08g0544800;Os11g0175700
vte1	TF_motif_seq_0266	716	+	0.75	GCTCC	TCP	Os03g0785800;Os04g0194600;Os12g0616400;Os01g0213800;Os08g0544800;Os11g0175700
vte1	TF_motif_seq_0266	716	-	0.75	GCTCC	TCP	Os03g0785800;Os04g0194600;Os12g0616400;Os01g0213800;Os08g0544800;Os11g0175700
vte1	TF_motif_seq_0266	943	+	0.75	CGTCC	TCP	Os03g0785800;Os04g0194600;Os12g0616400;Os01g0213800;Os08g0544800;Os11g0175700
vte1	TF_motif_seq_0266	943	-	0.75	CGTCC	TCP	Os03g0785800;Os04g0194600;Os12g0616400;Os01g0213800;Os08g0544800;Os11g0175700
vte1	TF_motif_seq_0266	944	+	0.75	GTCCC	TCP	Os03g0785800;Os04g0194600;Os12g0616400;Os01g0213800;Os08g0544800;Os11g0175700
vte1	TF_motif_seq_0266	944	-	0.75	GTCCC	TCP	Os03g0785800;Os04g0194600;Os12g0616400;Os01g0213800;Os08g0544800;Os11g0175700
vte1	TF_motif_seq_0266	981	+	0.75	TGTCC	TCP	Os03g0785800;Os04g0194600;Os12g0616400;Os01g0213800;Os08g0544800;Os11g0175700
vte1	TF_motif_seq_0266	981	-	0.75	TGTCC	TCP	Os03g0785800;Os04g0194600;Os12g0616400;Os01g0213800;Os08g0544800;Os11g0175700
vte1	TF_motif_seq_0266	994	+	0.75	TGTCC	TCP	Os03g0785800;Os04g0194600;Os12g0616400;Os01g0213800;Os08g0544800;Os11g0175700
vte1	TF_motif_seq_0266	994	-	0.75	TGTCC	TCP	Os03g0785800;Os04g0194600;Os12g0616400;Os01g0213800;Os08g0544800;Os11g0175700
vte1	TF_motif_seq_0266	1005	+	0.75	GGGAC	TCP	Os03g0785800;Os04g0194600;Os12g0616400;Os01g0213800;Os08g0544800;Os11g0175700
vte1	TF_motif_seq_0266	1005	-	0.75	GGGAC	TCP	Os03g0785800;Os04g0194600;Os12g0616400;Os01g0213800;Os08g0544800;Os11g0175700
vte1	TF_motif_seq_0266	1006	+	0.75	GGACT	TCP	Os03g0785800;Os04g0194600;Os12g0616400;Os01g0213800;Os08g0544800;Os11g0175700
vte1	TF_motif_seq_0266	1006	-	0.75	GGACT	TCP	Os03g0785800;Os04g0194600;Os12g0616400;Os01g0213800;Os08g0544800;Os11g0175700
vte1	TF_motif_seq_0266	1061	+	0.75	GGGTC	TCP	Os03g0785800;Os04g0194600;Os12g0616400;Os01g0213800;Os08g0544800;Os11g0175700
vte1	TF_motif_seq_0266	1061	-	0.75	GGGTC	TCP	Os03g0785800;Os04g0194600;Os12g0616400;Os01g0213800;Os08g0544800;Os11g0175700
vte1	TF_motif_seq_0266	1062	+	0.75	GGTCT	TCP	Os03g0785800;Os04g0194600;Os12g0616400;Os01g0213800;Os08g0544800;Os11g0175700
vte1	TF_motif_seq_0266	1062	-	0.75	GGTCT	TCP	Os03g0785800;Os04g0194600;Os12g0616400;Os01g0213800;Os08g0544800;Os11g0175700
vte1	TF_motif_seq_0266	1085	+	0.75	GGGAC	TCP	Os03g0785800;Os04g0194600;Os12g0616400;Os01g0213800;Os08g0544800;Os11g0175700
vte1	TF_motif_seq_0266	1085	-	0.75	GGGAC	TCP	Os03g0785800;Os04g0194600;Os12g0616400;Os01g0213800;Os08g0544800;Os11g0175700
vte1	TF_motif_seq_0266	1086	+	0.75	GGACG	TCP	Os03g0785800;Os04g0194600;Os12g0616400;Os01g0213800;Os08g0544800;Os11g0175700
vte1	TF_motif_seq_0266	1086	-	0.75	GGACG	TCP	Os03g0785800;Os04g0194600;Os12g0616400;Os01g0213800;Os08g0544800;Os11g0175700
vte1	TF_motif_seq_0266	1119	+	0.75	GGGTC	TCP	Os03g0785800;Os04g0194600;Os12g0616400;Os01g0213800;Os08g0544800;Os11g0175700
vte1	TF_motif_seq_0266	1119	-	0.75	GGGTC	TCP	Os03g0785800;Os04g0194600;Os12g0616400;Os01g0213800;Os08g0544800;Os11g0175700
vte1	TF_motif_seq_0266	1120	+	1	GGTCC	TCP	Os03g0785800;Os04g0194600;Os12g0616400;Os01g0213800;Os08g0544800;Os11g0175700
vte1	TF_motif_seq_0266	1120	-	1	GGTCC	TCP	Os03g0785800;Os04g0194600;Os12g0616400;Os01g0213800;Os08g0544800;Os11g0175700
vte1	TF_motif_seq_0266	1305	+	0.75	GATCC	TCP	Os03g0785800;Os04g0194600;Os12g0616400;Os01g0213800;Os08g0544800;Os11g0175700
vte1	TF_motif_seq_0266	1305	-	0.75	GATCC	TCP	Os03g0785800;Os04g0194600;Os12g0616400;Os01g0213800;Os08g0544800;Os11g0175700
vte1	TF_motif_seq_0266	1318	+	0.75	GGGCG	TCP	Os03g0785800;Os04g0194600;Os12g0616400;Os01g0213800;Os08g0544800;Os11g0175700
vte1	TF_motif_seq_0266	1318	-	0.75	GGGCG	TCP	Os03g0785800;Os04g0194600;Os12g0616400;Os01g0213800;Os08g0544800;Os11g0175700
vte1	TF_motif_seq_0266	1325	+	1	GGGCC	TCP	Os03g0785800;Os04g0194600;Os12g0616400;Os01g0213800;Os08g0544800;Os11g0175700
vte1	TF_motif_seq_0266	1325	-	1	GGGCC	TCP	Os03g0785800;Os04g0194600;Os12g0616400;Os01g0213800;Os08g0544800;Os11g0175700
vte1	TF_motif_seq_0266	1326	+	0.75	GGCCG	TCP	Os03g0785800;Os04g0194600;Os12g0616400;Os01g0213800;Os08g0544800;Os11g0175700
vte1	TF_motif_seq_0266	1326	-	0.75	GGCCG	TCP	Os03g0785800;Os04g0194600;Os12g0616400;Os01g0213800;Os08g0544800;Os11g0175700
vte1	TF_motif_seq_0266	1351	+	0.75	GGAGC	TCP	Os03g0785800;Os04g0194600;Os12g0616400;Os01g0213800;Os08g0544800;Os11g0175700
vte1	TF_motif_seq_0266	1351	-	0.75	GGAGC	TCP	Os03g0785800;Os04g0194600;Os12g0616400;Os01g0213800;Os08g0544800;Os11g0175700
vte1	TF_motif_seq_0266	1352	+	0.75	GAGCC	TCP	Os03g0785800;Os04g0194600;Os12g0616400;Os01g0213800;Os08g0544800;Os11g0175700
vte1	TF_motif_seq_0266	1352	-	0.75	GAGCC	TCP	Os03g0785800;Os04g0194600;Os12g0616400;Os01g0213800;Os08g0544800;Os11g0175700
vte1	TF_motif_seq_0266	1353	+	0.75	AGCCC	TCP	Os03g0785800;Os04g0194600;Os12g0616400;Os01g0213800;Os08g0544800;Os11g0175700
vte1	TF_motif_seq_0266	1353	-	0.75	AGCCC	TCP	Os03g0785800;Os04g0194600;Os12g0616400;Os01g0213800;Os08g0544800;Os11g0175700
vte1	TF_motif_seq_0266	1368	+	0.75	AGTCC	TCP	Os03g0785800;Os04g0194600;Os12g0616400;Os01g0213800;Os08g0544800;Os11g0175700
vte1	TF_motif_seq_0266	1368	-	0.75	AGTCC	TCP	Os03g0785800;Os04g0194600;Os12g0616400;Os01g0213800;Os08g0544800;Os11g0175700
vte1	TF_motif_seq_0266	1369	+	0.75	GTCCC	TCP	Os03g0785800;Os04g0194600;Os12g0616400;Os01g0213800;Os08g0544800;Os11g0175700
vte1	TF_motif_seq_0266	1369	-	0.75	GTCCC	TCP	Os03g0785800;Os04g0194600;Os12g0616400;Os01g0213800;Os08g0544800;Os11g0175700
vte1	TF_motif_seq_0266	1387	+	1	GGACC	TCP	Os03g0785800;Os04g0194600;Os12g0616400;Os01g0213800;Os08g0544800;Os11g0175700
vte1	TF_motif_seq_0266	1387	-	1	GGACC	TCP	Os03g0785800;Os04g0194600;Os12g0616400;Os01g0213800;Os08g0544800;Os11g0175700
vte1	TF_motif_seq_0266	1393	+	0.75	CGGCC	TCP	Os03g0785800;Os04g0194600;Os12g0616400;Os01g0213800;Os08g0544800;Os11g0175700
vte1	TF_motif_seq_0266	1393	-	0.75	CGGCC	TCP	Os03g0785800;Os04g0194600;Os12g0616400;Os01g0213800;Os08g0544800;Os11g0175700
vte1	TF_motif_seq_0266	1394	+	1	GGCCC	TCP	Os03g0785800;Os04g0194600;Os12g0616400;Os01g0213800;Os08g0544800;Os11g0175700
vte1	TF_motif_seq_0266	1394	-	1	GGCCC	TCP	Os03g0785800;Os04g0194600;Os12g0616400;Os01g0213800;Os08g0544800;Os11g0175700
vte1	TF_motif_seq_0266	1418	+	0.75	TGCCC	TCP	Os03g0785800;Os04g0194600;Os12g0616400;Os01g0213800;Os08g0544800;Os11g0175700
vte1	TF_motif_seq_0266	1418	-	0.75	TGCCC	TCP	Os03g0785800;Os04g0194600;Os12g0616400;Os01g0213800;Os08g0544800;Os11g0175700
vte1	TF_motif_seq_0266	1431	+	1	GGGCC	TCP	Os03g0785800;Os04g0194600;Os12g0616400;Os01g0213800;Os08g0544800;Os11g0175700
vte1	TF_motif_seq_0266	1431	-	1	GGGCC	TCP	Os03g0785800;Os04g0194600;Os12g0616400;Os01g0213800;Os08g0544800;Os11g0175700
vte1	TF_motif_seq_0266	1432	+	1	GGCCC	TCP	Os03g0785800;Os04g0194600;Os12g0616400;Os01g0213800;Os08g0544800;Os11g0175700
vte1	TF_motif_seq_0266	1432	-	1	GGCCC	TCP	Os03g0785800;Os04g0194600;Os12g0616400;Os01g0213800;Os08g0544800;Os11g0175700
vte1	TF_motif_seq_0266	1433	+	0.75	GCCCC	TCP	Os03g0785800;Os04g0194600;Os12g0616400;Os01g0213800;Os08g0544800;Os11g0175700
vte1	TF_motif_seq_0266	1433	-	0.75	GCCCC	TCP	Os03g0785800;Os04g0194600;Os12g0616400;Os01g0213800;Os08g0544800;Os11g0175700
vte1	TF_motif_seq_0266	1456	+	0.75	AGCCC	TCP	Os03g0785800;Os04g0194600;Os12g0616400;Os01g0213800;Os08g0544800;Os11g0175700
vte1	TF_motif_seq_0266	1456	-	0.75	AGCCC	TCP	Os03g0785800;Os04g0194600;Os12g0616400;Os01g0213800;Os08g0544800;Os11g0175700
vte1	TF_motif_seq_0266	1476	+	1	GGTCC	TCP	Os03g0785800;Os04g0194600;Os12g0616400;Os01g0213800;Os08g0544800;Os11g0175700
vte1	TF_motif_seq_0266	1476	-	1	GGTCC	TCP	Os03g0785800;Os04g0194600;Os12g0616400;Os01g0213800;Os08g0544800;Os11g0175700
vte1	TF_motif_seq_0266	1477	+	0.75	GTCCC	TCP	Os03g0785800;Os04g0194600;Os12g0616400;Os01g0213800;Os08g0544800;Os11g0175700
vte1	TF_motif_seq_0266	1477	-	0.75	GTCCC	TCP	Os03g0785800;Os04g0194600;Os12g0616400;Os01g0213800;Os08g0544800;Os11g0175700
vte1	TF_motif_seq_0266	1483	+	0.75	TGCCC	TCP	Os03g0785800;Os04g0194600;Os12g0616400;Os01g0213800;Os08g0544800;Os11g0175700
vte1	TF_motif_seq_0266	1483	-	0.75	TGCCC	TCP	Os03g0785800;Os04g0194600;Os12g0616400;Os01g0213800;Os08g0544800;Os11g0175700
vte1	TF_motif_seq_0282	862	+	1	AATAAa	Alpha-amylase	M24286;M24287
vte1	TF_motif_seq_0292	229	+	1	gCCGAC	AP2; ERF;ERF	Os08g0565200;Os01g0165000;Os02g0677300;Os03g0174400;Os05g0346200;Os06g0127100;Os01g0968800;Os04g0572400;Os05g0473300;Os06g0165600;Os08g0545500;Os09g0522000;Os09g0522100;Os09g0522200
vte1	TF_motif_seq_0316	4	+	0.833	GACGAc	(Others)	L345501
vte1	TF_motif_seq_0316	4	-	0.833	gACGAC	(Others)	L345501
vte1	TF_motif_seq_0316	181	+	0.833	GACGTg	(Others)	L345501
vte1	TF_motif_seq_0316	181	-	0.833	gACGTG	(Others)	L345501
vte1	TF_motif_seq_0316	381	+	0.833	GGCGTc	(Others)	L345501
vte1	TF_motif_seq_0316	381	-	0.833	gGCGTC	(Others)	L345501
vte1	TF_motif_seq_0316	481	+	0.833	GACGTa	(Others)	L345501
vte1	TF_motif_seq_0316	481	-	0.833	gACGTA	(Others)	L345501
vte1	TF_motif_seq_0316	750	+	0.833	GACGTg	(Others)	L345501
vte1	TF_motif_seq_0316	750	-	0.833	gACGTG	(Others)	L345501
vte1	TF_motif_seq_0316	1295	+	0.833	GACGAc	(Others)	L345501
vte1	TF_motif_seq_0316	1295	-	0.833	gACGAC	(Others)	L345501
vte1	TF_motif_seq_0316	1298	+	0.833	GACGTg	(Others)	L345501
vte1	TF_motif_seq_0316	1298	-	0.833	gACGTG	(Others)	L345501
vte1	TF_motif_seq_0316	1346	+	0.833	GACGTg	(Others)	L345501
vte1	TF_motif_seq_0316	1346	-	0.833	gACGTG	(Others)	L345501
vte1	TF_motif_seq_0316	1474	+	0.833	GAGGTc	(Others)	L345501
vte1	TF_motif_seq_0316	1474	-	0.833	gAGGTC	(Others)	L345501
vte1	TF_motif_seq_0327	220	+	0.833	TACCTa	(Others)	L34551
vte1	TF_motif_seq_0327	220	-	0.833	tACCTA	(Others)	L34551
vte1	TF_motif_seq_0327	481	+	0.833	GACGTa	(Others)	L34551
vte1	TF_motif_seq_0327	481	-	0.833	gACGTA	(Others)	L34551
vte1	TF_motif_seq_0327	777	+	1	TACGTa	(Others)	L34551
vte1	TF_motif_seq_0327	777	-	1	tACGTA	(Others)	L34551
vte1	TF_motif_seq_0327	894	+	0.833	TAAGTa	(Others)	L34551
vte1	TF_motif_seq_0327	894	-	0.833	tAAGTA	(Others)	L34551
vte1	TF_motif_seq_0327	1050	+	0.833	TACATa	(Others)	L34551
vte1	TF_motif_seq_0327	1050	-	0.833	tACATA	(Others)	L34551
vte1	TF_motif_seq_0327	1401	+	0.833	CACGTa	(Others)	L34551
vte1	TF_motif_seq_0327	1401	-	0.833	cACGTA	(Others)	L34551
vte1	TF_motif_seq_0335	514	-	1	gAGACA	B3; ARF;ARF	Os02g0141100;Os02g0164900;Os04g0664400;Os04g0671900;Os06g0196700;Os06g0677800;Os06g0702600;Os08g0520500;Os11g0523800;Os12g0613700;Os01g0236300;Os01g0670800;Os01g0753500;Os01g0927600;Os02g0557200;Os02g0628600;Os04g0442000;Os04g0519700;Os04g0690600;Os05g0515400;Os05g0563400;Os06g0685700;Os10g0479900;Os12g0479400
vte1	TF_motif_seq_0335	564	+	1	TGTCTc	B3; ARF;ARF	Os02g0141100;Os02g0164900;Os04g0664400;Os04g0671900;Os06g0196700;Os06g0677800;Os06g0702600;Os08g0520500;Os11g0523800;Os12g0613700;Os01g0236300;Os01g0670800;Os01g0753500;Os01g0927600;Os02g0557200;Os02g0628600;Os04g0442000;Os04g0519700;Os04g0690600;Os05g0515400;Os05g0563400;Os06g0685700;Os10g0479900;Os12g0479400
vte1	TF_motif_seq_0347	803	-	0.857	tgTAATT	Alpha-amylase	M24286;M24287
vte1	TF_motif_seq_0347	1218	-	0.857	tcTAATT	Alpha-amylase	M24286;M24287
vte1	TF_motif_seq_0347	1235	-	0.857	tcTAATT	Alpha-amylase	M24286;M24287
vte1	TF_motif_seq_0356	86	-	0.857	agCGGCT	ERF	Os02g0782700
vte1	TF_motif_seq_0376	813	-	1	ttTGTTA	Myb/SANT; MYB	Os01g0812000
vte1	TF_motif_seq_0376	867	-	0.857	atTGTTA	Myb/SANT; MYB	Os01g0812000
vte1	TF_motif_seq_0376	955	+	0.857	TAACAac	Myb/SANT; MYB	Os01g0812000
vte1	TF_motif_seq_0379	813	-	1	ttTGTTA	Alpha-amylase	X16509
vte1	TF_motif_seq_0379	867	-	0.84	atTGTTA	Alpha-amylase	X16509
vte1	TF_motif_seq_0379	955	+	0.84	TAACAac	Alpha-amylase	X16509
vte1	TF_motif_seq_0386	524	-	0.857	ttGGATA	Alpha-amylase	X16509
vte1	TF_motif_seq_0422	300	+	0.75	CATGCaca	LEA_5	U22102
vte1	TF_motif_seq_0422	601	+	0.75	CATGCtag	LEA_5	U22102
vte1	TF_motif_seq_0430	1429	-	1	gtgGGCCC	TCP	Os04g0194600;Os08g0544800
vte1	TF_motif_seq_0430	1431	+	0.875	GGGCCccc	TCP	Os04g0194600;Os08g0544800
vte1	TF_motif_seq_0431	215	+	0.75	GCTCCtac	TCP	Os04g0194600;Os08g0544800
vte1	TF_motif_seq_0431	943	+	0.75	CGTCCcat	TCP	Os04g0194600;Os08g0544800
vte1	TF_motif_seq_0431	1003	-	0.75	atgGGACT	TCP	Os04g0194600;Os08g0544800
vte1	TF_motif_seq_0431	1083	-	0.75	ttgGGACG	TCP	Os04g0194600;Os08g0544800
vte1	TF_motif_seq_0431	1117	-	0.75	ttgGGTCC	TCP	Os04g0194600;Os08g0544800
vte1	TF_motif_seq_0431	1368	+	0.75	AGTCCcat	TCP	Os04g0194600;Os08g0544800
vte1	TF_motif_seq_0431	1429	-	0.875	gtgGGCCC	TCP	Os04g0194600;Os08g0544800
vte1	TF_motif_seq_0431	1431	+	0.75	GGGCCccc	TCP	Os04g0194600;Os08g0544800
vte1	TF_motif_seq_0431	1476	+	0.75	GGTCCcct	TCP	Os04g0194600;Os08g0544800
vte1	TF_motif_seq_0446	1399	-	0.875	gccACGTA	LEA_5	U22102
vte1	TF_motif_seq_0508	894	+	0.75	taAGTACga	SBP	Os01g0292900;Os01g0922600;Os02g0139400;Os02g0174100;Os02g0177300;Os03g0833300;Os04g0551500;Os05g0408200;Os06g0659100;Os06g0663500;Os06g0703500;Os08g0509600;Os08g0513700;Os08g0531600;Os09g0491532;Os09g0507100;Os11g0496600
vte1	TF_motif_seq_0508	941	+	0.75	tcCGTCCca	SBP	Os01g0292900;Os01g0922600;Os02g0139400;Os02g0174100;Os02g0177300;Os03g0833300;Os04g0551500;Os05g0408200;Os06g0659100;Os06g0663500;Os06g0703500;Os08g0509600;Os08g0513700;Os08g0531600;Os09g0491532;Os09g0507100;Os11g0496600
vte1	TF_motif_seq_0508	963	-	0.75	ttGTATGgg	SBP	Os01g0292900;Os01g0922600;Os02g0139400;Os02g0174100;Os02g0177300;Os03g0833300;Os04g0551500;Os05g0408200;Os06g0659100;Os06g0663500;Os06g0703500;Os08g0509600;Os08g0513700;Os08g0531600;Os09g0491532;Os09g0507100;Os11g0496600
vte1	TF_motif_seq_0508	1073	+	0.75	gtCGTACat	SBP	Os01g0292900;Os01g0922600;Os02g0139400;Os02g0174100;Os02g0177300;Os03g0833300;Os04g0551500;Os05g0408200;Os06g0659100;Os06g0663500;Os06g0703500;Os08g0509600;Os08g0513700;Os08g0531600;Os09g0491532;Os09g0507100;Os11g0496600
vte1	TF_motif_seq_0508	1084	-	0.75	tgGGACGga	SBP	Os01g0292900;Os01g0922600;Os02g0139400;Os02g0174100;Os02g0177300;Os03g0833300;Os04g0551500;Os05g0408200;Os06g0659100;Os06g0663500;Os06g0703500;Os08g0509600;Os08g0513700;Os08g0531600;Os09g0491532;Os09g0507100;Os11g0496600
vte1	TF_motif_seq_0002	258	-	0.8	gctacGCGTT	(Motif sequence only)
vte1	TF_motif_seq_0013	1048	+	0.7	AGTACataac	(Motif sequence only)
vte1	TF_motif_seq_0068	477	-	0.727	gggtgaCGTAG	(Motif sequence only)
vte1	TF_motif_seq_0259	3	+	0.8	TGACG	(Motif sequence only)
vte1	TF_motif_seq_0259	6	+	1	CGACG	(Motif sequence only)
vte1	TF_motif_seq_0259	6	-	0.8	CGACG	(Motif sequence only)
vte1	TF_motif_seq_0259	9	+	0.8	CGATG	(Motif sequence only)
vte1	TF_motif_seq_0259	109	+	0.8	CCACG	(Motif sequence only)
vte1	TF_motif_seq_0259	112	-	0.8	CGTTG	(Motif sequence only)
vte1	TF_motif_seq_0259	180	+	0.8	AGACG	(Motif sequence only)
vte1	TF_motif_seq_0259	183	-	0.8	CGTGG	(Motif sequence only)
vte1	TF_motif_seq_0259	209	-	0.8	TGTCG	(Motif sequence only)
vte1	TF_motif_seq_0259	231	+	0.8	CGACC	(Motif sequence only)
vte1	TF_motif_seq_0259	259	+	0.8	CTACG	(Motif sequence only)
vte1	TF_motif_seq_0259	264	-	0.8	CGTTG	(Motif sequence only)
vte1	TF_motif_seq_0259	355	+	0.8	CGAGG	(Motif sequence only)
vte1	TF_motif_seq_0259	383	-	0.8	CGTCA	(Motif sequence only)
vte1	TF_motif_seq_0259	406	-	0.8	TGTCG	(Motif sequence only)
vte1	TF_motif_seq_0259	409	-	0.8	CGTGG	(Motif sequence only)
vte1	TF_motif_seq_0259	480	+	0.8	TGACG	(Motif sequence only)
vte1	TF_motif_seq_0259	483	-	0.8	CGTAG	(Motif sequence only)
vte1	TF_motif_seq_0259	492	-	0.8	CCTCG	(Motif sequence only)
vte1	TF_motif_seq_0259	673	-	0.8	CGTGG	(Motif sequence only)
vte1	TF_motif_seq_0259	705	-	0.8	TGTCG	(Motif sequence only)
vte1	TF_motif_seq_0259	708	-	0.8	CGTGG	(Motif sequence only)
vte1	TF_motif_seq_0259	742	+	0.8	AGACG	(Motif sequence only)
vte1	TF_motif_seq_0259	749	+	0.8	TGACG	(Motif sequence only)
vte1	TF_motif_seq_0259	752	-	0.8	CGTGG	(Motif sequence only)
vte1	TF_motif_seq_0259	779	-	0.8	CGTAG	(Motif sequence only)
vte1	TF_motif_seq_0259	943	-	0.8	CGTCC	(Motif sequence only)
vte1	TF_motif_seq_0259	1011	-	0.8	CATCG	(Motif sequence only)
vte1	TF_motif_seq_0259	1072	-	0.8	TGTCG	(Motif sequence only)
vte1	TF_motif_seq_0259	1086	+	0.8	GGACG	(Motif sequence only)
vte1	TF_motif_seq_0259	1171	-	0.8	CATCG	(Motif sequence only)
vte1	TF_motif_seq_0259	1194	-	0.8	CTTCG	(Motif sequence only)
vte1	TF_motif_seq_0259	1294	+	0.8	TGACG	(Motif sequence only)
vte1	TF_motif_seq_0259	1297	+	1	CGACG	(Motif sequence only)
vte1	TF_motif_seq_0259	1297	-	0.8	CGACG	(Motif sequence only)
vte1	TF_motif_seq_0259	1321	+	0.8	CGGCG	(Motif sequence only)
vte1	TF_motif_seq_0259	1321	-	0.8	CGGCG	(Motif sequence only)
vte1	TF_motif_seq_0259	1345	+	0.8	AGACG	(Motif sequence only)
vte1	TF_motif_seq_0259	1348	-	0.8	CGTGG	(Motif sequence only)
vte1	TF_motif_seq_0259	1390	+	0.8	CCACG	(Motif sequence only)
vte1	TF_motif_seq_0259	1400	+	0.8	CCACG	(Motif sequence only)
vte1	TF_motif_seq_0259	1473	+	0.8	CGAGG	(Motif sequence only)
vte1	TF_motif_seq_0259	1493	-	0.8	CTTCG	(Motif sequence only)
vte1	TF_motif_seq_0274	3	-	0.8	TGACG	(Motif sequence only)
vte1	TF_motif_seq_0274	42	+	0.8	TGGCA	(Motif sequence only)
vte1	TF_motif_seq_0274	42	-	0.8	TGGCA	(Motif sequence only)
vte1	TF_motif_seq_0274	65	-	0.8	AGACA	(Motif sequence only)
vte1	TF_motif_seq_0274	115	+	0.8	TGGCA	(Motif sequence only)
vte1	TF_motif_seq_0274	115	-	0.8	TGGCA	(Motif sequence only)
vte1	TF_motif_seq_0274	154	+	0.8	TCTCA	(Motif sequence only)
vte1	TF_motif_seq_0274	209	+	0.8	TGTCG	(Motif sequence only)
vte1	TF_motif_seq_0274	297	+	0.8	TGACA	(Motif sequence only)
vte1	TF_motif_seq_0274	297	-	1	TGACA	(Motif sequence only)
vte1	TF_motif_seq_0274	311	-	0.8	TGATA	(Motif sequence only)
vte1	TF_motif_seq_0274	338	-	0.8	TGAAA	(Motif sequence only)
vte1	TF_motif_seq_0274	383	+	0.8	CGTCA	(Motif sequence only)
vte1	TF_motif_seq_0274	385	-	0.8	TCACA	(Motif sequence only)
vte1	TF_motif_seq_0274	406	+	0.8	TGTCG	(Motif sequence only)
vte1	TF_motif_seq_0274	468	+	0.8	TCTCA	(Motif sequence only)
vte1	TF_motif_seq_0274	480	-	0.8	TGACG	(Motif sequence only)
vte1	TF_motif_seq_0274	498	+	0.8	TGTCT	(Motif sequence only)
vte1	TF_motif_seq_0274	515	-	0.8	AGACA	(Motif sequence only)
vte1	TF_motif_seq_0274	556	-	0.8	AGACA	(Motif sequence only)
vte1	TF_motif_seq_0274	564	+	0.8	TGTCT	(Motif sequence only)
vte1	TF_motif_seq_0274	576	+	0.8	TGACA	(Motif sequence only)
vte1	TF_motif_seq_0274	576	-	1	TGACA	(Motif sequence only)
vte1	TF_motif_seq_0274	644	+	0.8	TCTCA	(Motif sequence only)
vte1	TF_motif_seq_0274	705	+	0.8	TGTCG	(Motif sequence only)
vte1	TF_motif_seq_0274	731	-	0.8	TGACT	(Motif sequence only)
vte1	TF_motif_seq_0274	749	-	0.8	TGACG	(Motif sequence only)
vte1	TF_motif_seq_0274	803	+	0.8	TGTAA	(Motif sequence only)
vte1	TF_motif_seq_0274	815	+	0.8	TGTTA	(Motif sequence only)
vte1	TF_motif_seq_0274	820	+	0.8	TATCA	(Motif sequence only)
vte1	TF_motif_seq_0274	869	+	0.8	TGTTA	(Motif sequence only)
vte1	TF_motif_seq_0274	910	-	0.8	TGACT	(Motif sequence only)
vte1	TF_motif_seq_0274	955	-	0.8	TAACA	(Motif sequence only)
vte1	TF_motif_seq_0274	973	-	0.8	TGAGA	(Motif sequence only)
vte1	TF_motif_seq_0274	981	+	0.8	TGTCC	(Motif sequence only)
vte1	TF_motif_seq_0274	994	+	0.8	TGTCC	(Motif sequence only)
vte1	TF_motif_seq_0274	1038	-	0.8	AGACA	(Motif sequence only)
vte1	TF_motif_seq_0274	1072	+	0.8	TGTCG	(Motif sequence only)
vte1	TF_motif_seq_0274	1154	+	0.8	TTTCA	(Motif sequence only)
vte1	TF_motif_seq_0274	1168	-	0.8	TCACA	(Motif sequence only)
vte1	TF_motif_seq_0274	1209	-	0.8	TTACA	(Motif sequence only)
vte1	TF_motif_seq_0274	1226	+	0.8	TTTCA	(Motif sequence only)
vte1	TF_motif_seq_0274	1248	-	0.8	TGAAA	(Motif sequence only)
vte1	TF_motif_seq_0274	1287	+	0.8	TGACA	(Motif sequence only)
vte1	TF_motif_seq_0274	1287	-	1	TGACA	(Motif sequence only)
vte1	TF_motif_seq_0274	1294	-	0.8	TGACG	(Motif sequence only)
vte1	TF_motif_seq_0274	1302	-	0.8	TGAGA	(Motif sequence only)
vte1	TF_motif_seq_0274	1381	-	0.8	TCACA	(Motif sequence only)
vte1	TF_motif_seq_0291	1407	+	1	AGCAGc	(Motif sequence only)
vte1	TF_motif_seq_0297	172	+	1	CAACTc	(Motif sequence only)
vte1	TF_motif_seq_0321	236	+	1	GATAAt	(Motif sequence only)
vte1	TF_motif_seq_0321	534	-	1	aTTTTC	(Motif sequence only)
vte1	TF_motif_seq_0321	549	-	1	aTTTTC	(Motif sequence only)
vte1	TF_motif_seq_0321	652	-	1	tTTTCC	(Motif sequence only)
vte1	TF_motif_seq_0321	768	-	1	tTTTTC	(Motif sequence only)
vte1	TF_motif_seq_0321	769	-	1	tTTTCC	(Motif sequence only)
vte1	TF_motif_seq_0321	976	+	1	GATAAt	(Motif sequence only)
vte1	TF_motif_seq_0321	1141	-	1	tTTTTC	(Motif sequence only)
vte1	TF_motif_seq_0321	1152	-	1	aTTTTC	(Motif sequence only)
vte1	TF_motif_seq_0321	1161	-	1	tTTTCC	(Motif sequence only)
vte1	TF_motif_seq_0321	1202	-	1	tTTTCC	(Motif sequence only)
vte1	TF_motif_seq_0321	1224	-	1	tTTTTC	(Motif sequence only)
vte1	TF_motif_seq_0324	229	+	1	gCCGAC	(Motif sequence only)
vte1	TF_motif_seq_0328	525	-	1	tGGATA	(Motif sequence only)
vte1	TF_motif_seq_0334	31	+	0.952	TGGGCg	(Motif sequence only)
vte1	TF_motif_seq_0334	342	-	1	aGCCCA	(Motif sequence only)
vte1	TF_motif_seq_0334	379	+	0.952	TGGGCg	(Motif sequence only)
vte1	TF_motif_seq_0334	1430	+	1	TGGGCc	(Motif sequence only)
vte1	TF_motif_seq_0334	1456	-	1	aGCCCA	(Motif sequence only)
vte1	TF_motif_seq_0343	519	-	0.857	atTGTTT	(Motif sequence only)
vte1	TF_motif_seq_0343	853	-	0.857	atTGTTT	(Motif sequence only)
vte1	TF_motif_seq_0343	922	+	0.857	AAACAat	(Motif sequence only)
vte1	TF_motif_seq_0343	1255	+	0.857	AAACAca	(Motif sequence only)
vte1	TF_motif_seq_0344	400	-	0.857	ggTTGTT	(Motif sequence only)
vte1	TF_motif_seq_0344	812	-	0.857	ttTTGTT	(Motif sequence only)
vte1	TF_motif_seq_0344	852	-	0.857	gaTTGTT	(Motif sequence only)
vte1	TF_motif_seq_0353	108	-	1	gcCACGT	(Motif sequence only)
vte1	TF_motif_seq_0353	182	+	0.84	ACGTGga	(Motif sequence only)
vte1	TF_motif_seq_0353	751	+	1	ACGTGgc	(Motif sequence only)
vte1	TF_motif_seq_0353	1288	-	1	gaCACGT	(Motif sequence only)
vte1	TF_motif_seq_0353	1291	+	0.96	ACGTGac	(Motif sequence only)
vte1	TF_motif_seq_0353	1347	+	0.84	ACGTGga	(Motif sequence only)
vte1	TF_motif_seq_0353	1399	-	1	gcCACGT	(Motif sequence only)
vte1	TF_motif_seq_0358	110	-	1	caCGTTG	(Motif sequence only)
vte1	TF_motif_seq_0358	262	-	0.857	cgCGTTG	(Motif sequence only)
vte1	TF_motif_seq_0360	110	+	0.857	CACGTtg	(Motif sequence only)
vte1	TF_motif_seq_0360	1289	-	0.857	acACGTG	(Motif sequence only)
vte1	TF_motif_seq_0360	1290	+	0.857	CACGTga	(Motif sequence only)
vte1	TF_motif_seq_0360	1297	-	0.857	cgACGTG	(Motif sequence only)
vte1	TF_motif_seq_0372	1401	-	0.857	caCGTAA	(Motif sequence only)
vte1	TF_motif_seq_0378	813	-	0.857	ttTGTTA	(Motif sequence only)
vte1	TF_motif_seq_0380	480	+	0.857	TGACGta	(Motif sequence only)
vte1	TF_motif_seq_0380	776	+	0.857	TTACGta	(Motif sequence only)
vte1	TF_motif_seq_0380	898	-	0.857	taCGATA	(Motif sequence only)
vte1	TF_motif_seq_0380	1054	+	0.857	TAACGga	(Motif sequence only)
vte1	TF_motif_seq_0380	1205	-	0.857	tcCGTTA	(Motif sequence only)
vte1	TF_motif_seq_0380	1243	+	0.857	TAACGtg	(Motif sequence only)
vte1	TF_motif_seq_0387	524	-	0.96	ttGGATA	(Motif sequence only)
vte1	TF_motif_seq_0389	859	-	1	ttAAATA	(Motif sequence only)
vte1	TF_motif_seq_0390	11	-	0.857	atGATGA	(Motif sequence only)
vte1	TF_motif_seq_0390	727	-	1	gtGATGA	(Motif sequence only)
vte1	TF_motif_seq_0390	969	-	0.857	ggGATGA	(Motif sequence only)
vte1	TF_motif_seq_0391	1006	-	0.857	ggACTCA	(Motif sequence only)
vte1	TF_motif_seq_0392	833	-	0.857	ttTTGCA	(Motif sequence only)
vte1	TF_motif_seq_0406	107	-	1	ggcCACGT	(Motif sequence only)
vte1	TF_motif_seq_0425	109	+	0.75	CCACGttg	(Motif sequence only)
vte1	TF_motif_seq_0425	305	-	0.75	acaCCTTG	(Motif sequence only)
vte1	TF_motif_seq_0425	333	+	0.75	CCCGGtga	(Motif sequence only)
vte1	TF_motif_seq_0425	392	-	0.75	cctTCTGG	(Motif sequence only)
vte1	TF_motif_seq_0425	507	-	0.75	ctcCCTGG	(Motif sequence only)
vte1	TF_motif_seq_0425	578	-	0.75	acaCCTAG	(Motif sequence only)
vte1	TF_motif_seq_0425	1381	-	0.75	tcaCATGG	(Motif sequence only)
vte1	TF_motif_seq_0429	359	+	0.75	GCCGGcaa	(Motif sequence only)
vte1	TF_motif_seq_0429	621	+	0.75	GGGGGaga	(Motif sequence only)
vte1	TF_motif_seq_0429	1482	-	0.75	ctgCCCGC	(Motif sequence only)
vte1	TF_motif_seq_0458	225	+	1	aTTGGCcg	(Motif sequence only)
vte1	TF_motif_seq_0458	360	-	0.941	ccGGCAAc	(Motif sequence only)
vte1	TF_motif_seq_0458	446	-	1	ggGCGAAa	(Motif sequence only)
vte1	TF_motif_seq_0458	653	+	0.941	tTTCCCct	(Motif sequence only)
vte1	TF_motif_seq_0458	1331	-	0.941	gaGGCAAa	(Motif sequence only)
vte1	TF_motif_seq_0490	832	+	0.876	GTTTTgcac	(Motif sequence only)
vte2	TFmatrixID_0080	223	-	0.998	atGTCGGtac	AP2	Os06g0553700;Os10g0560700;Os11g0242300;Os01g0200600;Os02g0231000;Os02g0656600;Os02g0657000;Os04g0549700;Os04g0549800;Os04g0550200
vte2	TFmatrixID_0084	223	-	1	atGTCGGt	AP2; ERF	Os10g0560700;Os11g0242300;Os02g0656600;Os02g0657000;Os04g0549700;Os04g0549800;Os04g0550200;Os06g0127100
vte2	TFmatrixID_0085	222	-	0.99	tatGTCGGta	AP2; ERF	Os06g0553700;Os10g0560700;Os11g0242300;Os02g0231000;Os02g0558700;Os02g0656600;Os02g0657000;Os04g0430800;Os04g0549700;Os04g0549800;Os04g0550200;Os06g0127100
vte2	TFmatrixID_0086	223	-	0.996	atGTCGGtac	AP2; ERF	Os06g0553700;Os10g0560700;Os11g0242300;Os02g0231000;Os02g0558700;Os02g0656600;Os02g0657000;Os04g0430800;Os04g0549700;Os04g0549800;Os04g0550200;Os06g0127100
vte2	TFmatrixID_0088	224	-	0.986	tGTCGGta	AP2	Os06g0553700;Os10g0560700;Os01g0200600;Os02g0231000;Os02g0656600;Os02g0657000;Os04g0549700;Os04g0549800;Os04g0550200
vte2	TFmatrixID_0109	223	-	0.927	atGTCGGtac	AP2; ERF	Os02g0677300;Os06g0127100
vte2	TFmatrixID_0118	224	-	0.96	tGTCGGta	AP2	Os08g0454000
vte2	TFmatrixID_0119	223	-	0.945	atGTCGGtac	AP2	Os06g0553700;Os08g0454000;Os10g0560700;Os02g0231000;Os02g0656600;Os02g0657000;Os04g0549700;Os04g0549800;Os04g0550200;Os06g0166400
vte2	TFmatrixID_0121	224	-	0.958	tGTCGGta	AP2; ERF	Os06g0553700;Os10g0560700;Os02g0231000;Os02g0656600;Os02g0657000;Os04g0549700;Os04g0549800;Os04g0550200;Os06g0166400;Os06g0197600;Os04g0648900
vte2	TFmatrixID_0127	663	-	0.931	tgTGTTGt	AP2; B3; RAV	Os01g0693400
vte2	TFmatrixID_0130	393	-	0.971	ggatTATATa	AT-Hook	Os06g0326000;Os07g0184800;Os08g0512400;Os09g0491708
vte2	TFmatrixID_0131	902	+	0.999	ccgtATAAA	AT-Hook	Os06g0326000;Os07g0184800;Os08g0512400;Os09g0491708
vte2	TFmatrixID_0131	967	-	0.999	TTTATcttt	AT-Hook	Os06g0326000;Os07g0184800;Os08g0512400;Os09g0491708
vte2	TFmatrixID_0131	1311	-	0.999	TTTATgctt	AT-Hook	Os06g0326000;Os07g0184800;Os08g0512400;Os09g0491708
vte2	TFmatrixID_0131	1429	+	0.999	gataATAAA	AT-Hook	Os06g0326000;Os07g0184800;Os08g0512400;Os09g0491708
vte2	TFmatrixID_0131	1449	+	0.999	agtaATAAA	AT-Hook	Os06g0326000;Os07g0184800;Os08g0512400;Os09g0491708
vte2	TFmatrixID_0133	235	-	0.999	TTTTTccta	AT-Hook	Os01g0835600
vte2	TFmatrixID_0136	1430	+	0.995	ataATAAA	AT-Hook	Os07g0184800
vte2	TFmatrixID_0146	395	-	0.993	ATTATatag	AT-Hook	Os07g0184800
vte2	TFmatrixID_0148	1354	+	0.99	aaAAAATg	AT-Hook	Os02g0824300;Os06g0326000;Os07g0184800;Os08g0512400;Os09g0491708
vte2	TFmatrixID_0152	233	-	1	AATTTtt	AT-Hook	Os06g0326000
vte2	TFmatrixID_0153	964	-	1	ATTTTtat	AT-Hook	Os07g0184800
vte2	TFmatrixID_0156	222	-	0.996	taTGTCGgt	B3; ARF	Os02g0141100;Os02g0164900;Os04g0664400;Os04g0671900;Os06g0196700;Os06g0677800;Os06g0702600;Os08g0520500;Os11g0523800;Os12g0613700
vte2	TFmatrixID_0161	942	+	0.982	ccaACGTGt	bHLH	Os01g0915600;Os02g0564700;Os02g0705500;Os03g0231950;Os03g0728900;Os03g0802900;Os04g0350700;Os05g0103000;Os06g0193400;Os06g0275600;Os07g0193800;Os08g0487700;Os08g0524800;Os08g0536800;Os09g0474100;Os09g0501600;Os09g0510500
vte2	TFmatrixID_0174	59	-	0.75	gaaTGTGC	bHLH	Os01g0915600;Os02g0564700;Os02g0705500;Os03g0231950;Os03g0728900;Os03g0802900;Os04g0350700;Os05g0103000;Os06g0193400;Os06g0275600;Os07g0193800;Os08g0487700;Os08g0524800;Os08g0536800;Os09g0417400;Os09g0474100;Os09g0501600;Os09g0510500
vte2	TFmatrixID_0174	280	-	0.75	tcaAGTGC	bHLH	Os01g0915600;Os02g0564700;Os02g0705500;Os03g0231950;Os03g0728900;Os03g0802900;Os04g0350700;Os05g0103000;Os06g0193400;Os06g0275600;Os07g0193800;Os08g0487700;Os08g0524800;Os08g0536800;Os09g0417400;Os09g0474100;Os09g0501600;Os09g0510500
vte2	TFmatrixID_0174	828	+	0.75	GCCCGtga	bHLH	Os01g0915600;Os02g0564700;Os02g0705500;Os03g0231950;Os03g0728900;Os03g0802900;Os04g0350700;Os05g0103000;Os06g0193400;Os06g0275600;Os07g0193800;Os08g0487700;Os08g0524800;Os08g0536800;Os09g0417400;Os09g0474100;Os09g0501600;Os09g0510500
vte2	TFmatrixID_0174	828	-	0.75	gccCGTGA	bHLH	Os01g0915600;Os02g0564700;Os02g0705500;Os03g0231950;Os03g0728900;Os03g0802900;Os04g0350700;Os05g0103000;Os06g0193400;Os06g0275600;Os07g0193800;Os08g0487700;Os08g0524800;Os08g0536800;Os09g0417400;Os09g0474100;Os09g0501600;Os09g0510500
vte2	TFmatrixID_0174	887	+	0.875	GCACAtgc	bHLH	Os01g0915600;Os02g0564700;Os02g0705500;Os03g0231950;Os03g0728900;Os03g0802900;Os04g0350700;Os05g0103000;Os06g0193400;Os06g0275600;Os07g0193800;Os08g0487700;Os08g0524800;Os08g0536800;Os09g0417400;Os09g0474100;Os09g0501600;Os09g0510500
vte2	TFmatrixID_0174	887	-	0.875	gcaCATGC	bHLH	Os01g0915600;Os02g0564700;Os02g0705500;Os03g0231950;Os03g0728900;Os03g0802900;Os04g0350700;Os05g0103000;Os06g0193400;Os06g0275600;Os07g0193800;Os08g0487700;Os08g0524800;Os08g0536800;Os09g0417400;Os09g0474100;Os09g0501600;Os09g0510500
vte2	TFmatrixID_0176	260	+	0.847	gacACTTGt	bHLH	Os01g0900800;Os02g0564700;Os02g0603600;Os04g0489600;Os08g0506700;Os09g0487900
vte2	TFmatrixID_0176	754	+	0.934	acaACTTGa	bHLH	Os01g0900800;Os02g0564700;Os02g0603600;Os04g0489600;Os08g0506700;Os09g0487900
vte2	TFmatrixID_0176	1303	+	0.847	gtcACTTGt	bHLH	Os01g0900800;Os02g0564700;Os02g0603600;Os04g0489600;Os08g0506700;Os09g0487900
vte2	TFmatrixID_0182	942	+	0.949	ccaACGTGtatca	bZIP	Os01g0859300;Os02g0766700;Os06g0211200;Os09g0456200
vte2	TFmatrixID_0183	942	-	0.93	ccaACGTGtat	bZIP	Os02g0766700;Os06g0211200;Os09g0456200
vte2	TFmatrixID_0185	555	-	0.919	ccTGACGttg	bZIP	Os01g0279900;Os01g0808100;Os01g0859500;Os02g0194900;Os03g0318600;Os04g0637000;Os05g0443850;Os05g0492000;Os06g0265400;Os06g0614100;Os07g0687700;Os08g0176900;Os09g0280500;Os09g0489500;Os11g0152700;Os12g0152900
vte2	TFmatrixID_0185	1093	+	0.908	caaCGTCAaa	bZIP	Os01g0279900;Os01g0808100;Os01g0859500;Os02g0194900;Os03g0318600;Os04g0637000;Os05g0443850;Os05g0492000;Os06g0265400;Os06g0614100;Os07g0687700;Os08g0176900;Os09g0280500;Os09g0489500;Os11g0152700;Os12g0152900
vte2	TFmatrixID_0188	62	-	0.969	tgtgCTGTCa	bZIP	Os03g0127500;Os03g0336200
vte2	TFmatrixID_0188	794	+	0.965	cGACAGttac	bZIP	Os03g0127500;Os03g0336200
vte2	TFmatrixID_0191	555	-	0.95	cctGACGTtg	B3; bZIP;bZIP	LOC_Os02g22280;Os01g0279900;Os01g0808100;Os01g0859500;Os02g0194900;Os03g0318600;Os04g0637000;Os05g0443850;Os05g0492000;Os06g0265400;Os06g0614100;Os07g0687700;Os08g0176900;Os09g0280500;Os09g0489500;Os11g0152700;Os12g0152900
vte2	TFmatrixID_0191	1093	+	0.949	caACGTCaaa	B3; bZIP;bZIP	LOC_Os02g22280;Os01g0279900;Os01g0808100;Os01g0859500;Os02g0194900;Os03g0318600;Os04g0637000;Os05g0443850;Os05g0492000;Os06g0265400;Os06g0614100;Os07g0687700;Os08g0176900;Os09g0280500;Os09g0489500;Os11g0152700;Os12g0152900
vte2	TFmatrixID_0193	261	+	0.875	ACACTtgt	bZIP	Os02g0766700;Os05g0489700;Os06g0211200;Os09g0456200
vte2	TFmatrixID_0193	261	-	0.875	acaCTTGT	bZIP	Os02g0766700;Os05g0489700;Os06g0211200;Os09g0456200
vte2	TFmatrixID_0193	481	+	0.75	ACATGtat	bZIP	Os02g0766700;Os05g0489700;Os06g0211200;Os09g0456200
vte2	TFmatrixID_0193	660	-	0.75	ccaTGTGT	bZIP	Os02g0766700;Os05g0489700;Os06g0211200;Os09g0456200
vte2	TFmatrixID_0193	681	+	0.75	ACACTagt	bZIP	Os02g0766700;Os05g0489700;Os06g0211200;Os09g0456200
vte2	TFmatrixID_0193	943	-	0.75	caaCGTGT	bZIP	Os02g0766700;Os05g0489700;Os06g0211200;Os09g0456200
vte2	TFmatrixID_0193	1129	+	0.875	ACAGGtgt	bZIP	Os02g0766700;Os05g0489700;Os06g0211200;Os09g0456200
vte2	TFmatrixID_0193	1129	-	0.875	acaGGTGT	bZIP	Os02g0766700;Os05g0489700;Os06g0211200;Os09g0456200
vte2	TFmatrixID_0193	1281	-	0.75	ccaTGTGT	bZIP	Os02g0766700;Os05g0489700;Os06g0211200;Os09g0456200
vte2	TFmatrixID_0193	1304	-	0.75	tcaCTTGT	bZIP	Os02g0766700;Os05g0489700;Os06g0211200;Os09g0456200
vte2	TFmatrixID_0194	943	-	0.934	caACGTGtat	bZIP	Os01g0658900;Os02g0128200;Os05g0569300;Os07g0209800;Os12g0233800
vte2	TFmatrixID_0195	555	-	0.974	ccTGACGttg	B3; bZIP;bZIP	LOC_Os02g22280;Os01g0279900;Os01g0808100;Os01g0859500;Os02g0194900;Os03g0318600;Os04g0637000;Os05g0443850;Os05g0492000;Os06g0265400;Os06g0614100;Os07g0687700;Os08g0176900;Os09g0280500;Os09g0489500;Os11g0152700;Os12g0152900
vte2	TFmatrixID_0195	1093	+	0.969	caaCGTCAaa	B3; bZIP;bZIP	LOC_Os02g22280;Os01g0279900;Os01g0808100;Os01g0859500;Os02g0194900;Os03g0318600;Os04g0637000;Os05g0443850;Os05g0492000;Os06g0265400;Os06g0614100;Os07g0687700;Os08g0176900;Os09g0280500;Os09g0489500;Os11g0152700;Os12g0152900
vte2	TFmatrixID_0195	1379	-	0.929	ttTGACGcaa	B3; bZIP;bZIP	LOC_Os02g22280;Os01g0279900;Os01g0808100;Os01g0859500;Os02g0194900;Os03g0318600;Os04g0637000;Os05g0443850;Os05g0492000;Os06g0265400;Os06g0614100;Os07g0687700;Os08g0176900;Os09g0280500;Os09g0489500;Os11g0152700;Os12g0152900
vte2	TFmatrixID_0196	556	-	0.992	cTGACGtt	B3; bZIP;bZIP	LOC_Os02g22280;Os01g0279900;Os01g0808100;Os01g0859500;Os02g0194900;Os03g0318600;Os04g0637000;Os05g0443850;Os05g0492000;Os06g0265400;Os06g0614100;Os07g0687700;Os08g0176900;Os09g0280500;Os09g0489500;Os11g0152700;Os12g0152900
vte2	TFmatrixID_0196	1094	+	0.985	aaCGTCAa	B3; bZIP;bZIP	LOC_Os02g22280;Os01g0279900;Os01g0808100;Os01g0859500;Os02g0194900;Os03g0318600;Os04g0637000;Os05g0443850;Os05g0492000;Os06g0265400;Os06g0614100;Os07g0687700;Os08g0176900;Os09g0280500;Os09g0489500;Os11g0152700;Os12g0152900
vte2	TFmatrixID_0197	555	-	0.958	ccTGACGttg	bZIP	Os01g0279900;Os01g0808100;Os01g0859500;Os02g0194900;Os03g0318600;Os04g0637000;Os05g0443850;Os05g0492000;Os06g0265400;Os06g0614100;Os07g0687700;Os08g0176900;Os09g0280500;Os09g0489500;Os11g0152700;Os12g0152900
vte2	TFmatrixID_0197	1093	+	0.941	caaCGTCAaa	bZIP	Os01g0279900;Os01g0808100;Os01g0859500;Os02g0194900;Os03g0318600;Os04g0637000;Os05g0443850;Os05g0492000;Os06g0265400;Os06g0614100;Os07g0687700;Os08g0176900;Os09g0280500;Os09g0489500;Os11g0152700;Os12g0152900
vte2	TFmatrixID_0198	554	-	0.926	gcctGACGTtgt	bZIP	Os02g0175100;Os03g0796900;Os06g0662200;Os12g0601800
vte2	TFmatrixID_0198	1092	+	0.922	acaACGTCaaat	bZIP	Os02g0175100;Os03g0796900;Os06g0662200;Os12g0601800
vte2	TFmatrixID_0199	555	-	0.994	ccTGACGttg	bZIP	Os01g0279900;Os01g0808100;Os01g0859500;Os02g0194900;Os03g0318600;Os04g0637000;Os05g0443850;Os05g0492000;Os06g0265400;Os06g0614100;Os07g0687700;Os08g0176900;Os09g0280500;Os09g0489500;Os11g0152700;Os12g0152900
vte2	TFmatrixID_0199	575	+	0.966	cacCGTCAta	bZIP	Os01g0279900;Os01g0808100;Os01g0859500;Os02g0194900;Os03g0318600;Os04g0637000;Os05g0443850;Os05g0492000;Os06g0265400;Os06g0614100;Os07g0687700;Os08g0176900;Os09g0280500;Os09g0489500;Os11g0152700;Os12g0152900
vte2	TFmatrixID_0199	1093	+	0.984	caaCGTCAaa	bZIP	Os01g0279900;Os01g0808100;Os01g0859500;Os02g0194900;Os03g0318600;Os04g0637000;Os05g0443850;Os05g0492000;Os06g0265400;Os06g0614100;Os07g0687700;Os08g0176900;Os09g0280500;Os09g0489500;Os11g0152700;Os12g0152900
vte2	TFmatrixID_0199	1379	-	0.964	ttTGACGcaa	bZIP	Os01g0279900;Os01g0808100;Os01g0859500;Os02g0194900;Os03g0318600;Os04g0637000;Os05g0443850;Os05g0492000;Os06g0265400;Os06g0614100;Os07g0687700;Os08g0176900;Os09g0280500;Os09g0489500;Os11g0152700;Os12g0152900
vte2	TFmatrixID_0202	943	-	0.848	caACGTGt	bZIP	Os01g0867300;Os05g0437700;Os06g0211200
vte2	TFmatrixID_0211	260	+	0.999	gACACTt	C2H2	Os03g0437200;Os12g0583700
vte2	TFmatrixID_0211	680	+	0.999	cACACTa	C2H2	Os03g0437200;Os12g0583700
vte2	TFmatrixID_0211	1022	-	0.999	cAGTGTa	C2H2	Os03g0437200;Os12g0583700
vte2	TFmatrixID_0211	1138	-	0.999	cAGTGTa	C2H2	Os03g0437200;Os12g0583700
vte2	TFmatrixID_0213	260	+	0.999	gACACTt	C2H2	Os03g0437100;Os03g0437200;Os12g0583700
vte2	TFmatrixID_0213	680	+	1	cACACTa	C2H2	Os03g0437100;Os03g0437200;Os12g0583700
vte2	TFmatrixID_0213	1022	-	1	cAGTGTa	C2H2	Os03g0437100;Os03g0437200;Os12g0583700
vte2	TFmatrixID_0213	1138	-	1	cAGTGTa	C2H2	Os03g0437100;Os03g0437200;Os12g0583700
vte2	TFmatrixID_0214	1019	-	0.983	agtcAGTGTagta	C2H2	Os01g0838600;Os01g0839100;Os03g0279700;Os03g0820300;Os05g0114400;Os05g0460900
vte2	TFmatrixID_0214	1135	-	0.999	gtacAGTGTactt	C2H2	Os01g0838600;Os01g0839100;Os03g0279700;Os03g0820300;Os05g0114400;Os05g0460900
vte2	TFmatrixID_0227	1406	+	0.954	ctTTTGAact	TCR	Os01g0761100
vte2	TFmatrixID_0255	947	+	0.974	gTGTATcat	EIN3	Os03g0324200;Os03g0324300;Os07g0685700;Os08g0508700
vte2	TFmatrixID_0259	451	+	0.919	ctGATCTa	GATA	Os01g0745700;Os02g0645600;Os02g0806300;Os03g0145200;Os05g0520300;Os10g0557600
vte2	TFmatrixID_0262	8	+	1	aaTGATCag	GATA	Os01g0976800;Os02g0220400;Os03g0831200;Os05g0155400;Os05g0578900;Os06g0571800
vte2	TFmatrixID_0262	9	-	0.999	atGATCAgt	GATA	Os01g0976800;Os02g0220400;Os03g0831200;Os05g0155400;Os05g0578900;Os06g0571800
vte2	TFmatrixID_0262	138	+	1	aaTGATCag	GATA	Os01g0976800;Os02g0220400;Os03g0831200;Os05g0155400;Os05g0578900;Os06g0571800
vte2	TFmatrixID_0262	139	-	0.999	atGATCAgt	GATA	Os01g0976800;Os02g0220400;Os03g0831200;Os05g0155400;Os05g0578900;Os06g0571800
vte2	TFmatrixID_0262	266	+	1	tgTGATCgc	GATA	Os01g0976800;Os02g0220400;Os03g0831200;Os05g0155400;Os05g0578900;Os06g0571800
vte2	TFmatrixID_0262	605	+	0.999	tcTGATCaa	GATA	Os01g0976800;Os02g0220400;Os03g0831200;Os05g0155400;Os05g0578900;Os06g0571800
vte2	TFmatrixID_0262	606	-	1	ctGATCAaa	GATA	Os01g0976800;Os02g0220400;Os03g0831200;Os05g0155400;Os05g0578900;Os06g0571800
vte2	TFmatrixID_0262	870	+	1	ttTGATCag	GATA	Os01g0976800;Os02g0220400;Os03g0831200;Os05g0155400;Os05g0578900;Os06g0571800
vte2	TFmatrixID_0262	871	-	0.999	ttGATCAga	GATA	Os01g0976800;Os02g0220400;Os03g0831200;Os05g0155400;Os05g0578900;Os06g0571800
vte2	TFmatrixID_0263	1222	-	1	ttGATCT	Dof;GATA	Os03g0684000;Os02g0148500;Os03g0734900
vte2	TFmatrixID_0264	450	-	0.995	cctGATCTaa	GATA	Os01g0745700;Os02g0645600;Os02g0806300;Os03g0145200;Os05g0520300;Os10g0557600
vte2	TFmatrixID_0264	1221	-	0.995	tttGATCTag	GATA	Os01g0745700;Os02g0645600;Os02g0806300;Os03g0145200;Os05g0520300;Os10g0557600
vte2	TFmatrixID_0265	344	-	0.951	gcctGATCTt	GATA	Os01g0745700;Os02g0645600;Os02g0806300;Os03g0145200;Os05g0520300;Os10g0557600
vte2	TFmatrixID_0265	449	-	0.954	ccctGATCTa	GATA	Os01g0745700;Os02g0645600;Os02g0806300;Os03g0145200;Os05g0520300;Os10g0557600
vte2	TFmatrixID_0265	1220	-	0.958	atttGATCTa	GATA	Os01g0745700;Os02g0645600;Os02g0806300;Os03g0145200;Os05g0520300;Os10g0557600
vte2	TFmatrixID_0266	451	+	0.988	ctGATCTaa	GATA	Os01g0745700;Os02g0645600;Os02g0806300;Os03g0145200;Os05g0520300;Os10g0557600
vte2	TFmatrixID_0266	1222	+	0.987	ttGATCTag	GATA	Os01g0745700;Os02g0645600;Os02g0806300;Os03g0145200;Os05g0520300;Os10g0557600
vte2	TFmatrixID_0267	450	-	0.988	cctGATCTaa	GATA	Os01g0745700;Os02g0645600;Os02g0806300;Os03g0145200;Os05g0520300;Os10g0557600
vte2	TFmatrixID_0267	1221	-	0.99	tttGATCTag	GATA	Os01g0745700;Os02g0645600;Os02g0806300;Os03g0145200;Os05g0520300;Os10g0557600
vte2	TFmatrixID_0268	265	-	0.999	ttgtGATCGc	GATA	Os04g0544500
vte2	TFmatrixID_0270	449	-	0.997	ccctGATCTa	GATA	Os01g0745700;Os02g0645600;Os02g0806300;Os03g0145200;Os05g0520300;Os10g0557600;Os11g0187200
vte2	TFmatrixID_0270	1220	-	0.997	atttGATCTa	GATA	Os01g0745700;Os02g0645600;Os02g0806300;Os03g0145200;Os05g0520300;Os10g0557600;Os11g0187200
vte2	TFmatrixID_0271	450	+	0.968	cctGATCTaa	GATA	Os01g0745700;Os02g0645600;Os02g0806300;Os03g0145200;Os05g0520300;Os10g0557600;Os11g0187200
vte2	TFmatrixID_0272	266	-	0.999	tgtGATCGc	GATA	Os04g0544500
vte2	TFmatrixID_0278	64	-	0.996	tgcTGTCAag	Homeodomain; TALE	Os01g0302500;Os03g0673000;Os03g0727000;Os03g0727150;Os05g0129700;Os07g0129700
vte2	TFmatrixID_0280	712	+	0.939	tgtTTAATga	Homeodomain; HD-ZIP	Os02g0674800;Os04g0569100;Os04g0627000;Os06g0207966;Os08g0136100;Os08g0187500;Os09g0526200;Os10g0575600
vte2	TFmatrixID_0283	77	+	0.957	aggTGATTgg	Homeodomain; HD-ZIP	Os01g0643600;Os02g0565600;Os03g0231000;Os04g0548700;Os06g0140400;Os06g0140700;Os08g0465000;Os09g0447000;Os10g0103700;Os10g0561800
vte2	TFmatrixID_0283	637	+	0.995	agaTGATTgc	Homeodomain; HD-ZIP	Os01g0643600;Os02g0565600;Os03g0231000;Os04g0548700;Os06g0140400;Os06g0140700;Os08g0465000;Os09g0447000;Os10g0103700;Os10g0561800
vte2	TFmatrixID_0286	79	+	0.992	gTGATTgg	Homeodomain; HD-ZIP	Os01g0643600;Os02g0565600;Os03g0231000;Os04g0548700;Os06g0140400;Os06g0140700;Os08g0465000;Os09g0447000;Os10g0103700;Os10g0561800
vte2	TFmatrixID_0286	639	+	1	aTGATTgc	Homeodomain; HD-ZIP	Os01g0643600;Os02g0565600;Os03g0231000;Os04g0548700;Os06g0140400;Os06g0140700;Os08g0465000;Os09g0447000;Os10g0103700;Os10g0561800
vte2	TFmatrixID_0289	637	+	0.987	agaTGATTgc	Homeodomain; HD-ZIP	Os01g0643600;Os02g0565600;Os03g0231000;Os04g0548700;Os06g0140400;Os06g0140700;Os08g0465000;Os09g0447000;Os10g0103700;Os10g0561800
vte2	TFmatrixID_0289	742	+	0.974	acaTGATTca	Homeodomain; HD-ZIP	Os01g0643600;Os02g0565600;Os03g0231000;Os04g0548700;Os06g0140400;Os06g0140700;Os08g0465000;Os09g0447000;Os10g0103700;Os10g0561800
vte2	TFmatrixID_0293	64	-	0.997	tgcTGTCAag	Homeodomain; TALE	Os02g0182800;Os06g0646600;Os08g0292900
vte2	TFmatrixID_0295	79	+	0.995	gTGATTggtc	Homeodomain; HD-ZIP	Os02g0649300;Os04g0541700;Os09g0528200
vte2	TFmatrixID_0295	639	+	0.995	aTGATTgctg	Homeodomain; HD-ZIP	Os02g0649300;Os04g0541700;Os09g0528200
vte2	TFmatrixID_0296	289	-	0.998	gtaGATTAga	Homeodomain; ZF-HD	Os02g0706600
vte2	TFmatrixID_0296	455	+	1	tcTAATCact	Homeodomain; ZF-HD	Os02g0706600
vte2	TFmatrixID_0296	1236	+	0.998	ctTAATCggt	Homeodomain; ZF-HD	Os02g0706600
vte2	TFmatrixID_0298	636	+	0.994	gagaTGATTg	Homeodomain; HD-ZIP	Os02g0729700;Os03g0170600;Os03g0188900;Os08g0416000;Os08g0481400;Os09g0379600;Os09g0470500;Os10g0377300;Os10g0404900
vte2	TFmatrixID_0299	79	+	0.977	gTGATTgg	Homeodomain; WOX	Os01g0818400
vte2	TFmatrixID_0299	639	+	0.976	aTGATTgc	Homeodomain; WOX	Os01g0818400
vte2	TFmatrixID_0301	65	-	1	gcTGTCAa	Homeodomain; TALE	Os03g0673000;Os03g0727000;Os03g0727150;Os03g0771500;Os05g0129700;Os07g0129700
vte2	TFmatrixID_0337	1175	+	0.997	acaGAATCtg	Myb/SANT	Os01g0176700
vte2	TFmatrixID_0338	1175	+	1	acaGAATCtg	Myb/SANT	Os01g0176700
vte2	TFmatrixID_0340	1175	+	0.989	acaGAATCtg	Myb/SANT	Os06g0609500;Os08g0346500;Os09g0299200
vte2	TFmatrixID_0341	1175	+	0.989	acagAATCTg	Myb/SANT	Os03g0224200
vte2	TFmatrixID_0344	1175	+	0.99	acaGAATCtg	Myb/SANT	Os03g0224200
vte2	TFmatrixID_0345	1175	+	0.997	acaGAATCtg	Myb/SANT	Os02g0174000;Os06g0664800;Os08g0346400
vte2	TFmatrixID_0354	1175	+	0.942	acaGAATCtgg	Myb/SANT; G2-like	Os01g0971800;Os05g0412000
vte2	TFmatrixID_0367	1175	+	0.997	acaGAATCtg	Myb/SANT	Os01g0176700;Os02g0325600
vte2	TFmatrixID_0371	1175	+	0.997	acaGAATCtg	Myb/SANT	Os02g0796500;Os03g0224200;Os06g0183100
vte2	TFmatrixID_0382	1208	+	0.995	gaGTCAAga	NAC; NAM	Os01g0104200;Os01g0816100;Os03g0327800;Os05g0421600;Os07g0566500;Os07g0683200;Os11g0126900;Os11g0184900;Os12g0123700
vte2	TFmatrixID_0384	1031	+	0.782	aTTACTtgt	NAC; NAM	Os06g0101800;Os08g0157900
vte2	TFmatrixID_0388	1065	-	0.985	gCACGCtac	NAC; NAM	Os01g0104500;Os01g0393100;Os02g0579000;Os03g0327100;Os03g0624600;Os04g0460600;Os06g0344900;Os07g0684800;Os08g0511200;Os09g0497900;Os11g0127600;Os12g0123800
vte2	TFmatrixID_0389	1065	-	0.992	gCACGCtact	NAC; NAM	Os01g0104500;Os01g0393100;Os02g0579000;Os03g0327100;Os03g0624600;Os04g0460600;Os06g0344900;Os07g0684800;Os08g0511200;Os09g0497900
vte2	TFmatrixID_0390	1065	-	0.99	gCACGCtact	NAC; NAM	Os01g0104500;Os01g0393100;Os02g0579000;Os03g0327100;Os03g0624600;Os04g0460600;Os06g0344900;Os07g0684800;Os08g0511200;Os09g0497900;Os11g0127600;Os12g0123800
vte2	TFmatrixID_0391	1065	-	0.984	gCACGCtact	NAC; NAM	Os01g0104500;Os01g0393100;Os02g0579000;Os03g0327100;Os03g0624600;Os04g0460600;Os06g0344900;Os07g0684800;Os08g0511200;Os09g0497900
vte2	TFmatrixID_0392	1379	-	0.991	tttgACGCAa	NAC; NAM	13113.t00085;Os02g0252200;Os02g0643600;LOC_Os03g03540;Os06g0104200;Os06g0131700;Os06g0530400;Os08g0103900;Os08g0115800;Os10g0532000
vte2	TFmatrixID_0393	1065	-	0.983	gCACGCtact	NAC; NAM	Os01g0104500;Os01g0393100;Os02g0579000;Os03g0327100;Os03g0624600;Os04g0460600;Os06g0344900;Os07g0684800;Os08g0511200;Os09g0497900
vte2	TFmatrixID_0395	1063	-	0.987	tggCACGCta	NAC; NAM	Os01g0104500;Os01g0393100;Os02g0579000;Os03g0327100;Os03g0624600;Os04g0460600;Os06g0344900;Os07g0684800;Os08g0511200;Os09g0497900
vte2	TFmatrixID_0421	1083	-	0.989	tGGTGCcgca	TCP	Os01g0763200;Os03g0706500;Os03g0785800;Os05g0513100;LOC_Os07g04510;Os07g0152000;LOC_Os12g02090;Os12g0616400
vte2	TFmatrixID_0440	83	-	0.928	ttGGTCCa	TCP	Os01g0763200;Os03g0706500;Os03g0785800;Os05g0513100;LOC_Os07g04510;Os07g0152000;LOC_Os12g02090;Os12g0616400
vte2	TFmatrixID_0442	733	+	0.977	ttGTCAActa	WRKY	Os01g0182700;Os01g0185900;Os01g0186000;Os01g0246700;Os01g0289600;Os01g0584900;Os01g0586800;Os01g0624700;Os01g0626400;Os01g0665500;Os01g0714800;Os01g0730700;Os01g0734000;Os01g0750100;Os01g0820400;Os01g0820700;Os01g0972800;Os02g0181300;Os02g0265200;Os02g0462800;Os02g0698800;Os02g0770500;Os03g0335200;Os03g0741400;Os03g0758000;Os03g0798500;Os03g0855100;Os04g0287400;Os04g0545000;Os04g0597300;Os04g0605…
vte2	TFmatrixID_0445	1208	+	0.996	gaGTCAAg	WRKY	Os01g0182700;Os01g0185900;Os01g0186000;Os01g0246700;Os01g0289600;Os01g0584900;Os01g0586800;Os01g0624700;Os01g0626400;Os01g0665500;Os01g0714800;Os01g0730700;Os01g0734000;Os01g0750100;Os01g0820900;Os01g0972800;Os02g0181300;Os02g0265200;Os02g0462800;Os02g0698800;Os02g0770500;Os03g0741400;Os03g0758000;Os03g0798500;Os03g0855100;Os04g0287400;Os04g0545000;Os04g0597300;Os04g0605100;Os05g0137500;Os05g0183…
vte2	TFmatrixID_0447	732	+	0.983	gttGTCAAct	WRKY	Os01g0182700;Os01g0185900;Os01g0186000;Os01g0246700;Os01g0289600;Os01g0584900;Os01g0586800;Os01g0624700;Os01g0626400;Os01g0656400;Os01g0665500;Os01g0714800;Os01g0730700;Os01g0734000;Os01g0750100;Os01g0820400;Os01g0820700;Os01g0820900;Os01g0821300;Os01g0972800;Os02g0181300;Os02g0265200;Os02g0462800;Os02g0698800;Os02g0770500;Os03g0657400;Os03g0741400;Os03g0758000;Os03g0798500;Os03g0855100;Os04g0287…
vte2	TFmatrixID_0450	732	+	0.983	gttGTCAAct	WRKY	Os01g0182700;Os01g0185900;Os01g0186000;Os01g0246700;Os01g0289600;Os01g0584900;Os01g0586800;Os01g0624700;Os01g0626400;Os01g0665500;Os01g0714800;Os01g0730700;Os01g0734000;Os01g0750100;Os01g0820400;Os01g0820700;Os01g0820900;Os01g0821300;Os01g0972800;Os02g0181300;Os02g0265200;Os02g0462800;Os02g0698800;Os02g0770500;Os03g0335200;Os03g0657400;Os03g0741400;Os03g0758000;Os03g0798500;Os03g0855100;Os04g0287…
vte2	TFmatrixID_0455	732	+	0.948	gttGTCAActa	WRKY	Os01g0182700;Os01g0185900;Os01g0186000;Os01g0246700;Os01g0289600;Os01g0584900;Os01g0586800;Os01g0624700;Os01g0626400;Os01g0656400;Os01g0665500;Os01g0714800;Os01g0730700;Os01g0734000;Os01g0750100;Os01g0820400;Os01g0972800;Os02g0181300;Os02g0265200;Os02g0462800;Os02g0698800;Os02g0770500;Os03g0335200;Os03g0741400;Os03g0758000;Os03g0798500;Os03g0855100;Os04g0287400;Os04g0545000;Os04g0597300;Os04g0605…
vte2	TFmatrixID_0457	733	+	0.984	ttGTCAActa	WRKY	Os01g0182700;Os01g0185900;Os01g0186000;Os01g0246700;Os01g0289600;Os01g0584900;Os01g0586800;Os01g0624700;Os01g0626400;Os01g0656400;Os01g0665500;Os01g0714800;Os01g0730700;Os01g0734000;Os01g0750100;Os01g0820400;Os01g0820700;Os01g0820900;Os01g0821300;Os01g0972800;Os02g0181300;Os02g0265200;Os02g0462800;Os02g0698800;Os02g0770500;Os03g0335200;Os03g0657400;Os03g0741400;Os03g0758000;Os03g0798500;Os03g0855…
vte2	TFmatrixID_0459	733	+	0.938	ttGTCAAc	WRKY	Os01g0182700;Os01g0185900;Os01g0186000;Os01g0289600;Os01g0626400;Os01g0656400;Os01g0665500;Os01g0734000;Os01g0820400;Os01g0820700;Os01g0820900;Os01g0821300;Os01g0821600;Os01g0972800;Os02g0265200;Os03g0321700;Os03g0335200;Os03g0741400;Os03g0758000;Os04g0287400;Os04g0545000;Os05g0233100;LOC_Os05g25700;Os05g0322900;Os05g0478400;Os05g0478700;Os05g0478800;Os05g0571200;Os05g0583000;Os06g0158100;Os06g05…
vte2	TFmatrixID_0461	734	+	0.975	tGTCAActac	WRKY	Os01g0182700;Os01g0185900;Os01g0186000;Os01g0246700;Os01g0289600;Os01g0586800;Os01g0624700;Os01g0656400;Os01g0714800;Os01g0730700;Os01g0734000;Os01g0750100;Os01g0820400;Os01g0820700;Os01g0820900;Os01g0821300;Os01g0821600;Os01g0972800;Os02g0181300;Os02g0265200;Os02g0462800;Os02g0698800;Os02g0770500;Os03g0321700;Os03g0335200;Os03g0741400;Os03g0798500;Os03g0855100;Os04g0287400;Os04g0545000;Os04g0597…
vte2	TFmatrixID_0467	732	+	0.916	gttGTCAActaca	WRKY	Os01g0656400
vte2	TFmatrixID_0490	557	-	0.989	tGACGTt	bZIP	Os01g0279900;Os01g0808100;Os01g0859500;Os02g0194900;Os03g0318600;Os04g0637000;Os05g0443850;Os05g0492000;Os06g0265400;Os06g0614100;Os07g0687700;Os08g0176900;Os09g0280500;Os09g0489500;Os11g0152700;Os12g0152900
vte2	TFmatrixID_0490	1094	+	0.989	aACGTCa	bZIP	Os01g0279900;Os01g0808100;Os01g0859500;Os02g0194900;Os03g0318600;Os04g0637000;Os05g0443850;Os05g0492000;Os06g0265400;Os06g0614100;Os07g0687700;Os08g0176900;Os09g0280500;Os09g0489500;Os11g0152700;Os12g0152900
vte2	TFmatrixID_0493	237	-	0.884	TTTCCtagttgggtt	MADS box; MIKC; M-type	Os01g0201700;Os01g0883100;Os01g0886200;Os02g0104100;Os02g0170300;Os02g0682200;Os02g0731200;Os03g0122600;Os03g0752800;Os04g0580700;Os04g0614100;Os05g0203800;Os06g0162800;Os06g0667200;Os07g0108900;Os08g0431900;Os08g0531700;Os09g0507200;Os10g0536100;Os12g0207000;Os12g0501700
vte2	TFmatrixID_0500	234	-	0.826	attTTTCCtagttgggttat	MADS box; MIKC; M-type	Os02g0104100;Os02g0170300;Os02g0579600;Os02g0682200;Os02g0731200;Os03g0122600;Os03g0186600;Os04g0461300;Os04g0580700;Os06g0217300;Os06g0712700;Os08g0431900;Os08g0531700;Os09g0507200;Os10g0536100
vte2	TFmatrixID_0518	2	+	0.755	tgatgaaATGATcagttct	bZIP; Homeodomain; HD-ZIP	Os03g0109400;Os03g0640800;Os10g0480200;Os12g0612700
vte2	TFmatrixID_0518	632	+	0.792	atctgagATGATtgctgat	bZIP; Homeodomain; HD-ZIP	Os03g0109400;Os03g0640800;Os10g0480200;Os12g0612700
vte2	TFmatrixID_0522	223	-	0.892	atgtcGGTACaatttt	SBP	Os01g0922600;Os02g0177300;Os03g0833300;Os04g0551500;Os04g0656500;Os06g0659100;LOC_Os07g32170;Os08g0509600;Os08g0513700;Os08g0531600;Os09g0507100
vte2	TFmatrixID_0524	440	+	0.868	tggGCTGAgcc	Myb/SANT	Os04g0348300
vte2	TFmatrixID_0528	542	-	0.994	ttctCAGGTgaa	AP2; B3; RAV	Os01g0140700;Os01g0141000;Os01g0693400
vte2	TFmatrixID_0528	1126	-	0.978	tcaaCAGGTgta	AP2; B3; RAV	Os01g0140700;Os01g0141000;Os01g0693400
vte2	TFmatrixID_0533	554	-	0.973	gccTGACGttg	bZIP	Os01g0279900;Os01g0808100;Os01g0859500;Os02g0194900;Os03g0318600;Os04g0637000;Os05g0443850;Os05g0492000;Os06g0265400;Os06g0614100;Os07g0687700;Os08g0176900;Os09g0280500;Os09g0489500;Os11g0152700;Os12g0152900
vte2	TFmatrixID_0533	1093	+	0.95	caaCGTCAaat	bZIP	Os01g0279900;Os01g0808100;Os01g0859500;Os02g0194900;Os03g0318600;Os04g0637000;Os05g0443850;Os05g0492000;Os06g0265400;Os06g0614100;Os07g0687700;Os08g0176900;Os09g0280500;Os09g0489500;Os11g0152700;Os12g0152900
vte2	TFmatrixID_0542	2	+	0.755	tgatgaaATGATcagttct	bZIP; Homeodomain; HD-ZIP	Os03g0109400;Os03g0640800;Os10g0480200;Os12g0612700
vte2	TFmatrixID_0542	632	+	0.792	atctgagATGATtgctgat	bZIP; Homeodomain; HD-ZIP	Os03g0109400;Os03g0640800;Os10g0480200;Os12g0612700
vte2	TFmatrixID_0547	440	+	0.868	tggGCTGAgcc	Myb/SANT	Os04g0348300
vte2	TFmatrixID_0561	542	-	0.994	ttctCAGGTgaa	AP2; B3; RAV	Os01g0140700;Os01g0141000;Os01g0693400
vte2	TFmatrixID_0561	1126	-	0.978	tcaaCAGGTgta	AP2; B3; RAV	Os01g0140700;Os01g0141000;Os01g0693400
vte2	TFmatrixID_0569	904	+	0.951	gtATAAAggatgctc	TBP	Os10g0432300;Os12g0580300
vte2	TFmatrixID_0569	1346	+	0.978	ttATAAAaaaaaaat	TBP	Os10g0432300;Os12g0580300
vte2	TFmatrixID_0570	1345	+	0.933	tttaTAAAAa	TBP	Os10g0432300;Os12g0580300
vte2	TFmatrixID_0575	1380	-	0.91	ttgacGCAAT	AT-Hook	Os07g0184800
vte2	TFmatrixID_0580	519	+	1	aAAATAc	AT-Hook	Os01g0835600
vte2	TFmatrixID_0585	903	+	0.95	cgtATAAAgga	TBP	Os10g0432300;Os12g0580300
vte2	TFmatrixID_0585	1345	+	0.948	tttATAAAaaa	TBP	Os10g0432300;Os12g0580300
vte2	TF_motif_seq_0086	580	-	0.727	tcataaACGGA	(Others)	X52153
vte2	TF_motif_seq_0246	67	-	1	TGTCA	Homeodomain; TALE	Os03g0727000
vte2	TF_motif_seq_0246	145	-	1	AGTCA	Homeodomain; TALE	Os03g0727000
vte2	TF_motif_seq_0246	353	-	1	TGTCA	Homeodomain; TALE	Os03g0727000
vte2	TF_motif_seq_0246	557	+	1	TGACG	Homeodomain; TALE	Os03g0727000
vte2	TF_motif_seq_0246	565	-	1	TGTCA	Homeodomain; TALE	Os03g0727000
vte2	TF_motif_seq_0246	578	-	1	CGTCA	Homeodomain; TALE	Os03g0727000
vte2	TF_motif_seq_0246	734	-	1	TGTCA	Homeodomain; TALE	Os03g0727000
vte2	TF_motif_seq_0246	775	+	1	TGACA	Homeodomain; TALE	Os03g0727000
vte2	TF_motif_seq_0246	860	+	1	TGACC	Homeodomain; TALE	Os03g0727000
vte2	TF_motif_seq_0246	960	-	1	TGTCA	Homeodomain; TALE	Os03g0727000
vte2	TF_motif_seq_0246	1019	-	1	AGTCA	Homeodomain; TALE	Os03g0727000
vte2	TF_motif_seq_0246	1096	-	1	CGTCA	Homeodomain; TALE	Os03g0727000
vte2	TF_motif_seq_0246	1152	-	1	AGTCA	Homeodomain; TALE	Os03g0727000
vte2	TF_motif_seq_0246	1209	-	1	AGTCA	Homeodomain; TALE	Os03g0727000
vte2	TF_motif_seq_0246	1302	-	1	GGTCA	Homeodomain; TALE	Os03g0727000
vte2	TF_motif_seq_0246	1381	+	1	TGACG	Homeodomain; TALE	Os03g0727000
vte2	TF_motif_seq_0256	31	+	0.8	CTTGC	B3	Os04g0676600;Os08g0101000
vte2	TF_motif_seq_0256	43	+	0.8	CATAC	B3	Os04g0676600;Os08g0101000
vte2	TF_motif_seq_0256	48	+	0.8	AATGC	B3	Os04g0676600;Os08g0101000
vte2	TF_motif_seq_0256	59	-	0.8	GAATG	B3	Os04g0676600;Os08g0101000
vte2	TF_motif_seq_0256	113	+	0.8	AATGC	B3	Os04g0676600;Os08g0101000
vte2	TF_motif_seq_0256	122	-	0.8	GAATG	B3	Os04g0676600;Os08g0101000
vte2	TF_motif_seq_0256	131	+	0.8	CAAGC	B3	Os04g0676600;Os08g0101000
vte2	TF_motif_seq_0256	137	-	0.8	GAATG	B3	Os04g0676600;Os08g0101000
vte2	TF_motif_seq_0256	171	+	0.8	TATGC	B3	Os04g0676600;Os08g0101000
vte2	TF_motif_seq_0256	186	+	0.8	AATGC	B3	Os04g0676600;Os08g0101000
vte2	TF_motif_seq_0256	254	+	0.8	CTTGC	B3	Os04g0676600;Os08g0101000
vte2	TF_motif_seq_0256	312	-	0.8	GCATT	B3	Os04g0676600;Os08g0101000
vte2	TF_motif_seq_0256	341	+	0.8	CAAGC	B3	Os04g0676600;Os08g0101000
vte2	TF_motif_seq_0256	344	-	0.8	GCCTG	B3	Os04g0676600;Os08g0101000
vte2	TF_motif_seq_0256	367	-	0.8	CCATG	B3	Os04g0676600;Os08g0101000
vte2	TF_motif_seq_0256	368	+	1	CATGC	B3	Os04g0676600;Os08g0101000
vte2	TF_motif_seq_0256	371	-	0.8	GCTTG	B3	Os04g0676600;Os08g0101000
vte2	TF_motif_seq_0256	372	+	0.8	CTTGC	B3	Os04g0676600;Os08g0101000
vte2	TF_motif_seq_0256	380	-	0.8	GTATG	B3	Os04g0676600;Os08g0101000
vte2	TF_motif_seq_0256	381	+	0.8	TATGC	B3	Os04g0676600;Os08g0101000
vte2	TF_motif_seq_0256	389	-	0.8	GAATG	B3	Os04g0676600;Os08g0101000
vte2	TF_motif_seq_0256	403	-	0.8	GCAAG	B3	Os04g0676600;Os08g0101000
vte2	TF_motif_seq_0256	481	-	0.8	ACATG	B3	Os04g0676600;Os08g0101000
vte2	TF_motif_seq_0256	482	+	0.8	CATGT	B3	Os04g0676600;Os08g0101000
vte2	TF_motif_seq_0256	485	-	0.8	GTATG	B3	Os04g0676600;Os08g0101000
vte2	TF_motif_seq_0256	486	+	0.8	TATGC	B3	Os04g0676600;Os08g0101000
vte2	TF_motif_seq_0256	554	-	0.8	GCCTG	B3	Os04g0676600;Os08g0101000
vte2	TF_motif_seq_0256	595	-	0.8	GCAAG	B3	Os04g0676600;Os08g0101000
vte2	TF_motif_seq_0256	596	+	0.8	CAAGC	B3	Os04g0676600;Os08g0101000
vte2	TF_motif_seq_0256	599	-	0.8	GCAAG	B3	Os04g0676600;Os08g0101000
vte2	TF_motif_seq_0256	652	-	1	GCATG	B3	Os04g0676600;Os08g0101000
vte2	TF_motif_seq_0256	653	+	0.8	CATGG	B3	Os04g0676600;Os08g0101000
vte2	TF_motif_seq_0256	660	-	0.8	CCATG	B3	Os04g0676600;Os08g0101000
vte2	TF_motif_seq_0256	661	+	0.8	CATGT	B3	Os04g0676600;Os08g0101000
vte2	TF_motif_seq_0256	703	-	0.8	GCCTG	B3	Os04g0676600;Os08g0101000
vte2	TF_motif_seq_0256	723	-	0.8	GCAAG	B3	Os04g0676600;Os08g0101000
vte2	TF_motif_seq_0256	742	-	0.8	ACATG	B3	Os04g0676600;Os08g0101000
vte2	TF_motif_seq_0256	743	+	0.8	CATGA	B3	Os04g0676600;Os08g0101000
vte2	TF_motif_seq_0256	778	+	0.8	CATAC	B3	Os04g0676600;Os08g0101000
vte2	TF_motif_seq_0256	812	+	0.8	CAAGC	B3	Os04g0676600;Os08g0101000
vte2	TF_motif_seq_0256	818	-	0.8	GTATG	B3	Os04g0676600;Os08g0101000
vte2	TF_motif_seq_0256	889	-	0.8	ACATG	B3	Os04g0676600;Os08g0101000
vte2	TF_motif_seq_0256	890	+	1	CATGC	B3	Os04g0676600;Os08g0101000
vte2	TF_motif_seq_0256	893	-	0.8	GCTTG	B3	Os04g0676600;Os08g0101000
vte2	TF_motif_seq_0256	911	-	0.8	GGATG	B3	Os04g0676600;Os08g0101000
vte2	TF_motif_seq_0256	912	+	0.8	GATGC	B3	Os04g0676600;Os08g0101000
vte2	TF_motif_seq_0256	938	+	0.8	TATGC	B3	Os04g0676600;Os08g0101000
vte2	TF_motif_seq_0256	1045	-	0.8	GCCTG	B3	Os04g0676600;Os08g0101000
vte2	TF_motif_seq_0256	1046	+	0.8	CCTGC	B3	Os04g0676600;Os08g0101000
vte2	TF_motif_seq_0256	1049	-	0.8	GCATT	B3	Os04g0676600;Os08g0101000
vte2	TF_motif_seq_0256	1056	-	0.8	CCATG	B3	Os04g0676600;Os08g0101000
vte2	TF_motif_seq_0256	1057	+	0.8	CATGG	B3	Os04g0676600;Os08g0101000
vte2	TF_motif_seq_0256	1065	-	0.8	GCACG	B3	Os04g0676600;Os08g0101000
vte2	TF_motif_seq_0256	1066	+	0.8	CACGC	B3	Os04g0676600;Os08g0101000
vte2	TF_motif_seq_0256	1157	+	0.8	CATTC	B3	Os04g0676600;Os08g0101000
vte2	TF_motif_seq_0256	1251	-	0.8	GCATT	B3	Os04g0676600;Os08g0101000
vte2	TF_motif_seq_0256	1281	-	0.8	CCATG	B3	Os04g0676600;Os08g0101000
vte2	TF_motif_seq_0256	1282	+	0.8	CATGT	B3	Os04g0676600;Os08g0101000
vte2	TF_motif_seq_0256	1313	+	0.8	TATGC	B3	Os04g0676600;Os08g0101000
vte2	TF_motif_seq_0256	1316	-	0.8	GCTTG	B3	Os04g0676600;Os08g0101000
vte2	TF_motif_seq_0256	1320	-	0.8	GAATG	B3	Os04g0676600;Os08g0101000
vte2	TF_motif_seq_0256	1369	-	0.8	CCATG	B3	Os04g0676600;Os08g0101000
vte2	TF_motif_seq_0256	1370	+	0.8	CATGT	B3	Os04g0676600;Os08g0101000
vte2	TF_motif_seq_0257	46	+	0.8	ACAAT	NF-YB	Os01g0834400;Os02g0725900;Os05g0463800;Os05g0573500
vte2	TF_motif_seq_0257	82	-	1	ATTGG	NF-YB	Os01g0834400;Os02g0725900;Os05g0463800;Os05g0573500
vte2	TF_motif_seq_0257	88	+	0.8	CCACT	NF-YB	Os01g0834400;Os02g0725900;Os05g0463800;Os05g0573500
vte2	TF_motif_seq_0257	123	-	0.8	AATGG	NF-YB	Os01g0834400;Os02g0725900;Os05g0463800;Os05g0573500
vte2	TF_motif_seq_0257	136	+	0.8	CGAAT	NF-YB	Os01g0834400;Os02g0725900;Os05g0463800;Os05g0573500
vte2	TF_motif_seq_0257	164	+	0.8	CCAGT	NF-YB	Os01g0834400;Os02g0725900;Os05g0463800;Os05g0573500
vte2	TF_motif_seq_0257	184	+	0.8	GCAAT	NF-YB	Os01g0834400;Os02g0725900;Os05g0463800;Os05g0573500
vte2	TF_motif_seq_0257	231	+	0.8	ACAAT	NF-YB	Os01g0834400;Os02g0725900;Os05g0463800;Os05g0573500
vte2	TF_motif_seq_0257	244	-	0.8	GTTGG	NF-YB	Os01g0834400;Os02g0725900;Os05g0463800;Os05g0573500
vte2	TF_motif_seq_0257	293	-	0.8	ATTAG	NF-YB	Os01g0834400;Os02g0725900;Os05g0463800;Os05g0573500
vte2	TF_motif_seq_0257	375	+	0.8	GCAAT	NF-YB	Os01g0834400;Os02g0725900;Os05g0463800;Os05g0573500
vte2	TF_motif_seq_0257	390	-	0.8	AATGG	NF-YB	Os01g0834400;Os02g0725900;Os05g0463800;Os05g0573500
vte2	TF_motif_seq_0257	426	+	0.8	TCAAT	NF-YB	Os01g0834400;Os02g0725900;Os05g0463800;Os05g0573500
vte2	TF_motif_seq_0257	438	-	0.8	AGTGG	NF-YB	Os01g0834400;Os02g0725900;Os05g0463800;Os05g0573500
vte2	TF_motif_seq_0257	456	+	0.8	CTAAT	NF-YB	Os01g0834400;Os02g0725900;Os05g0463800;Os05g0573500
vte2	TF_motif_seq_0257	476	-	0.8	AATGG	NF-YB	Os01g0834400;Os02g0725900;Os05g0463800;Os05g0573500
vte2	TF_motif_seq_0257	490	+	0.8	CCAAG	NF-YB	Os01g0834400;Os02g0725900;Os05g0463800;Os05g0573500
vte2	TF_motif_seq_0257	496	+	1	CCAAT	NF-YB	Os01g0834400;Os02g0725900;Os05g0463800;Os05g0573500
vte2	TF_motif_seq_0257	505	-	0.8	CTTGG	NF-YB	Os01g0834400;Os02g0725900;Os05g0463800;Os05g0573500
vte2	TF_motif_seq_0257	629	+	0.8	CCTAT	NF-YB	Os01g0834400;Os02g0725900;Os05g0463800;Os05g0573500
vte2	TF_motif_seq_0257	642	-	0.8	ATTGC	NF-YB	Os01g0834400;Os02g0725900;Os05g0463800;Os05g0573500
vte2	TF_motif_seq_0257	673	+	0.8	CCTAT	NF-YB	Os01g0834400;Os02g0725900;Os05g0463800;Os05g0573500
vte2	TF_motif_seq_0257	687	-	0.8	GTTGG	NF-YB	Os01g0834400;Os02g0725900;Os05g0463800;Os05g0573500
vte2	TF_motif_seq_0257	765	+	0.8	CCTAT	NF-YB	Os01g0834400;Os02g0725900;Os05g0463800;Os05g0573500
vte2	TF_motif_seq_0257	811	+	0.8	CCAAG	NF-YB	Os01g0834400;Os02g0725900;Os05g0463800;Os05g0573500
vte2	TF_motif_seq_0257	863	+	0.8	CCAAA	NF-YB	Os01g0834400;Os02g0725900;Os05g0463800;Os05g0573500
vte2	TF_motif_seq_0257	917	+	0.8	TCAAT	NF-YB	Os01g0834400;Os02g0725900;Os05g0463800;Os05g0573500
vte2	TF_motif_seq_0257	920	-	0.8	ATTTG	NF-YB	Os01g0834400;Os02g0725900;Os05g0463800;Os05g0573500
vte2	TF_motif_seq_0257	921	-	0.8	TTTGG	NF-YB	Os01g0834400;Os02g0725900;Os05g0463800;Os05g0573500
vte2	TF_motif_seq_0257	942	+	0.8	CCAAC	NF-YB	Os01g0834400;Os02g0725900;Os05g0463800;Os05g0573500
vte2	TF_motif_seq_0257	1002	+	0.8	CCAAG	NF-YB	Os01g0834400;Os02g0725900;Os05g0463800;Os05g0573500
vte2	TF_motif_seq_0257	1012	-	0.8	ATAGG	NF-YB	Os01g0834400;Os02g0725900;Os05g0463800;Os05g0573500
vte2	TF_motif_seq_0257	1051	-	0.8	ATTTG	NF-YB	Os01g0834400;Os02g0725900;Os05g0463800;Os05g0573500
vte2	TF_motif_seq_0257	1058	-	0.8	ATGGG	NF-YB	Os01g0834400;Os02g0725900;Os05g0463800;Os05g0573500
vte2	TF_motif_seq_0257	1078	+	0.8	CCAAA	NF-YB	Os01g0834400;Os02g0725900;Os05g0463800;Os05g0573500
vte2	TF_motif_seq_0257	1079	+	0.8	CAAAT	NF-YB	Os01g0834400;Os02g0725900;Os05g0463800;Os05g0573500
vte2	TF_motif_seq_0257	1081	-	0.8	AATGG	NF-YB	Os01g0834400;Os02g0725900;Os05g0463800;Os05g0573500
vte2	TF_motif_seq_0257	1099	+	0.8	CAAAT	NF-YB	Os01g0834400;Os02g0725900;Os05g0463800;Os05g0573500
vte2	TF_motif_seq_0257	1106	-	0.8	AATGG	NF-YB	Os01g0834400;Os02g0725900;Os05g0463800;Os05g0573500
vte2	TF_motif_seq_0257	1158	-	0.8	ATTCG	NF-YB	Os01g0834400;Os02g0725900;Os05g0463800;Os05g0573500
vte2	TF_motif_seq_0257	1189	-	0.8	ATTGT	NF-YB	Os01g0834400;Os02g0725900;Os05g0463800;Os05g0573500
vte2	TF_motif_seq_0257	1194	+	0.8	CCGAT	NF-YB	Os01g0834400;Os02g0725900;Os05g0463800;Os05g0573500
vte2	TF_motif_seq_0257	1197	-	0.8	ATTGT	NF-YB	Os01g0834400;Os02g0725900;Os05g0463800;Os05g0573500
vte2	TF_motif_seq_0257	1216	-	0.8	ATTGA	NF-YB	Os01g0834400;Os02g0725900;Os05g0463800;Os05g0573500
vte2	TF_motif_seq_0257	1220	-	0.8	ATTTG	NF-YB	Os01g0834400;Os02g0725900;Os05g0463800;Os05g0573500
vte2	TF_motif_seq_0257	1240	-	0.8	ATCGG	NF-YB	Os01g0834400;Os02g0725900;Os05g0463800;Os05g0573500
vte2	TF_motif_seq_0257	1257	+	0.8	TCAAT	NF-YB	Os01g0834400;Os02g0725900;Os05g0463800;Os05g0573500
vte2	TF_motif_seq_0257	1271	-	0.8	ACTGG	NF-YB	Os01g0834400;Os02g0725900;Os05g0463800;Os05g0573500
vte2	TF_motif_seq_0257	1276	-	0.8	ATTGT	NF-YB	Os01g0834400;Os02g0725900;Os05g0463800;Os05g0573500
vte2	TF_motif_seq_0257	1321	-	0.8	AATGG	NF-YB	Os01g0834400;Os02g0725900;Os05g0463800;Os05g0573500
vte2	TF_motif_seq_0257	1331	-	0.8	ATAGG	NF-YB	Os01g0834400;Os02g0725900;Os05g0463800;Os05g0573500
vte2	TF_motif_seq_0257	1385	+	0.8	GCAAT	NF-YB	Os01g0834400;Os02g0725900;Os05g0463800;Os05g0573500
vte2	TF_motif_seq_0257	1418	+	0.8	CCATT	NF-YB	Os01g0834400;Os02g0725900;Os05g0463800;Os05g0573500
vte2	TF_motif_seq_0257	1420	-	0.8	ATTGA	NF-YB	Os01g0834400;Os02g0725900;Os05g0463800;Os05g0573500
vte2	TF_motif_seq_0257	1444	-	1	ATTGG	NF-YB	Os01g0834400;Os02g0725900;Os05g0463800;Os05g0573500
vte2	TF_motif_seq_0257	1457	-	0.8	ATTGC	NF-YB	Os01g0834400;Os02g0725900;Os05g0463800;Os05g0573500
vte2	TF_motif_seq_0266	85	+	1	GGTCC	TCP	Os03g0785800;Os04g0194600;Os12g0616400;Os01g0213800;Os08g0544800;Os11g0175700
vte2	TF_motif_seq_0266	85	-	1	GGTCC	TCP	Os03g0785800;Os04g0194600;Os12g0616400;Os01g0213800;Os08g0544800;Os11g0175700
vte2	TF_motif_seq_0266	97	+	0.75	AGTCC	TCP	Os03g0785800;Os04g0194600;Os12g0616400;Os01g0213800;Os08g0544800;Os11g0175700
vte2	TF_motif_seq_0266	97	-	0.75	AGTCC	TCP	Os03g0785800;Os04g0194600;Os12g0616400;Os01g0213800;Os08g0544800;Os11g0175700
vte2	TF_motif_seq_0266	161	+	0.75	GCTCC	TCP	Os03g0785800;Os04g0194600;Os12g0616400;Os01g0213800;Os08g0544800;Os11g0175700
vte2	TF_motif_seq_0266	161	-	0.75	GCTCC	TCP	Os03g0785800;Os04g0194600;Os12g0616400;Os01g0213800;Os08g0544800;Os11g0175700
vte2	TF_motif_seq_0266	228	+	0.75	GGTAC	TCP	Os03g0785800;Os04g0194600;Os12g0616400;Os01g0213800;Os08g0544800;Os11g0175700
vte2	TF_motif_seq_0266	228	-	0.75	GGTAC	TCP	Os03g0785800;Os04g0194600;Os12g0616400;Os01g0213800;Os08g0544800;Os11g0175700
vte2	TF_motif_seq_0266	259	+	0.75	GGACA	TCP	Os03g0785800;Os04g0194600;Os12g0616400;Os01g0213800;Os08g0544800;Os11g0175700
vte2	TF_motif_seq_0266	259	-	0.75	GGACA	TCP	Os03g0785800;Os04g0194600;Os12g0616400;Os01g0213800;Os08g0544800;Os11g0175700
vte2	TF_motif_seq_0266	284	+	0.75	GTGCC	TCP	Os03g0785800;Os04g0194600;Os12g0616400;Os01g0213800;Os08g0544800;Os11g0175700
vte2	TF_motif_seq_0266	284	-	0.75	GTGCC	TCP	Os03g0785800;Os04g0194600;Os12g0616400;Os01g0213800;Os08g0544800;Os11g0175700
vte2	TF_motif_seq_0266	329	+	0.75	GGCAC	TCP	Os03g0785800;Os04g0194600;Os12g0616400;Os01g0213800;Os08g0544800;Os11g0175700
vte2	TF_motif_seq_0266	329	-	0.75	GGCAC	TCP	Os03g0785800;Os04g0194600;Os12g0616400;Os01g0213800;Os08g0544800;Os11g0175700
vte2	TF_motif_seq_0266	406	+	0.75	AGGCC	TCP	Os03g0785800;Os04g0194600;Os12g0616400;Os01g0213800;Os08g0544800;Os11g0175700
vte2	TF_motif_seq_0266	406	-	0.75	AGGCC	TCP	Os03g0785800;Os04g0194600;Os12g0616400;Os01g0213800;Os08g0544800;Os11g0175700
vte2	TF_motif_seq_0266	407	+	0.75	GGCCA	TCP	Os03g0785800;Os04g0194600;Os12g0616400;Os01g0213800;Os08g0544800;Os11g0175700
vte2	TF_motif_seq_0266	407	-	0.75	GGCCA	TCP	Os03g0785800;Os04g0194600;Os12g0616400;Os01g0213800;Os08g0544800;Os11g0175700
vte2	TF_motif_seq_0266	441	+	0.75	GGGCT	TCP	Os03g0785800;Os04g0194600;Os12g0616400;Os01g0213800;Os08g0544800;Os11g0175700
vte2	TF_motif_seq_0266	441	-	0.75	GGGCT	TCP	Os03g0785800;Os04g0194600;Os12g0616400;Os01g0213800;Os08g0544800;Os11g0175700
vte2	TF_motif_seq_0266	446	+	0.75	GAGCC	TCP	Os03g0785800;Os04g0194600;Os12g0616400;Os01g0213800;Os08g0544800;Os11g0175700
vte2	TF_motif_seq_0266	446	-	0.75	GAGCC	TCP	Os03g0785800;Os04g0194600;Os12g0616400;Os01g0213800;Os08g0544800;Os11g0175700
vte2	TF_motif_seq_0266	447	+	0.75	AGCCC	TCP	Os03g0785800;Os04g0194600;Os12g0616400;Os01g0213800;Os08g0544800;Os11g0175700
vte2	TF_motif_seq_0266	447	-	0.75	AGCCC	TCP	Os03g0785800;Os04g0194600;Os12g0616400;Os01g0213800;Os08g0544800;Os11g0175700
vte2	TF_motif_seq_0266	479	+	0.75	GGACA	TCP	Os03g0785800;Os04g0194600;Os12g0616400;Os01g0213800;Os08g0544800;Os11g0175700
vte2	TF_motif_seq_0266	479	-	0.75	GGACA	TCP	Os03g0785800;Os04g0194600;Os12g0616400;Os01g0213800;Os08g0544800;Os11g0175700
vte2	TF_motif_seq_0266	493	+	0.75	AGTCC	TCP	Os03g0785800;Os04g0194600;Os12g0616400;Os01g0213800;Os08g0544800;Os11g0175700
vte2	TF_motif_seq_0266	493	-	0.75	AGTCC	TCP	Os03g0785800;Os04g0194600;Os12g0616400;Os01g0213800;Os08g0544800;Os11g0175700
vte2	TF_motif_seq_0266	603	+	0.75	GGTCT	TCP	Os03g0785800;Os04g0194600;Os12g0616400;Os01g0213800;Os08g0544800;Os11g0175700
vte2	TF_motif_seq_0266	603	-	0.75	GGTCT	TCP	Os03g0785800;Os04g0194600;Os12g0616400;Os01g0213800;Os08g0544800;Os11g0175700
vte2	TF_motif_seq_0266	625	+	0.75	GGATC	TCP	Os03g0785800;Os04g0194600;Os12g0616400;Os01g0213800;Os08g0544800;Os11g0175700
vte2	TF_motif_seq_0266	625	-	0.75	GGATC	TCP	Os03g0785800;Os04g0194600;Os12g0616400;Os01g0213800;Os08g0544800;Os11g0175700
vte2	TF_motif_seq_0266	626	+	0.75	GATCC	TCP	Os03g0785800;Os04g0194600;Os12g0616400;Os01g0213800;Os08g0544800;Os11g0175700
vte2	TF_motif_seq_0266	626	-	0.75	GATCC	TCP	Os03g0785800;Os04g0194600;Os12g0616400;Os01g0213800;Os08g0544800;Os11g0175700
vte2	TF_motif_seq_0266	656	+	0.75	GGCTC	TCP	Os03g0785800;Os04g0194600;Os12g0616400;Os01g0213800;Os08g0544800;Os11g0175700
vte2	TF_motif_seq_0266	656	-	0.75	GGCTC	TCP	Os03g0785800;Os04g0194600;Os12g0616400;Os01g0213800;Os08g0544800;Os11g0175700
vte2	TF_motif_seq_0266	657	+	0.75	GCTCC	TCP	Os03g0785800;Os04g0194600;Os12g0616400;Os01g0213800;Os08g0544800;Os11g0175700
vte2	TF_motif_seq_0266	657	-	0.75	GCTCC	TCP	Os03g0785800;Os04g0194600;Os12g0616400;Os01g0213800;Os08g0544800;Os11g0175700
vte2	TF_motif_seq_0266	770	+	0.75	GGAGC	TCP	Os03g0785800;Os04g0194600;Os12g0616400;Os01g0213800;Os08g0544800;Os11g0175700
vte2	TF_motif_seq_0266	770	-	0.75	GGAGC	TCP	Os03g0785800;Os04g0194600;Os12g0616400;Os01g0213800;Os08g0544800;Os11g0175700
vte2	TF_motif_seq_0266	826	+	0.75	AGGCC	TCP	Os03g0785800;Os04g0194600;Os12g0616400;Os01g0213800;Os08g0544800;Os11g0175700
vte2	TF_motif_seq_0266	826	-	0.75	AGGCC	TCP	Os03g0785800;Os04g0194600;Os12g0616400;Os01g0213800;Os08g0544800;Os11g0175700
vte2	TF_motif_seq_0266	827	+	1	GGCCC	TCP	Os03g0785800;Os04g0194600;Os12g0616400;Os01g0213800;Os08g0544800;Os11g0175700
vte2	TF_motif_seq_0266	827	-	1	GGCCC	TCP	Os03g0785800;Os04g0194600;Os12g0616400;Os01g0213800;Os08g0544800;Os11g0175700
vte2	TF_motif_seq_0266	836	+	0.75	GTTCC	TCP	Os03g0785800;Os04g0194600;Os12g0616400;Os01g0213800;Os08g0544800;Os11g0175700
vte2	TF_motif_seq_0266	836	-	0.75	GTTCC	TCP	Os03g0785800;Os04g0194600;Os12g0616400;Os01g0213800;Os08g0544800;Os11g0175700
vte2	TF_motif_seq_0266	860	+	0.75	TGACC	TCP	Os03g0785800;Os04g0194600;Os12g0616400;Os01g0213800;Os08g0544800;Os11g0175700
vte2	TF_motif_seq_0266	860	-	0.75	TGACC	TCP	Os03g0785800;Os04g0194600;Os12g0616400;Os01g0213800;Os08g0544800;Os11g0175700
vte2	TF_motif_seq_0266	899	+	0.75	AGCCC	TCP	Os03g0785800;Os04g0194600;Os12g0616400;Os01g0213800;Os08g0544800;Os11g0175700
vte2	TF_motif_seq_0266	899	-	0.75	AGCCC	TCP	Os03g0785800;Os04g0194600;Os12g0616400;Os01g0213800;Os08g0544800;Os11g0175700
vte2	TF_motif_seq_0266	1043	+	0.75	GAGCC	TCP	Os03g0785800;Os04g0194600;Os12g0616400;Os01g0213800;Os08g0544800;Os11g0175700
vte2	TF_motif_seq_0266	1043	-	0.75	GAGCC	TCP	Os03g0785800;Os04g0194600;Os12g0616400;Os01g0213800;Os08g0544800;Os11g0175700
vte2	TF_motif_seq_0266	1064	+	0.75	GGCAC	TCP	Os03g0785800;Os04g0194600;Os12g0616400;Os01g0213800;Os08g0544800;Os11g0175700
vte2	TF_motif_seq_0266	1064	-	0.75	GGCAC	TCP	Os03g0785800;Os04g0194600;Os12g0616400;Os01g0213800;Os08g0544800;Os11g0175700
vte2	TF_motif_seq_0266	1075	+	0.75	GCACC	TCP	Os03g0785800;Os04g0194600;Os12g0616400;Os01g0213800;Os08g0544800;Os11g0175700
vte2	TF_motif_seq_0266	1075	-	0.75	GCACC	TCP	Os03g0785800;Os04g0194600;Os12g0616400;Os01g0213800;Os08g0544800;Os11g0175700
vte2	TF_motif_seq_0266	1084	+	0.75	GGTGC	TCP	Os03g0785800;Os04g0194600;Os12g0616400;Os01g0213800;Os08g0544800;Os11g0175700
vte2	TF_motif_seq_0266	1084	-	0.75	GGTGC	TCP	Os03g0785800;Os04g0194600;Os12g0616400;Os01g0213800;Os08g0544800;Os11g0175700
vte2	TF_motif_seq_0266	1085	+	0.75	GTGCC	TCP	Os03g0785800;Os04g0194600;Os12g0616400;Os01g0213800;Os08g0544800;Os11g0175700
vte2	TF_motif_seq_0266	1085	-	0.75	GTGCC	TCP	Os03g0785800;Os04g0194600;Os12g0616400;Os01g0213800;Os08g0544800;Os11g0175700
vte2	TF_motif_seq_0266	1164	+	0.75	GGTGC	TCP	Os03g0785800;Os04g0194600;Os12g0616400;Os01g0213800;Os08g0544800;Os11g0175700
vte2	TF_motif_seq_0266	1164	-	0.75	GGTGC	TCP	Os03g0785800;Os04g0194600;Os12g0616400;Os01g0213800;Os08g0544800;Os11g0175700
vte2	TF_motif_seq_0266	1165	+	0.75	GTGCC	TCP	Os03g0785800;Os04g0194600;Os12g0616400;Os01g0213800;Os08g0544800;Os11g0175700
vte2	TF_motif_seq_0266	1165	-	0.75	GTGCC	TCP	Os03g0785800;Os04g0194600;Os12g0616400;Os01g0213800;Os08g0544800;Os11g0175700
vte2	TF_motif_seq_0266	1191	+	0.75	TGTCC	TCP	Os03g0785800;Os04g0194600;Os12g0616400;Os01g0213800;Os08g0544800;Os11g0175700
vte2	TF_motif_seq_0266	1191	-	0.75	TGTCC	TCP	Os03g0785800;Os04g0194600;Os12g0616400;Os01g0213800;Os08g0544800;Os11g0175700
vte2	TF_motif_seq_0266	1269	+	0.75	GGACT	TCP	Os03g0785800;Os04g0194600;Os12g0616400;Os01g0213800;Os08g0544800;Os11g0175700
vte2	TF_motif_seq_0266	1269	-	0.75	GGACT	TCP	Os03g0785800;Os04g0194600;Os12g0616400;Os01g0213800;Os08g0544800;Os11g0175700
vte2	TF_motif_seq_0266	1278	+	0.75	TGTCC	TCP	Os03g0785800;Os04g0194600;Os12g0616400;Os01g0213800;Os08g0544800;Os11g0175700
vte2	TF_motif_seq_0266	1278	-	0.75	TGTCC	TCP	Os03g0785800;Os04g0194600;Os12g0616400;Os01g0213800;Os08g0544800;Os11g0175700
vte2	TF_motif_seq_0266	1302	+	0.75	GGTCA	TCP	Os03g0785800;Os04g0194600;Os12g0616400;Os01g0213800;Os08g0544800;Os11g0175700
vte2	TF_motif_seq_0266	1302	-	0.75	GGTCA	TCP	Os03g0785800;Os04g0194600;Os12g0616400;Os01g0213800;Os08g0544800;Os11g0175700
vte2	TF_motif_seq_0266	1334	+	0.75	GGGCT	TCP	Os03g0785800;Os04g0194600;Os12g0616400;Os01g0213800;Os08g0544800;Os11g0175700
vte2	TF_motif_seq_0266	1334	-	0.75	GGGCT	TCP	Os03g0785800;Os04g0194600;Os12g0616400;Os01g0213800;Os08g0544800;Os11g0175700
vte2	TF_motif_seq_0282	428	+	1	AATAAa	Alpha-amylase	M24286;M24287
vte2	TF_motif_seq_0282	1432	+	1	AATAAa	Alpha-amylase	M24286;M24287
vte2	TF_motif_seq_0282	1452	+	1	AATAAa	Alpha-amylase	M24286;M24287
vte2	TF_motif_seq_0292	225	-	1	GTCGGt	AP2; ERF;ERF	Os08g0565200;Os01g0165000;Os02g0677300;Os03g0174400;Os05g0346200;Os06g0127100;Os01g0968800;Os04g0572400;Os05g0473300;Os06g0165600;Os08g0545500;Os09g0522000;Os09g0522100;Os09g0522200
vte2	TF_motif_seq_0316	558	+	0.833	GACGTt	(Others)	L345501
vte2	TF_motif_seq_0316	558	-	0.833	gACGTT	(Others)	L345501
vte2	TF_motif_seq_0316	1017	+	0.833	GAAGTc	(Others)	L345501
vte2	TF_motif_seq_0316	1017	-	0.833	gAAGTC	(Others)	L345501
vte2	TF_motif_seq_0316	1094	+	0.833	AACGTc	(Others)	L345501
vte2	TF_motif_seq_0316	1094	-	0.833	aACGTC	(Others)	L345501
vte2	TF_motif_seq_0316	1150	+	0.833	GAAGTc	(Others)	L345501
vte2	TF_motif_seq_0316	1150	-	0.833	gAAGTC	(Others)	L345501
vte2	TF_motif_seq_0327	523	+	0.833	TACTTa	(Others)	L34551
vte2	TF_motif_seq_0327	523	-	0.833	tACTTA	(Others)	L34551
vte2	TF_motif_seq_0327	1170	+	0.833	TAAGTa	(Others)	L34551
vte2	TF_motif_seq_0327	1170	-	0.833	tAAGTA	(Others)	L34551
vte2	TF_motif_seq_0347	1101	+	1	AATTAaa	Alpha-amylase	M24286;M24287
vte2	TF_motif_seq_0386	987	-	0.857	aaGGATA	Alpha-amylase	X16509
vte2	TF_motif_seq_0386	1415	+	1	TATCCat	Alpha-amylase	X16509
vte2	TF_motif_seq_0422	368	+	0.875	CATGCttg	LEA_5	U22102
vte2	TF_motif_seq_0422	890	+	0.875	CATGCttg	LEA_5	U22102
vte2	TF_motif_seq_0431	1084	+	0.75	GGTGCcgc	TCP	Os04g0194600;Os08g0544800
vte2	TF_motif_seq_0508	41	+	0.75	caCATACaa	SBP	Os01g0292900;Os01g0922600;Os02g0139400;Os02g0174100;Os02g0177300;Os03g0833300;Os04g0551500;Os05g0408200;Os06g0659100;Os06g0663500;Os06g0703500;Os08g0509600;Os08g0513700;Os08g0531600;Os09g0491532;Os09g0507100;Os11g0496600
vte2	TF_motif_seq_0508	103	-	0.75	taGTAAGca	SBP	Os01g0292900;Os01g0922600;Os02g0139400;Os02g0174100;Os02g0177300;Os03g0833300;Os04g0551500;Os05g0408200;Os06g0659100;Os06g0663500;Os06g0703500;Os08g0509600;Os08g0513700;Os08g0531600;Os09g0491532;Os09g0507100;Os11g0496600
vte2	TF_motif_seq_0508	226	+	0.875	tcGGTACaa	SBP	Os01g0292900;Os01g0922600;Os02g0139400;Os02g0174100;Os02g0177300;Os03g0833300;Os04g0551500;Os05g0408200;Os06g0659100;Os06g0663500;Os06g0703500;Os08g0509600;Os08g0513700;Os08g0531600;Os09g0491532;Os09g0507100;Os11g0496600
vte2	TF_motif_seq_0508	256	+	0.75	tgCGGACac	SBP	Os01g0292900;Os01g0922600;Os02g0139400;Os02g0174100;Os02g0177300;Os03g0833300;Os04g0551500;Os05g0408200;Os06g0659100;Os06g0663500;Os06g0703500;Os08g0509600;Os08g0513700;Os08g0531600;Os09g0491532;Os09g0507100;Os11g0496600
vte2	TF_motif_seq_0508	378	-	0.75	atGTATGca	SBP	Os01g0292900;Os01g0922600;Os02g0139400;Os02g0174100;Os02g0177300;Os03g0833300;Os04g0551500;Os05g0408200;Os06g0659100;Os06g0663500;Os06g0703500;Os08g0509600;Os08g0513700;Os08g0531600;Os09g0491532;Os09g0507100;Os11g0496600
vte2	TF_motif_seq_0508	461	+	0.75	caCTTACaa	SBP	Os01g0292900;Os01g0922600;Os02g0139400;Os02g0174100;Os02g0177300;Os03g0833300;Os04g0551500;Os05g0408200;Os06g0659100;Os06g0663500;Os06g0703500;Os08g0509600;Os08g0513700;Os08g0531600;Os09g0491532;Os09g0507100;Os11g0496600
vte2	TF_motif_seq_0508	901	+	0.75	ccCGTATaa	SBP	Os01g0292900;Os01g0922600;Os02g0139400;Os02g0174100;Os02g0177300;Os03g0833300;Os04g0551500;Os05g0408200;Os06g0659100;Os06g0663500;Os06g0703500;Os08g0509600;Os08g0513700;Os08g0531600;Os09g0491532;Os09g0507100;Os11g0496600
vte2	TF_motif_seq_0508	1087	+	0.75	gcCGCACaa	SBP	Os01g0292900;Os01g0922600;Os02g0139400;Os02g0174100;Os02g0177300;Os03g0833300;Os04g0551500;Os05g0408200;Os06g0659100;Os06g0663500;Os06g0703500;Os08g0509600;Os08g0513700;Os08g0531600;Os09g0491532;Os09g0507100;Os11g0496600
vte2	TF_motif_seq_0508	1170	+	0.75	taAGTACag	SBP	Os01g0292900;Os01g0922600;Os02g0139400;Os02g0174100;Os02g0177300;Os03g0833300;Os04g0551500;Os05g0408200;Os06g0659100;Os06g0663500;Os06g0703500;Os08g0509600;Os08g0513700;Os08g0531600;Os09g0491532;Os09g0507100;Os11g0496600
vte2	TF_motif_seq_0508	1190	-	0.75	ttGTCCGat	SBP	Os01g0292900;Os01g0922600;Os02g0139400;Os02g0174100;Os02g0177300;Os03g0833300;Os04g0551500;Os05g0408200;Os06g0659100;Os06g0663500;Os06g0703500;Os08g0509600;Os08g0513700;Os08g0531600;Os09g0491532;Os09g0507100;Os11g0496600
vte2	TFmatrixID_1746	171	+	0.891	tATGCAaagg	TBP	Os10g0432300;Os12g0580300
vte2	TFmatrixID_1746	381	+	0.915	tATGCAaaga	TBP	Os10g0432300;Os12g0580300
vte2	TF_motif_seq_0025	1325	-	0.8	gtttcTATAG	(Motif sequence only)
vte2	TF_motif_seq_0071	446	-	0.727	gagcccTGATC	(Motif sequence only)
vte2	TF_motif_seq_0092	1472	+	0.75	AACAAacacagt	(Motif sequence only)
vte2	TF_motif_seq_0121	366	+	0.846	TCCATgcttgcaa	(Motif sequence only)
vte2	TF_motif_seq_0259	224	-	0.8	TGTCG	(Motif sequence only)
vte2	TF_motif_seq_0259	288	-	0.8	CGTAG	(Motif sequence only)
vte2	TF_motif_seq_0259	557	+	0.8	TGACG	(Motif sequence only)
vte2	TF_motif_seq_0259	560	-	0.8	CGTTG	(Motif sequence only)
vte2	TF_motif_seq_0259	578	-	0.8	CGTCA	(Motif sequence only)
vte2	TF_motif_seq_0259	791	-	0.8	AGTCG	(Motif sequence only)
vte2	TF_motif_seq_0259	794	+	0.8	CGACA	(Motif sequence only)
vte2	TF_motif_seq_0259	943	+	0.8	CAACG	(Motif sequence only)
vte2	TF_motif_seq_0259	1093	+	0.8	CAACG	(Motif sequence only)
vte2	TF_motif_seq_0259	1096	-	0.8	CGTCA	(Motif sequence only)
vte2	TF_motif_seq_0259	1381	+	0.8	TGACG	(Motif sequence only)
vte2	TF_motif_seq_0274	5	-	0.8	TGAAA	(Motif sequence only)
vte2	TF_motif_seq_0274	67	+	1	TGTCA	(Motif sequence only)
vte2	TF_motif_seq_0274	67	-	0.8	TGTCA	(Motif sequence only)
vte2	TF_motif_seq_0274	72	-	0.8	AGACA	(Motif sequence only)
vte2	TF_motif_seq_0274	128	+	0.8	TTTCA	(Motif sequence only)
vte2	TF_motif_seq_0274	145	+	0.8	AGTCA	(Motif sequence only)
vte2	TF_motif_seq_0274	182	+	0.8	TGGCA	(Motif sequence only)
vte2	TF_motif_seq_0274	182	-	0.8	TGGCA	(Motif sequence only)
vte2	TF_motif_seq_0274	224	+	0.8	TGTCG	(Motif sequence only)
vte2	TF_motif_seq_0274	259	-	0.8	GGACA	(Motif sequence only)
vte2	TF_motif_seq_0274	266	+	0.8	TGTGA	(Motif sequence only)
vte2	TF_motif_seq_0274	305	-	0.8	TGAGA	(Motif sequence only)
vte2	TF_motif_seq_0274	315	+	0.8	TTTCA	(Motif sequence only)
vte2	TF_motif_seq_0274	338	-	0.8	TTACA	(Motif sequence only)
vte2	TF_motif_seq_0274	353	+	1	TGTCA	(Motif sequence only)
vte2	TF_motif_seq_0274	353	-	0.8	TGTCA	(Motif sequence only)
vte2	TF_motif_seq_0274	464	-	0.8	TTACA	(Motif sequence only)
vte2	TF_motif_seq_0274	479	-	0.8	GGACA	(Motif sequence only)
vte2	TF_motif_seq_0274	488	+	0.8	TGCCA	(Motif sequence only)
vte2	TF_motif_seq_0274	488	-	0.8	TGCCA	(Motif sequence only)
vte2	TF_motif_seq_0274	515	-	0.8	TGAGA	(Motif sequence only)
vte2	TF_motif_seq_0274	543	+	0.8	TCTCA	(Motif sequence only)
vte2	TF_motif_seq_0274	557	-	0.8	TGACG	(Motif sequence only)
vte2	TF_motif_seq_0274	565	+	1	TGTCA	(Motif sequence only)
vte2	TF_motif_seq_0274	565	-	0.8	TGTCA	(Motif sequence only)
vte2	TF_motif_seq_0274	572	-	0.8	TAACA	(Motif sequence only)
vte2	TF_motif_seq_0274	578	+	0.8	CGTCA	(Motif sequence only)
vte2	TF_motif_seq_0274	635	-	0.8	TGAGA	(Motif sequence only)
vte2	TF_motif_seq_0274	650	+	0.8	TGGCA	(Motif sequence only)
vte2	TF_motif_seq_0274	650	-	0.8	TGGCA	(Motif sequence only)
vte2	TF_motif_seq_0274	668	+	0.8	TGTAA	(Motif sequence only)
vte2	TF_motif_seq_0274	675	+	0.8	TATCA	(Motif sequence only)
vte2	TF_motif_seq_0274	677	-	0.8	TCACA	(Motif sequence only)
vte2	TF_motif_seq_0274	734	+	1	TGTCA	(Motif sequence only)
vte2	TF_motif_seq_0274	734	-	0.8	TGTCA	(Motif sequence only)
vte2	TF_motif_seq_0274	775	+	0.8	TGACA	(Motif sequence only)
vte2	TF_motif_seq_0274	775	-	1	TGACA	(Motif sequence only)
vte2	TF_motif_seq_0274	794	-	0.8	CGACA	(Motif sequence only)
vte2	TF_motif_seq_0274	841	+	0.8	TGTCT	(Motif sequence only)
vte2	TF_motif_seq_0274	845	-	0.8	TGAAA	(Motif sequence only)
vte2	TF_motif_seq_0274	850	+	0.8	TTTCA	(Motif sequence only)
vte2	TF_motif_seq_0274	860	-	0.8	TGACC	(Motif sequence only)
vte2	TF_motif_seq_0274	940	+	0.8	TGCCA	(Motif sequence only)
vte2	TF_motif_seq_0274	940	-	0.8	TGCCA	(Motif sequence only)
vte2	TF_motif_seq_0274	950	+	0.8	TATCA	(Motif sequence only)
vte2	TF_motif_seq_0274	960	+	1	TGTCA	(Motif sequence only)
vte2	TF_motif_seq_0274	960	-	0.8	TGTCA	(Motif sequence only)
vte2	TF_motif_seq_0274	1010	-	0.8	TGATA	(Motif sequence only)
vte2	TF_motif_seq_0274	1019	+	0.8	AGTCA	(Motif sequence only)
vte2	TF_motif_seq_0274	1037	+	0.8	TGTGA	(Motif sequence only)
vte2	TF_motif_seq_0274	1054	+	0.8	TGCCA	(Motif sequence only)
vte2	TF_motif_seq_0274	1054	-	0.8	TGCCA	(Motif sequence only)
vte2	TF_motif_seq_0274	1063	+	0.8	TGGCA	(Motif sequence only)
vte2	TF_motif_seq_0274	1063	-	0.8	TGGCA	(Motif sequence only)
vte2	TF_motif_seq_0274	1096	+	0.8	CGTCA	(Motif sequence only)
vte2	TF_motif_seq_0274	1118	+	0.8	TCTCA	(Motif sequence only)
vte2	TF_motif_seq_0274	1152	+	0.8	AGTCA	(Motif sequence only)
vte2	TF_motif_seq_0274	1154	-	0.8	TCACA	(Motif sequence only)
vte2	TF_motif_seq_0274	1191	+	0.8	TGTCC	(Motif sequence only)
vte2	TF_motif_seq_0274	1209	+	0.8	AGTCA	(Motif sequence only)
vte2	TF_motif_seq_0274	1255	+	0.8	TATCA	(Motif sequence only)
vte2	TF_motif_seq_0274	1278	+	0.8	TGTCC	(Motif sequence only)
vte2	TF_motif_seq_0274	1297	+	0.8	TTTCA	(Motif sequence only)
vte2	TF_motif_seq_0274	1302	+	0.8	GGTCA	(Motif sequence only)
vte2	TF_motif_seq_0274	1381	-	0.8	TGACG	(Motif sequence only)
vte2	TF_motif_seq_0274	1399	+	0.8	TGTTA	(Motif sequence only)
vte2	TF_motif_seq_0274	1422	-	0.8	TGATA	(Motif sequence only)
vte2	TF_motif_seq_0274	1428	-	0.8	TGATA	(Motif sequence only)
vte2	TF_motif_seq_0274	1468	+	0.8	TGTAA	(Motif sequence only)
vte2	TF_motif_seq_0274	1495	+	0.8	TTTCA	(Motif sequence only)
vte2	TF_motif_seq_0291	1247	+	1	AGCAGc	(Motif sequence only)
vte2	TF_motif_seq_0297	362	+	1	CAACTc	(Motif sequence only)
vte2	TF_motif_seq_0321	235	-	1	tTTTTC	(Motif sequence only)
vte2	TF_motif_seq_0321	236	-	1	tTTTCC	(Motif sequence only)
vte2	TF_motif_seq_0321	323	+	1	GGTAAa	(Motif sequence only)
vte2	TF_motif_seq_0321	518	+	1	GAAAAt	(Motif sequence only)
vte2	TF_motif_seq_0321	967	-	1	tTTATC	(Motif sequence only)
vte2	TF_motif_seq_0321	1111	-	1	aTTTTC	(Motif sequence only)
vte2	TF_motif_seq_0321	1112	-	1	tTTTCC	(Motif sequence only)
vte2	TF_motif_seq_0321	1253	-	1	aTTATC	(Motif sequence only)
vte2	TF_motif_seq_0321	1288	-	1	tTTTTC	(Motif sequence only)
vte2	TF_motif_seq_0321	1295	-	1	aTTTTC	(Motif sequence only)
vte2	TF_motif_seq_0321	1423	+	1	GATAAt	(Motif sequence only)
vte2	TF_motif_seq_0321	1429	+	1	GATAAt	(Motif sequence only)
vte2	TF_motif_seq_0324	225	-	1	GTCGGt	(Motif sequence only)
vte2	TF_motif_seq_0328	1415	+	1	TATCCa	(Motif sequence only)
vte2	TF_motif_seq_0334	440	+	1	TGGGCt	(Motif sequence only)
vte2	TF_motif_seq_0343	1197	-	0.857	atTGTTT	(Motif sequence only)
vte2	TF_motif_seq_0343	1284	-	0.857	tgTGTTT	(Motif sequence only)
vte2	TF_motif_seq_0343	1307	-	0.857	ctTGTTT	(Motif sequence only)
vte2	TF_motif_seq_0343	1471	+	1	AAACAaa	(Motif sequence only)
vte2	TF_motif_seq_0343	1475	+	0.857	AAACAca	(Motif sequence only)
vte2	TF_motif_seq_0344	1196	-	0.857	gaTTGTT	(Motif sequence only)
vte2	TF_motif_seq_0344	1472	+	1	AACAAac	(Motif sequence only)
vte2	TF_motif_seq_0353	945	+	0.84	ACGTGta	(Motif sequence only)
vte2	TF_motif_seq_0358	558	-	0.857	gaCGTTG	(Motif sequence only)
vte2	TF_motif_seq_0358	943	+	1	CAACGtg	(Motif sequence only)
vte2	TF_motif_seq_0358	1093	+	0.857	CAACGtc	(Motif sequence only)
vte2	TF_motif_seq_0360	943	-	0.857	caACGTG	(Motif sequence only)
vte2	TF_motif_seq_0363	496	+	0.857	CCAATga	(Motif sequence only)
vte2	TF_motif_seq_0363	1442	-	0.857	atATTGG	(Motif sequence only)
vte2	TF_motif_seq_0372	41	-	0.857	caCATAC	(Motif sequence only)
vte2	TF_motif_seq_0372	461	-	0.857	caCTTAC	(Motif sequence only)
vte2	TF_motif_seq_0380	670	+	0.857	TAACCta	(Motif sequence only)
vte2	TF_motif_seq_0387	691	-	0.84	gaGGATA	(Motif sequence only)
vte2	TF_motif_seq_0387	987	-	0.84	aaGGATA	(Motif sequence only)
vte2	TF_motif_seq_0387	1415	+	1	TATCCat	(Motif sequence only)
vte2	TF_motif_seq_0389	1493	+	0.857	TATTTca	(Motif sequence only)
vte2	TF_motif_seq_0390	1	-	0.857	atGATGA	(Motif sequence only)
vte2	TF_motif_seq_0390	636	-	0.857	gaGATGA	(Motif sequence only)
vte2	TF_motif_seq_0390	820	-	0.857	atGATGA	(Motif sequence only)
vte2	TF_motif_seq_0391	500	+	0.857	TGAGTct	(Motif sequence only)
vte2	TF_motif_seq_0392	173	+	1	TGCAAag	(Motif sequence only)
vte2	TF_motif_seq_0392	374	+	0.857	TGCAAtg	(Motif sequence only)
vte2	TF_motif_seq_0392	383	+	1	TGCAAag	(Motif sequence only)
vte2	TF_motif_seq_0392	804	+	1	TGCAAag	(Motif sequence only)
vte2	TF_motif_seq_0397	474	+	1	TTAATgg	(Motif sequence only)
vte2	TF_motif_seq_0397	715	+	0.857	TTAATga	(Motif sequence only)
vte2	TF_motif_seq_0397	1237	+	0.857	TTAATcg	(Motif sequence only)
vte2	TF_motif_seq_0425	75	+	0.75	CAAGGtga	(Motif sequence only)
vte2	TF_motif_seq_0425	189	-	0.75	gcaGCTGG	(Motif sequence only)
vte2	TF_motif_seq_0425	545	+	0.75	TCAGGtga	(Motif sequence only)
vte2	TF_motif_seq_0425	660	+	0.75	CCATGtgt	(Motif sequence only)
vte2	TF_motif_seq_0425	701	-	0.75	cagCCTGG	(Motif sequence only)
vte2	TF_motif_seq_0425	811	+	0.75	CCAAGcgg	(Motif sequence only)
vte2	TF_motif_seq_0425	1129	+	0.75	ACAGGtgt	(Motif sequence only)
vte2	TF_motif_seq_0425	1281	+	0.75	CCATGtgt	(Motif sequence only)
vte2	TF_motif_seq_0458	181	-	0.941	gtGGCAAt	(Motif sequence only)
vte2	TF_motif_seq_0458	1158	+	1	aTTCGCgg	(Motif sequence only)
vte2-1	TFmatrixID_0059	1477	+	0.993	gCGCCGcctc	AP2	Os06g0691100;Os08g0537900;Os09g0457900;Os11g0168500;Os01g0797600;Os01g0868000;LOC_Os02g06330;Os02g0189500;Os02g0520000;Os02g0546600;Os04g0399800;Os04g0610400;Os04g0669200;Os05g0437050;Os05g0497300
vte2-1	TFmatrixID_0060	1023	-	0.998	gCGCCGtc	AP2	Os06g0222400;Os07g0617000;Os07g0674800;Os08g0537900;Os09g0287000;Os09g0369000;Os09g0434500;Os09g0457900;Os10g0390800;LOC_Os10g30840;Os11g0168500;Os01g0313300;Os01g0797600;Os01g0868000;Os02g0521100;Os02g0546600;LOC_Os02g34270;Os02g0654700;Os02g0655200;Os02g0752800;Os02g0764700;Os03g0183000;Os03g0183200;Os03g0183300;Os03g0191900;Os03g0341000;Os03g0815800;Os04g0398000;Os04g0429050;Os04g0546800;Os04g…
vte2-1	TFmatrixID_0062	1478	+	0.992	CGCCGcctcg	AP2	Os06g0691100;Os07g0669500;Os08g0537900;Os09g0287000;Os10g0390800;Os11g0168500;Os01g0797600;Os01g0868000;LOC_Os02g06330;Os02g0189500;Os02g0520000;Os02g0546600;LOC_Os02g34270;Os02g0594300;Os03g0183200;Os04g0399800;Os04g0429050;Os04g0610400;Os04g0669200;Os05g0361700;Os05g0437050;Os05g0497300
vte2-1	TFmatrixID_0070	1165	+	0.99	cagCCGACg	AP2	Os06g0553700;Os10g0523900;Os10g0560700;Os02g0231000;Os02g0656600;Os02g0657000;Os04g0549700;Os04g0549800;Os04g0550200
vte2-1	TFmatrixID_0075	1477	+	0.99	gCGCCGcc	AP2	Os06g0691100;Os07g0617000;Os07g0669500;Os07g0674800;Os08g0537900;Os09g0287000;Os09g0457900;Os10g0390800;LOC_Os10g30840;Os10g0562900;Os11g0168500;Os01g0224100;Os01g0313300;Os01g0797600;Os01g0868000;LOC_Os02g06330;Os02g0189500;Os02g0520000;Os02g0521100;Os02g0546600;LOC_Os02g34270;Os02g0594300;Os02g0655200;Os02g0764700;Os03g0150200;Os03g0183200;Os03g0341000;Os04g0257500;Os04g0398000;Os04g0399800;Os0…
vte2-1	TFmatrixID_0078	1477	+	1	gcGCCGCc	AP2	Os07g0410300;LOC_Os08g44960;Os09g0457900;Os09g0571700;Os10g0390800;LOC_Os10g30840;Os10g0562900;Os01g0224100;Os01g0657400;Os01g0752500;Os01g0868000;Os02g0546600;Os02g0654700;Os02g0655200;Os03g0150200;Os03g0815800;Os03g0860100;Os04g0257500;Os04g0429050;Os04g0546800;Os04g0547500;Os04g0547600;Os04g0610400;Os05g0437050;Os05g0564700
vte2-1	TFmatrixID_0082	1023	+	0.998	gCGCCGtcc	AP2	Os06g0222400;Os07g0674800;Os08g0537900;Os09g0571700;LOC_Os10g30840;Os10g0562900;Os11g0168500;Os01g0313300;Os01g0752500;Os01g0868000;Os02g0521100;Os02g0546600;LOC_Os02g34270;Os02g0654700;Os02g0655200;Os02g0752800;Os03g0150200;Os03g0341000;Os03g0860100;Os04g0257500;Os04g0398000;Os04g0429050;Os04g0546800;Os04g0547500;Os04g0547600;Os05g0437050;Os05g0564700
vte2-1	TFmatrixID_0082	1477	+	0.998	gCGCCGcct	AP2	Os06g0222400;Os07g0674800;Os08g0537900;Os09g0571700;LOC_Os10g30840;Os10g0562900;Os11g0168500;Os01g0313300;Os01g0752500;Os01g0868000;Os02g0521100;Os02g0546600;LOC_Os02g34270;Os02g0654700;Os02g0655200;Os02g0752800;Os03g0150200;Os03g0341000;Os03g0860100;Os04g0257500;Os04g0398000;Os04g0429050;Os04g0546800;Os04g0547500;Os04g0547600;Os05g0437050;Os05g0564700
vte2-1	TFmatrixID_0083	1477	+	0.995	gcGCCGCc	AP2	Os09g0434500;Os11g0168500;Os01g0224100;Os01g0657400
vte2-1	TFmatrixID_0085	1166	+	0.978	agCCGACgcc	AP2; ERF	Os06g0553700;Os10g0560700;Os11g0242300;Os02g0231000;Os02g0558700;Os02g0656600;Os02g0657000;Os04g0430800;Os04g0549700;Os04g0549800;Os04g0550200;Os06g0127100
vte2-1	TFmatrixID_0086	1165	+	0.967	cagCCGACgc	AP2; ERF	Os06g0553700;Os10g0560700;Os11g0242300;Os02g0231000;Os02g0558700;Os02g0656600;Os02g0657000;Os04g0430800;Os04g0549700;Os04g0549800;Os04g0550200;Os06g0127100
vte2-1	TFmatrixID_0087	1477	+	1	gCGCCGcc	AP2	Os08g0408500;Os09g0369000;Os11g0168500;Os01g0224100;Os01g0657400;Os03g0183200;Os03g0191900;Os04g0429050
vte2-1	TFmatrixID_0100	1477	+	0.995	gCGCCGcctc	AP2	Os07g0617000;Os07g0674800;Os08g0537900;Os09g0434500;Os09g0457900;LOC_Os10g30840;Os10g0562900;Os11g0168500;Os01g0313300;Os01g0752500;Os01g0797600;Os01g0868000;Os02g0521100;Os02g0546600;LOC_Os02g34270;Os02g0654700;Os02g0655200;Os02g0764700;Os03g0150200;Os03g0183000;Os03g0183300;Os03g0341000;Os04g0257500;Os04g0398000;Os04g0429050;Os04g0546800;Os05g0437050;Os05g0564700
vte2-1	TFmatrixID_0102	1476	+	0.998	agcGCCGCct	AP2	Os06g0222400;Os07g0674800;Os08g0537900;LOC_Os10g30840;Os10g0562900;Os11g0168500;Os01g0752500;Os01g0868000;Os02g0521100;Os02g0546600;LOC_Os02g34270;Os02g0654700;Os02g0655200;Os02g0752800;Os03g0150200;Os03g0341000;Os03g0860100;Os04g0257500;Os04g0398000;Os04g0429050;Os04g0546800;Os04g0547500;Os04g0547600;Os05g0437050;Os05g0564700
vte2-1	TFmatrixID_0103	1022	+	0.996	ggCGCCGtcc	AP2	Os08g0537900;Os09g0571700;LOC_Os10g30840;Os10g0562900;Os11g0168500;Os01g0657400;Os01g0752500;Os01g0797600;Os01g0868000;Os02g0521100;Os02g0546600;Os02g0654700;Os02g0655200;Os03g0150200;Os03g0183000;Os03g0191900;Os03g0815800;Os03g0860100;Os04g0257500;Os04g0398000;Os04g0546800;Os04g0547500;Os04g0547600;Os05g0437050;Os05g0497300;Os05g0564700
vte2-1	TFmatrixID_0103	1476	+	0.997	agCGCCGcct	AP2	Os08g0537900;Os09g0571700;LOC_Os10g30840;Os10g0562900;Os11g0168500;Os01g0657400;Os01g0752500;Os01g0797600;Os01g0868000;Os02g0521100;Os02g0546600;Os02g0654700;Os02g0655200;Os03g0150200;Os03g0183000;Os03g0191900;Os03g0815800;Os03g0860100;Os04g0257500;Os04g0398000;Os04g0546800;Os04g0547500;Os04g0547600;Os05g0437050;Os05g0497300;Os05g0564700
vte2-1	TFmatrixID_0107	1477	+	0.999	gCGCCGcct	AP2	Os08g0408500;Os09g0369000;Os10g0390800;Os11g0168500;Os01g0224100;Os01g0657400;Os01g0868000;Os03g0191900;Os03g0815800;Os05g0437050;Os06g0160500
vte2-1	TFmatrixID_0109	1165	+	0.901	cagCCGACgc	AP2; ERF	Os02g0677300;Os06g0127100
vte2-1	TFmatrixID_0127	1234	+	0.954	cCAACAta	AP2; B3; RAV	Os01g0693400
vte2-1	TFmatrixID_0130	258	-	0.969	agatTATATg	AT-Hook	Os06g0326000;Os07g0184800;Os08g0512400;Os09g0491708
vte2-1	TFmatrixID_0131	18	-	0.999	TTTATttct	AT-Hook	Os06g0326000;Os07g0184800;Os08g0512400;Os09g0491708
vte2-1	TFmatrixID_0131	139	-	0.999	TTTATttga	AT-Hook	Os06g0326000;Os07g0184800;Os08g0512400;Os09g0491708
vte2-1	TFmatrixID_0131	1316	+	0.999	cagtATAAA	AT-Hook	Os06g0326000;Os07g0184800;Os08g0512400;Os09g0491708
vte2-1	TFmatrixID_0131	1382	+	0.999	aataATAAA	AT-Hook	Os06g0326000;Os07g0184800;Os08g0512400;Os09g0491708
vte2-1	TFmatrixID_0131	1395	+	0.999	caaaATAAA	AT-Hook	Os06g0326000;Os07g0184800;Os08g0512400;Os09g0491708
vte2-1	TFmatrixID_0133	324	-	0.999	TTTTTtcct	AT-Hook	Os01g0835600
vte2-1	TFmatrixID_0133	325	-	0.999	TTTTTccta	AT-Hook	Os01g0835600
vte2-1	TFmatrixID_0133	458	-	0.999	TTTTTaggg	AT-Hook	Os01g0835600
vte2-1	TFmatrixID_0133	652	-	0.999	TTTTTtcta	AT-Hook	Os01g0835600
vte2-1	TFmatrixID_0136	1383	+	0.995	ataATAAA	AT-Hook	Os07g0184800
vte2-1	TFmatrixID_0136	1396	+	1	aaaATAAA	AT-Hook	Os07g0184800
vte2-1	TFmatrixID_0137	242	+	1	aaaAATAT	AT-Hook	Os07g0184800
vte2-1	TFmatrixID_0141	618	+	0.969	cGCAATtccc	AT-Hook	Os07g0184800
vte2-1	TFmatrixID_0146	260	-	0.995	ATTATatgt	AT-Hook	Os07g0184800
vte2-1	TFmatrixID_0146	634	+	0.997	agaaATAAT	AT-Hook	Os07g0184800
vte2-1	TFmatrixID_0146	1379	+	0.998	acaaATAAT	AT-Hook	Os07g0184800
vte2-1	TFmatrixID_0148	344	-	0.99	cATTTTtt	AT-Hook	Os02g0824300;Os06g0326000;Os07g0184800;Os08g0512400;Os09g0491708
vte2-1	TFmatrixID_0148	356	+	1	aaAAAATt	AT-Hook	Os02g0824300;Os06g0326000;Os07g0184800;Os08g0512400;Os09g0491708
vte2-1	TFmatrixID_0148	384	+	0.993	aaAAAATc	AT-Hook	Os02g0824300;Os06g0326000;Os07g0184800;Os08g0512400;Os09g0491708
vte2-1	TFmatrixID_0148	401	-	0.998	tATTTTtt	AT-Hook	Os02g0824300;Os06g0326000;Os07g0184800;Os08g0512400;Os09g0491708
vte2-1	TFmatrixID_0148	411	+	0.998	aaAAAATa	AT-Hook	Os02g0824300;Os06g0326000;Os07g0184800;Os08g0512400;Os09g0491708
vte2-1	TFmatrixID_0148	1066	+	0.998	aaAAAATa	AT-Hook	Os02g0824300;Os06g0326000;Os07g0184800;Os08g0512400;Os09g0491708
vte2-1	TFmatrixID_0148	1320	+	0.993	atAAAATa	AT-Hook	Os02g0824300;Os06g0326000;Os07g0184800;Os08g0512400;Os09g0491708
vte2-1	TFmatrixID_0149	242	-	0.994	aaAAATAttt	AT-Hook	Os11g0602200
vte2-1	TFmatrixID_0149	244	+	0.994	aaaTATTTta	AT-Hook	Os11g0602200
vte2-1	TFmatrixID_0149	1321	-	0.967	taAAATAttc	AT-Hook	Os11g0602200
vte2-1	TFmatrixID_0149	1340	-	0.965	agAAATAttc	AT-Hook	Os11g0602200
vte2-1	TFmatrixID_0150	243	+	0.997	aaAATATttt	AT-Hook	Os01g0835600
vte2-1	TFmatrixID_0150	243	-	0.997	aaaATATTtt	AT-Hook	Os01g0835600
vte2-1	TFmatrixID_0150	1322	+	0.997	aaAATATtcc	AT-Hook	Os01g0835600
vte2-1	TFmatrixID_0150	1322	-	0.997	aaaATATTcc	AT-Hook	Os01g0835600
vte2-1	TFmatrixID_0150	1341	+	0.998	gaAATATtca	AT-Hook	Os01g0835600
vte2-1	TFmatrixID_0150	1341	-	0.998	gaaATATTca	AT-Hook	Os01g0835600
vte2-1	TFmatrixID_0152	135	-	1	AATTTtt	AT-Hook	Os06g0326000
vte2-1	TFmatrixID_0152	357	+	1	aaAAATT	AT-Hook	Os06g0326000
vte2-1	TFmatrixID_0153	136	-	1	ATTTTtat	AT-Hook	Os07g0184800
vte2-1	TFmatrixID_0153	240	+	1	ataAAAAT	AT-Hook	Os07g0184800
vte2-1	TFmatrixID_0154	243	+	0.926	aAAATAtt	AT-Hook	Os07g0184800
vte2-1	TFmatrixID_0154	245	-	0.926	aaTATTTt	AT-Hook	Os07g0184800
vte2-1	TFmatrixID_0154	1322	+	0.926	aAAATAtt	AT-Hook	Os07g0184800
vte2-1	TFmatrixID_0156	980	-	0.96	ttTGTCGca	B3; ARF	Os02g0141100;Os02g0164900;Os04g0664400;Os04g0671900;Os06g0196700;Os06g0677800;Os06g0702600;Os08g0520500;Os11g0523800;Os12g0613700
vte2-1	TFmatrixID_0174	1077	-	0.75	gtaGGTGC	bHLH	Os01g0915600;Os02g0564700;Os02g0705500;Os03g0231950;Os03g0728900;Os03g0802900;Os04g0350700;Os05g0103000;Os06g0193400;Os06g0275600;Os07g0193800;Os08g0487700;Os08g0524800;Os08g0536800;Os09g0417400;Os09g0474100;Os09g0501600;Os09g0510500
vte2-1	TFmatrixID_0174	1129	+	0.75	GCATGagc	bHLH	Os01g0915600;Os02g0564700;Os02g0705500;Os03g0231950;Os03g0728900;Os03g0802900;Os04g0350700;Os05g0103000;Os06g0193400;Os06g0275600;Os07g0193800;Os08g0487700;Os08g0524800;Os08g0536800;Os09g0417400;Os09g0474100;Os09g0501600;Os09g0510500
vte2-1	TFmatrixID_0174	1158	+	0.75	GCGCGagc	bHLH	Os01g0915600;Os02g0564700;Os02g0705500;Os03g0231950;Os03g0728900;Os03g0802900;Os04g0350700;Os05g0103000;Os06g0193400;Os06g0275600;Os07g0193800;Os08g0487700;Os08g0524800;Os08g0536800;Os09g0417400;Os09g0474100;Os09g0501600;Os09g0510500
vte2-1	TFmatrixID_0174	1158	-	0.75	gcgCGAGC	bHLH	Os01g0915600;Os02g0564700;Os02g0705500;Os03g0231950;Os03g0728900;Os03g0802900;Os04g0350700;Os05g0103000;Os06g0193400;Os06g0275600;Os07g0193800;Os08g0487700;Os08g0524800;Os08g0536800;Os09g0417400;Os09g0474100;Os09g0501600;Os09g0510500
vte2-1	TFmatrixID_0211	1144	+	1	gACACTc	C2H2	Os03g0437200;Os12g0583700
vte2-1	TFmatrixID_0211	1458	-	0.999	cAGTGTt	C2H2	Os03g0437200;Os12g0583700
vte2-1	TFmatrixID_0213	1144	+	1	gACACTc	C2H2	Os03g0437100;Os03g0437200;Os12g0583700
vte2-1	TFmatrixID_0213	1458	-	0.999	cAGTGTt	C2H2	Os03g0437100;Os03g0437200;Os12g0583700
vte2-1	TFmatrixID_0214	1141	+	0.978	aatgACACTcttg	C2H2	Os01g0838600;Os01g0839100;Os03g0279700;Os03g0820300;Os05g0114400;Os05g0460900
vte2-1	TFmatrixID_0224	270	+	0.988	tTTTAAat	TCR	Os01g0761100
vte2-1	TFmatrixID_0224	270	-	0.991	ttTTAAAt	TCR	Os01g0761100
vte2-1	TFmatrixID_0227	76	-	0.96	cgtTCAAAct	TCR	Os01g0761100
vte2-1	TFmatrixID_0255	1291	-	0.98	acgATACAg	EIN3	Os03g0324200;Os03g0324300;Os07g0685700;Os08g0508700
vte2-1	TFmatrixID_0255	1310	-	0.986	aagATACAg	EIN3	Os03g0324200;Os03g0324300;Os07g0685700;Os08g0508700
vte2-1	TFmatrixID_0256	869	+	0.993	tgATGCAtgg	EIN3	Os03g0324200;Os03g0324300;Os07g0685700;Os08g0508700
vte2-1	TFmatrixID_0256	869	-	0.993	tgaTGCATgg	EIN3	Os03g0324200;Os03g0324300;Os07g0685700;Os08g0508700
vte2-1	TFmatrixID_0257	1081	+	0.921	gtgcTACATcc	EIN3	Os03g0324200;Os03g0324300;Os07g0685700;Os08g0508700;Os09g0490200
vte2-1	TFmatrixID_0262	689	+	0.999	tcTGATCac	GATA	Os01g0976800;Os02g0220400;Os03g0831200;Os05g0155400;Os05g0578900;Os06g0571800
vte2-1	TFmatrixID_0262	690	-	1	ctGATCAct	GATA	Os01g0976800;Os02g0220400;Os03g0831200;Os05g0155400;Os05g0578900;Os06g0571800
vte2-1	TFmatrixID_0262	722	+	1	aaTGATCac	GATA	Os01g0976800;Os02g0220400;Os03g0831200;Os05g0155400;Os05g0578900;Os06g0571800
vte2-1	TFmatrixID_0262	723	-	0.999	atGATCAct	GATA	Os01g0976800;Os02g0220400;Os03g0831200;Os05g0155400;Os05g0578900;Os06g0571800
vte2-1	TFmatrixID_0263	509	+	1	AGATCaa	Dof;GATA	Os03g0684000;Os02g0148500;Os03g0734900
vte2-1	TFmatrixID_0265	508	+	0.956	aAGATCaata	GATA	Os01g0745700;Os02g0645600;Os02g0806300;Os03g0145200;Os05g0520300;Os10g0557600
vte2-1	TFmatrixID_0280	1136	+	0.986	caaTTAATga	Homeodomain; HD-ZIP	Os02g0674800;Os04g0569100;Os04g0627000;Os06g0207966;Os08g0136100;Os08g0187500;Os09g0526200;Os10g0575600
vte2-1	TFmatrixID_0288	427	-	0.95	ttaATTAAtta	Homeodomain; HD-ZIP	Os02g0674800;Os04g0569100;Os04g0627000;Os06g0207966;Os08g0136100;Os08g0187500;Os09g0526200;Os10g0575600
vte2-1	TFmatrixID_0288	428	+	0.95	taaTTAATtat	Homeodomain; HD-ZIP	Os02g0674800;Os04g0569100;Os04g0627000;Os06g0207966;Os08g0136100;Os08g0187500;Os09g0526200;Os10g0575600
vte2-1	TFmatrixID_0288	1135	-	0.993	gcaATTAAtga	Homeodomain; HD-ZIP	Os02g0674800;Os04g0569100;Os04g0627000;Os06g0207966;Os08g0136100;Os08g0187500;Os09g0526200;Os10g0575600
vte2-1	TFmatrixID_0290	1137	+	0.982	aaTTAATgac	Homeodomain; HD-ZIP	Os02g0674800;Os04g0569100;Os04g0627000;Os06g0207966;Os08g0136100;Os08g0187500;Os09g0526200;Os10g0575600
vte2-1	TFmatrixID_0296	207	-	0.998	gtgGATTAac	Homeodomain; ZF-HD	Os02g0706600
vte2-1	TFmatrixID_0296	394	+	0.998	atTAATCtat	Homeodomain; ZF-HD	Os02g0706600
vte2-1	TFmatrixID_0296	518	-	0.997	gaaGATTAaa	Homeodomain; ZF-HD	Os02g0706600
vte2-1	TFmatrixID_0296	637	+	0.997	aaTAATCcct	Homeodomain; ZF-HD	Os02g0706600
vte2-1	TFmatrixID_0296	1174	-	0.998	ccaGATTAgg	Homeodomain; ZF-HD	Os02g0706600
vte2-1	TFmatrixID_0320	144	+	0.863	ttGATATtt	Myb/SANT	Os02g0680700;Os06g0105800;Os06g0669700
vte2-1	TFmatrixID_0323	144	-	0.992	ttGATATttc	Myb/SANT	Os06g0728700
vte2-1	TFmatrixID_0334	145	-	0.984	tGATATttc	Myb/SANT	Os06g0728700
vte2-1	TFmatrixID_0336	1241	-	0.909	agcACCTAtcg	Myb/SANT	Os05g0429900;LOC_Os08g43550;Os09g0538400;Os11g0180900;Os12g0175400
vte2-1	TFmatrixID_0348	1309	-	0.958	aAAGATacag	Myb/SANT	Os03g0224200
vte2-1	TFmatrixID_0352	1076	+	0.961	agTAGGTg	Myb/SANT	Os01g0874300;Os05g0429900;LOC_Os08g43550;Os09g0538400;Os11g0180900;Os12g0175400
vte2-1	TFmatrixID_0357	243	+	0.972	aaAATATttt	Myb/SANT; G2-like	Os02g0696900;Os03g0766500;Os08g0160300;Os08g0426866;Os09g0395300
vte2-1	TFmatrixID_0357	243	-	0.972	aaaATATTtt	Myb/SANT; G2-like	Os02g0696900;Os03g0766500;Os08g0160300;Os08g0426866;Os09g0395300
vte2-1	TFmatrixID_0357	1322	+	0.977	aaAATATtcc	Myb/SANT; G2-like	Os02g0696900;Os03g0766500;Os08g0160300;Os08g0426866;Os09g0395300
vte2-1	TFmatrixID_0357	1322	-	0.977	aaaATATTcc	Myb/SANT; G2-like	Os02g0696900;Os03g0766500;Os08g0160300;Os08g0426866;Os09g0395300
vte2-1	TFmatrixID_0357	1341	+	0.961	gaAATATtca	Myb/SANT; G2-like	Os02g0696900;Os03g0766500;Os08g0160300;Os08g0426866;Os09g0395300
vte2-1	TFmatrixID_0357	1341	-	0.961	gaaATATTca	Myb/SANT; G2-like	Os02g0696900;Os03g0766500;Os08g0160300;Os08g0426866;Os09g0395300
vte2-1	TFmatrixID_0369	144	-	0.978	ttGATATtt	Myb/SANT	Os08g0157600
vte2-1	TFmatrixID_0372	1486	+	0.992	cgcTATCCg	Myb/SANT	Os01g0187900;Os01g0192300;Os05g0195700;Os08g0151000;Os10g0561400
vte2-1	TFmatrixID_0384	558	-	0.782	caaAGTAAt	NAC; NAM	Os06g0101800;Os08g0157900
vte2-1	TFmatrixID_0392	613	-	0.999	ctctACGCAa	NAC; NAM	13113.t00085;Os02g0252200;Os02g0643600;LOC_Os03g03540;Os06g0104200;Os06g0131700;Os06g0530400;Os08g0103900;Os08g0115800;Os10g0532000
vte2-1	TFmatrixID_0394	615	-	0.937	ctaCGCAAttc	NAC; NAM	Os01g0104500;Os01g0393100;Os03g0327100;Os03g0624600;Os04g0460600;Os06g0344900;Os07g0684800;Os08g0511200;Os09g0497900
vte2-1	TFmatrixID_0396	614	-	0.952	tctACGCAat	NAC; NAM	Os01g0104500;Os01g0393100;Os02g0579000;Os03g0327100;Os03g0624600;Os04g0460600;Os06g0344900;Os07g0684800;Os08g0511200;Os09g0497900
vte2-1	TFmatrixID_0397	614	-	0.991	tcTACGCaat	NAC; NAM	13113.t00085;Os02g0252200;Os02g0643600;LOC_Os03g03540;Os06g0104200;Os06g0530400;Os08g0103900;Os08g0115800;Os10g0532000
vte2-1	TFmatrixID_0397	658	+	0.98	ctaGCGTAta	NAC; NAM	13113.t00085;Os02g0252200;Os02g0643600;LOC_Os03g03540;Os06g0104200;Os06g0530400;Os08g0103900;Os08g0115800;Os10g0532000
vte2-1	TFmatrixID_0470	544	+	0.901	tttgCCAAAtcagccaaa	MADS box; MIKC; M-type	Os01g0201700;Os01g0883100;Os01g0886200;Os02g0104100;Os02g0579600;Os02g0682200;Os02g0731200;Os03g0122600;Os03g0752800;Os03g0753100;Os04g0304400;Os04g0580700;LOC_Os05g11380;Os05g0203800;Os06g0108500;Os06g0162800;Os06g0223300;Os06g0347700;Os07g0108900;Os08g0494100;Os08g0531700;Os08g0531900;Os09g0507200;Os10g0536100;Os12g0207000
vte2-1	TFmatrixID_0487	884	-	0.982	ggtggCACCG	AP2; ERF	Os06g0222400;Os08g0537900;Os08g0565200;Os09g0369000;Os09g0457900;Os10g0371100;Os11g0168500;Os01g0868000;Os02g0546600;Os02g0638650;Os02g0656600;Os02g0657000;Os02g0752800;Os02g0764700;Os03g0174400;Os03g0191900;Os04g0529100;Os04g0549700;Os04g0549800;Os04g0550200;Os05g0346200;Os05g0351200;Os05g0437050
vte2-1	TFmatrixID_0518	716	+	0.784	ttccaaaATGATcactagc	bZIP; Homeodomain; HD-ZIP	Os03g0109400;Os03g0640800;Os10g0480200;Os12g0612700
vte2-1	TFmatrixID_0518	1116	+	0.797	aaaggtgATGATggcatga	bZIP; Homeodomain; HD-ZIP	Os03g0109400;Os03g0640800;Os10g0480200;Os12g0612700
vte2-1	TFmatrixID_0536	544	+	0.901	tttgCCAAAtcagccaaa	MADS box; MIKC; M-type	Os01g0201700;Os01g0883100;Os01g0886200;Os02g0104100;Os02g0579600;Os02g0682200;Os02g0731200;Os03g0122600;Os03g0752800;Os03g0753100;Os04g0304400;Os04g0580700;LOC_Os05g11380;Os05g0203800;Os06g0108500;Os06g0162800;Os06g0223300;Os06g0347700;Os07g0108900;Os08g0494100;Os08g0531700;Os08g0531900;Os09g0507200;Os10g0536100;Os12g0207000
vte2-1	TFmatrixID_0542	716	+	0.784	ttccaaaATGATcactagc	bZIP; Homeodomain; HD-ZIP	Os03g0109400;Os03g0640800;Os10g0480200;Os12g0612700
vte2-1	TFmatrixID_0542	1116	+	0.797	aaaggtgATGATggcatga	bZIP; Homeodomain; HD-ZIP	Os03g0109400;Os03g0640800;Os10g0480200;Os12g0612700
vte2-1	TFmatrixID_0551	906	+	0.946	ttcGGTTG	Myb/SANT; MYB	Os01g0812000
vte2-1	TFmatrixID_0563	209	+	0.908	ggaTTAACatac	Myb/SANT	Os04g0348300
vte2-1	TFmatrixID_0569	238	+	0.984	ctATAAAaatatttt	TBP	Os10g0432300;Os12g0580300
vte2-1	TFmatrixID_0569	1318	+	0.974	gtATAAAatattccg	TBP	Os10g0432300;Os12g0580300
vte2-1	TFmatrixID_0570	237	+	0.997	gctaTAAAAa	TBP	Os10g0432300;Os12g0580300
vte2-1	TFmatrixID_0570	1060	+	0.953	tcttTAAAAa	TBP	Os10g0432300;Os12g0580300
vte2-1	TFmatrixID_0570	1317	+	0.945	agtaTAAAAt	TBP	Os10g0432300;Os12g0580300
vte2-1	TFmatrixID_0579	207	+	0.884	gtggatTAACAtacg	Myb/SANT	Os04g0348300
vte2-1	TFmatrixID_0580	243	+	0.999	aAAATAt	AT-Hook	Os01g0835600
vte2-1	TFmatrixID_0580	246	-	0.999	aTATTTt	AT-Hook	Os01g0835600
vte2-1	TFmatrixID_0580	1322	+	0.999	aAAATAt	AT-Hook	Os01g0835600
vte2-1	TFmatrixID_0585	237	+	0.969	gctATAAAaat	TBP	Os10g0432300;Os12g0580300
vte2-1	TFmatrixID_0585	1317	+	0.985	agtATAAAata	TBP	Os10g0432300;Os12g0580300
vte2-1	TF_motif_seq_0175	133	-	0.611	tgaatttttatttGATAT	(Others)	X52153
vte2-1	TF_motif_seq_0246	304	-	1	AGTCA	Homeodomain; TALE	Os03g0727000
vte2-1	TF_motif_seq_0246	864	+	1	TGACT	Homeodomain; TALE	Os03g0727000
vte2-1	TF_motif_seq_0246	964	-	1	TGTCA	Homeodomain; TALE	Os03g0727000
vte2-1	TF_motif_seq_0246	1143	+	1	TGACA	Homeodomain; TALE	Os03g0727000
vte2-1	TF_motif_seq_0256	35	-	0.8	GTATG	B3	Os04g0676600;Os08g0101000
vte2-1	TF_motif_seq_0256	65	+	0.8	CTTGC	B3	Os04g0676600;Os08g0101000
vte2-1	TF_motif_seq_0256	216	+	0.8	CATAC	B3	Os04g0676600;Os08g0101000
vte2-1	TF_motif_seq_0256	231	-	0.8	GCATT	B3	Os04g0676600;Os08g0101000
vte2-1	TF_motif_seq_0256	436	+	0.8	TATGC	B3	Os04g0676600;Os08g0101000
vte2-1	TF_motif_seq_0256	506	-	0.8	GCAAG	B3	Os04g0676600;Os08g0101000
vte2-1	TF_motif_seq_0256	569	+	0.8	CATAC	B3	Os04g0676600;Os08g0101000
vte2-1	TF_motif_seq_0256	594	-	1	GCATG	B3	Os04g0676600;Os08g0101000
vte2-1	TF_motif_seq_0256	595	+	0.8	CATGG	B3	Os04g0676600;Os08g0101000
vte2-1	TF_motif_seq_0256	606	-	0.8	GTATG	B3	Os04g0676600;Os08g0101000
vte2-1	TF_motif_seq_0256	680	+	0.8	CATCC	B3	Os04g0676600;Os08g0101000
vte2-1	TF_motif_seq_0256	714	+	0.8	CATTC	B3	Os04g0676600;Os08g0101000
vte2-1	TF_motif_seq_0256	746	+	0.8	CATTC	B3	Os04g0676600;Os08g0101000
vte2-1	TF_motif_seq_0256	870	+	0.8	GATGC	B3	Os04g0676600;Os08g0101000
vte2-1	TF_motif_seq_0256	873	-	1	GCATG	B3	Os04g0676600;Os08g0101000
vte2-1	TF_motif_seq_0256	874	+	0.8	CATGG	B3	Os04g0676600;Os08g0101000
vte2-1	TF_motif_seq_0256	880	-	1	GCATG	B3	Os04g0676600;Os08g0101000
vte2-1	TF_motif_seq_0256	881	+	0.8	CATGG	B3	Os04g0676600;Os08g0101000
vte2-1	TF_motif_seq_0256	961	-	0.8	CCATG	B3	Os04g0676600;Os08g0101000
vte2-1	TF_motif_seq_0256	962	+	0.8	CATGT	B3	Os04g0676600;Os08g0101000
vte2-1	TF_motif_seq_0256	973	-	0.8	TCATG	B3	Os04g0676600;Os08g0101000
vte2-1	TF_motif_seq_0256	974	+	1	CATGC	B3	Os04g0676600;Os08g0101000
vte2-1	TF_motif_seq_0256	986	-	0.8	GCATC	B3	Os04g0676600;Os08g0101000
vte2-1	TF_motif_seq_0256	1037	-	0.8	CCATG	B3	Os04g0676600;Os08g0101000
vte2-1	TF_motif_seq_0256	1038	+	0.8	CATGG	B3	Os04g0676600;Os08g0101000
vte2-1	TF_motif_seq_0256	1045	-	0.8	GCAAG	B3	Os04g0676600;Os08g0101000
vte2-1	TF_motif_seq_0256	1046	+	0.8	CAAGC	B3	Os04g0676600;Os08g0101000
vte2-1	TF_motif_seq_0256	1049	-	0.8	GCATT	B3	Os04g0676600;Os08g0101000
vte2-1	TF_motif_seq_0256	1050	+	0.8	CATTC	B3	Os04g0676600;Os08g0101000
vte2-1	TF_motif_seq_0256	1055	-	1	GCATG	B3	Os04g0676600;Os08g0101000
vte2-1	TF_motif_seq_0256	1056	+	0.8	CATGT	B3	Os04g0676600;Os08g0101000
vte2-1	TF_motif_seq_0256	1087	+	0.8	CATCC	B3	Os04g0676600;Os08g0101000
vte2-1	TF_motif_seq_0256	1100	+	0.8	CATCC	B3	Os04g0676600;Os08g0101000
vte2-1	TF_motif_seq_0256	1129	-	1	GCATG	B3	Os04g0676600;Os08g0101000
vte2-1	TF_motif_seq_0256	1130	+	0.8	CATGA	B3	Os04g0676600;Os08g0101000
vte2-1	TF_motif_seq_0256	1185	-	0.8	GCACG	B3	Os04g0676600;Os08g0101000
vte2-1	TF_motif_seq_0256	1186	+	0.8	CACGC	B3	Os04g0676600;Os08g0101000
vte2-1	TF_motif_seq_0256	1262	+	0.8	TATGC	B3	Os04g0676600;Os08g0101000
vte2-1	TF_motif_seq_0256	1403	+	0.8	AATGC	B3	Os04g0676600;Os08g0101000
vte2-1	TF_motif_seq_0257	2	+	0.8	CCAAA	NF-YB	Os01g0834400;Os02g0725900;Os05g0463800;Os05g0573500
vte2-1	TF_motif_seq_0257	3	+	0.8	CAAAT	NF-YB	Os01g0834400;Os02g0725900;Os05g0463800;Os05g0573500
vte2-1	TF_motif_seq_0257	51	+	0.8	CCAAA	NF-YB	Os01g0834400;Os02g0725900;Os05g0463800;Os05g0573500
vte2-1	TF_motif_seq_0257	52	+	0.8	CAAAT	NF-YB	Os01g0834400;Os02g0725900;Os05g0463800;Os05g0573500
vte2-1	TF_motif_seq_0257	86	+	0.8	CCAAA	NF-YB	Os01g0834400;Os02g0725900;Os05g0463800;Os05g0573500
vte2-1	TF_motif_seq_0257	142	-	0.8	ATTTG	NF-YB	Os01g0834400;Os02g0725900;Os05g0463800;Os05g0573500
vte2-1	TF_motif_seq_0257	160	+	0.8	CCACT	NF-YB	Os01g0834400;Os02g0725900;Os05g0463800;Os05g0573500
vte2-1	TF_motif_seq_0257	203	-	0.8	AGTGG	NF-YB	Os01g0834400;Os02g0725900;Os05g0463800;Os05g0573500
vte2-1	TF_motif_seq_0257	223	+	0.8	CTAAT	NF-YB	Os01g0834400;Os02g0725900;Os05g0463800;Os05g0573500
vte2-1	TF_motif_seq_0257	233	-	0.8	ATTAG	NF-YB	Os01g0834400;Os02g0725900;Os05g0463800;Os05g0573500
vte2-1	TF_motif_seq_0257	310	-	0.8	ATTGC	NF-YB	Os01g0834400;Os02g0725900;Os05g0463800;Os05g0573500
vte2-1	TF_motif_seq_0257	364	+	0.8	CCTAT	NF-YB	Os01g0834400;Os02g0725900;Os05g0463800;Os05g0573500
vte2-1	TF_motif_seq_0257	367	-	0.8	ATAGG	NF-YB	Os01g0834400;Os02g0725900;Os05g0463800;Os05g0573500
vte2-1	TF_motif_seq_0257	420	+	0.8	CTAAT	NF-YB	Os01g0834400;Os02g0725900;Os05g0463800;Os05g0573500
vte2-1	TF_motif_seq_0257	512	+	0.8	TCAAT	NF-YB	Os01g0834400;Os02g0725900;Os05g0463800;Os05g0573500
vte2-1	TF_motif_seq_0257	537	+	0.8	CCAAA	NF-YB	Os01g0834400;Os02g0725900;Os05g0463800;Os05g0573500
vte2-1	TF_motif_seq_0257	548	+	0.8	CCAAA	NF-YB	Os01g0834400;Os02g0725900;Os05g0463800;Os05g0573500
vte2-1	TF_motif_seq_0257	549	+	0.8	CAAAT	NF-YB	Os01g0834400;Os02g0725900;Os05g0463800;Os05g0573500
vte2-1	TF_motif_seq_0257	557	+	0.8	CCAAA	NF-YB	Os01g0834400;Os02g0725900;Os05g0463800;Os05g0573500
vte2-1	TF_motif_seq_0257	619	+	0.8	GCAAT	NF-YB	Os01g0834400;Os02g0725900;Os05g0463800;Os05g0573500
vte2-1	TF_motif_seq_0257	626	+	0.8	CCAAG	NF-YB	Os01g0834400;Os02g0725900;Os05g0463800;Os05g0573500
vte2-1	TF_motif_seq_0257	713	+	0.8	CCATT	NF-YB	Os01g0834400;Os02g0725900;Os05g0463800;Os05g0573500
vte2-1	TF_motif_seq_0257	718	+	0.8	CCAAA	NF-YB	Os01g0834400;Os02g0725900;Os05g0463800;Os05g0573500
vte2-1	TF_motif_seq_0257	744	+	0.8	CCCAT	NF-YB	Os01g0834400;Os02g0725900;Os05g0463800;Os05g0573500
vte2-1	TF_motif_seq_0257	745	+	0.8	CCATT	NF-YB	Os01g0834400;Os02g0725900;Os05g0463800;Os05g0573500
vte2-1	TF_motif_seq_0257	750	+	0.8	CCAAA	NF-YB	Os01g0834400;Os02g0725900;Os05g0463800;Os05g0573500
vte2-1	TF_motif_seq_0257	770	-	0.8	ATTGA	NF-YB	Os01g0834400;Os02g0725900;Os05g0463800;Os05g0573500
vte2-1	TF_motif_seq_0257	784	-	0.8	AGTGG	NF-YB	Os01g0834400;Os02g0725900;Os05g0463800;Os05g0573500
vte2-1	TF_motif_seq_0257	807	-	0.8	AGTGG	NF-YB	Os01g0834400;Os02g0725900;Os05g0463800;Os05g0573500
vte2-1	TF_motif_seq_0257	826	+	0.8	TCAAT	NF-YB	Os01g0834400;Os02g0725900;Os05g0463800;Os05g0573500
vte2-1	TF_motif_seq_0257	892	+	0.8	CGAAT	NF-YB	Os01g0834400;Os02g0725900;Os05g0463800;Os05g0573500
vte2-1	TF_motif_seq_0257	899	+	0.8	CCAAC	NF-YB	Os01g0834400;Os02g0725900;Os05g0463800;Os05g0573500
vte2-1	TF_motif_seq_0257	944	+	0.8	CCAAC	NF-YB	Os01g0834400;Os02g0725900;Os05g0463800;Os05g0573500
vte2-1	TF_motif_seq_0257	966	+	0.8	TCAAT	NF-YB	Os01g0834400;Os02g0725900;Os05g0463800;Os05g0573500
vte2-1	TF_motif_seq_0257	1009	+	0.8	CCAAG	NF-YB	Os01g0834400;Os02g0725900;Os05g0463800;Os05g0573500
vte2-1	TF_motif_seq_0257	1051	-	0.8	ATTCG	NF-YB	Os01g0834400;Os02g0725900;Os05g0463800;Os05g0573500
vte2-1	TF_motif_seq_0257	1092	-	0.8	ATAGG	NF-YB	Os01g0834400;Os02g0725900;Os05g0463800;Os05g0573500
vte2-1	TF_motif_seq_0257	1135	+	0.8	GCAAT	NF-YB	Os01g0834400;Os02g0725900;Os05g0463800;Os05g0573500
vte2-1	TF_motif_seq_0257	1150	-	0.8	CTTGG	NF-YB	Os01g0834400;Os02g0725900;Os05g0463800;Os05g0573500
vte2-1	TF_motif_seq_0257	1178	-	0.8	ATTAG	NF-YB	Os01g0834400;Os02g0725900;Os05g0463800;Os05g0573500
vte2-1	TF_motif_seq_0257	1203	+	0.8	CCATT	NF-YB	Os01g0834400;Os02g0725900;Os05g0463800;Os05g0573500
vte2-1	TF_motif_seq_0257	1234	+	0.8	CCAAC	NF-YB	Os01g0834400;Os02g0725900;Os05g0463800;Os05g0573500
vte2-1	TF_motif_seq_0257	1245	+	0.8	CCTAT	NF-YB	Os01g0834400;Os02g0725900;Os05g0463800;Os05g0573500
vte2-1	TF_motif_seq_0257	1253	+	0.8	CCTAT	NF-YB	Os01g0834400;Os02g0725900;Os05g0463800;Os05g0573500
vte2-1	TF_motif_seq_0257	1256	-	0.8	ATTGT	NF-YB	Os01g0834400;Os02g0725900;Os05g0463800;Os05g0573500
vte2-1	TF_motif_seq_0257	1380	+	0.8	CAAAT	NF-YB	Os01g0834400;Os02g0725900;Os05g0463800;Os05g0573500
vte2-1	TF_motif_seq_0257	1429	+	0.8	CCAAG	NF-YB	Os01g0834400;Os02g0725900;Os05g0463800;Os05g0573500
vte2-1	TF_motif_seq_0257	1437	+	0.8	CCAAC	NF-YB	Os01g0834400;Os02g0725900;Os05g0463800;Os05g0573500
vte2-1	TF_motif_seq_0257	1462	-	0.8	GTTGG	NF-YB	Os01g0834400;Os02g0725900;Os05g0463800;Os05g0573500
vte2-1	TF_motif_seq_0266	48	+	0.75	GAGCC	TCP	Os03g0785800;Os04g0194600;Os12g0616400;Os01g0213800;Os08g0544800;Os11g0175700
vte2-1	TF_motif_seq_0266	48	-	0.75	GAGCC	TCP	Os03g0785800;Os04g0194600;Os12g0616400;Os01g0213800;Os08g0544800;Os11g0175700
vte2-1	TF_motif_seq_0266	91	+	0.75	GGACG	TCP	Os03g0785800;Os04g0194600;Os12g0616400;Os01g0213800;Os08g0544800;Os11g0175700
vte2-1	TF_motif_seq_0266	91	-	0.75	GGACG	TCP	Os03g0785800;Os04g0194600;Os12g0616400;Os01g0213800;Os08g0544800;Os11g0175700
vte2-1	TF_motif_seq_0266	122	+	0.75	GGTAC	TCP	Os03g0785800;Os04g0194600;Os12g0616400;Os01g0213800;Os08g0544800;Os11g0175700
vte2-1	TF_motif_seq_0266	122	-	0.75	GGTAC	TCP	Os03g0785800;Os04g0194600;Os12g0616400;Os01g0213800;Os08g0544800;Os11g0175700
vte2-1	TF_motif_seq_0266	157	+	0.75	GAACC	TCP	Os03g0785800;Os04g0194600;Os12g0616400;Os01g0213800;Os08g0544800;Os11g0175700
vte2-1	TF_motif_seq_0266	157	-	0.75	GAACC	TCP	Os03g0785800;Os04g0194600;Os12g0616400;Os01g0213800;Os08g0544800;Os11g0175700
vte2-1	TF_motif_seq_0266	472	+	0.75	GTTCC	TCP	Os03g0785800;Os04g0194600;Os12g0616400;Os01g0213800;Os08g0544800;Os11g0175700
vte2-1	TF_motif_seq_0266	472	-	0.75	GTTCC	TCP	Os03g0785800;Os04g0194600;Os12g0616400;Os01g0213800;Os08g0544800;Os11g0175700
vte2-1	TF_motif_seq_0266	533	+	0.75	GGCTC	TCP	Os03g0785800;Os04g0194600;Os12g0616400;Os01g0213800;Os08g0544800;Os11g0175700
vte2-1	TF_motif_seq_0266	533	-	0.75	GGCTC	TCP	Os03g0785800;Os04g0194600;Os12g0616400;Os01g0213800;Os08g0544800;Os11g0175700
vte2-1	TF_motif_seq_0266	534	+	0.75	GCTCC	TCP	Os03g0785800;Os04g0194600;Os12g0616400;Os01g0213800;Os08g0544800;Os11g0175700
vte2-1	TF_motif_seq_0266	534	-	0.75	GCTCC	TCP	Os03g0785800;Os04g0194600;Os12g0616400;Os01g0213800;Os08g0544800;Os11g0175700
vte2-1	TF_motif_seq_0266	610	+	0.75	GGTCT	TCP	Os03g0785800;Os04g0194600;Os12g0616400;Os01g0213800;Os08g0544800;Os11g0175700
vte2-1	TF_motif_seq_0266	610	-	0.75	GGTCT	TCP	Os03g0785800;Os04g0194600;Os12g0616400;Os01g0213800;Os08g0544800;Os11g0175700
vte2-1	TF_motif_seq_0266	810	+	0.75	GGCTC	TCP	Os03g0785800;Os04g0194600;Os12g0616400;Os01g0213800;Os08g0544800;Os11g0175700
vte2-1	TF_motif_seq_0266	810	-	0.75	GGCTC	TCP	Os03g0785800;Os04g0194600;Os12g0616400;Os01g0213800;Os08g0544800;Os11g0175700
vte2-1	TF_motif_seq_0266	811	+	0.75	GCTCC	TCP	Os03g0785800;Os04g0194600;Os12g0616400;Os01g0213800;Os08g0544800;Os11g0175700
vte2-1	TF_motif_seq_0266	811	-	0.75	GCTCC	TCP	Os03g0785800;Os04g0194600;Os12g0616400;Os01g0213800;Os08g0544800;Os11g0175700
vte2-1	TF_motif_seq_0266	848	+	0.75	AGGCC	TCP	Os03g0785800;Os04g0194600;Os12g0616400;Os01g0213800;Os08g0544800;Os11g0175700
vte2-1	TF_motif_seq_0266	848	-	0.75	AGGCC	TCP	Os03g0785800;Os04g0194600;Os12g0616400;Os01g0213800;Os08g0544800;Os11g0175700
vte2-1	TF_motif_seq_0266	849	+	0.75	GGCCT	TCP	Os03g0785800;Os04g0194600;Os12g0616400;Os01g0213800;Os08g0544800;Os11g0175700
vte2-1	TF_motif_seq_0266	849	-	0.75	GGCCT	TCP	Os03g0785800;Os04g0194600;Os12g0616400;Os01g0213800;Os08g0544800;Os11g0175700
vte2-1	TF_motif_seq_0266	877	+	0.75	GGAGC	TCP	Os03g0785800;Os04g0194600;Os12g0616400;Os01g0213800;Os08g0544800;Os11g0175700
vte2-1	TF_motif_seq_0266	877	-	0.75	GGAGC	TCP	Os03g0785800;Os04g0194600;Os12g0616400;Os01g0213800;Os08g0544800;Os11g0175700
vte2-1	TF_motif_seq_0266	887	+	0.75	GGCAC	TCP	Os03g0785800;Os04g0194600;Os12g0616400;Os01g0213800;Os08g0544800;Os11g0175700
vte2-1	TF_motif_seq_0266	887	-	0.75	GGCAC	TCP	Os03g0785800;Os04g0194600;Os12g0616400;Os01g0213800;Os08g0544800;Os11g0175700
vte2-1	TF_motif_seq_0266	888	+	0.75	GCACC	TCP	Os03g0785800;Os04g0194600;Os12g0616400;Os01g0213800;Os08g0544800;Os11g0175700
vte2-1	TF_motif_seq_0266	888	-	0.75	GCACC	TCP	Os03g0785800;Os04g0194600;Os12g0616400;Os01g0213800;Os08g0544800;Os11g0175700
vte2-1	TF_motif_seq_0266	958	+	0.75	GCTCC	TCP	Os03g0785800;Os04g0194600;Os12g0616400;Os01g0213800;Os08g0544800;Os11g0175700
vte2-1	TF_motif_seq_0266	958	-	0.75	GCTCC	TCP	Os03g0785800;Os04g0194600;Os12g0616400;Os01g0213800;Os08g0544800;Os11g0175700
vte2-1	TF_motif_seq_0266	1022	+	0.75	GGCGC	TCP	Os03g0785800;Os04g0194600;Os12g0616400;Os01g0213800;Os08g0544800;Os11g0175700
vte2-1	TF_motif_seq_0266	1022	-	0.75	GGCGC	TCP	Os03g0785800;Os04g0194600;Os12g0616400;Os01g0213800;Os08g0544800;Os11g0175700
vte2-1	TF_motif_seq_0266	1023	+	0.75	GCGCC	TCP	Os03g0785800;Os04g0194600;Os12g0616400;Os01g0213800;Os08g0544800;Os11g0175700
vte2-1	TF_motif_seq_0266	1023	-	0.75	GCGCC	TCP	Os03g0785800;Os04g0194600;Os12g0616400;Os01g0213800;Os08g0544800;Os11g0175700
vte2-1	TF_motif_seq_0266	1027	+	0.75	CGTCC	TCP	Os03g0785800;Os04g0194600;Os12g0616400;Os01g0213800;Os08g0544800;Os11g0175700
vte2-1	TF_motif_seq_0266	1027	-	0.75	CGTCC	TCP	Os03g0785800;Os04g0194600;Os12g0616400;Os01g0213800;Os08g0544800;Os11g0175700
vte2-1	TF_motif_seq_0266	1080	+	0.75	GGTGC	TCP	Os03g0785800;Os04g0194600;Os12g0616400;Os01g0213800;Os08g0544800;Os11g0175700
vte2-1	TF_motif_seq_0266	1080	-	0.75	GGTGC	TCP	Os03g0785800;Os04g0194600;Os12g0616400;Os01g0213800;Os08g0544800;Os11g0175700
vte2-1	TF_motif_seq_0266	1108	+	0.75	GGTGC	TCP	Os03g0785800;Os04g0194600;Os12g0616400;Os01g0213800;Os08g0544800;Os11g0175700
vte2-1	TF_motif_seq_0266	1108	-	0.75	GGTGC	TCP	Os03g0785800;Os04g0194600;Os12g0616400;Os01g0213800;Os08g0544800;Os11g0175700
vte2-1	TF_motif_seq_0266	1153	+	0.75	GGAGC	TCP	Os03g0785800;Os04g0194600;Os12g0616400;Os01g0213800;Os08g0544800;Os11g0175700
vte2-1	TF_motif_seq_0266	1153	-	0.75	GGAGC	TCP	Os03g0785800;Os04g0194600;Os12g0616400;Os01g0213800;Os08g0544800;Os11g0175700
vte2-1	TF_motif_seq_0266	1182	+	0.75	GGCGC	TCP	Os03g0785800;Os04g0194600;Os12g0616400;Os01g0213800;Os08g0544800;Os11g0175700
vte2-1	TF_motif_seq_0266	1182	-	0.75	GGCGC	TCP	Os03g0785800;Os04g0194600;Os12g0616400;Os01g0213800;Os08g0544800;Os11g0175700
vte2-1	TF_motif_seq_0266	1242	+	0.75	GCACC	TCP	Os03g0785800;Os04g0194600;Os12g0616400;Os01g0213800;Os08g0544800;Os11g0175700
vte2-1	TF_motif_seq_0266	1242	-	0.75	GCACC	TCP	Os03g0785800;Os04g0194600;Os12g0616400;Os01g0213800;Os08g0544800;Os11g0175700
vte2-1	TF_motif_seq_0266	1250	+	0.75	CGCCC	TCP	Os03g0785800;Os04g0194600;Os12g0616400;Os01g0213800;Os08g0544800;Os11g0175700
vte2-1	TF_motif_seq_0266	1250	-	0.75	CGCCC	TCP	Os03g0785800;Os04g0194600;Os12g0616400;Os01g0213800;Os08g0544800;Os11g0175700
vte2-1	TF_motif_seq_0266	1333	+	0.75	GGATC	TCP	Os03g0785800;Os04g0194600;Os12g0616400;Os01g0213800;Os08g0544800;Os11g0175700
vte2-1	TF_motif_seq_0266	1333	-	0.75	GGATC	TCP	Os03g0785800;Os04g0194600;Os12g0616400;Os01g0213800;Os08g0544800;Os11g0175700
vte2-1	TF_motif_seq_0266	1334	+	0.75	GATCC	TCP	Os03g0785800;Os04g0194600;Os12g0616400;Os01g0213800;Os08g0544800;Os11g0175700
vte2-1	TF_motif_seq_0266	1334	-	0.75	GATCC	TCP	Os03g0785800;Os04g0194600;Os12g0616400;Os01g0213800;Os08g0544800;Os11g0175700
vte2-1	TF_motif_seq_0266	1426	+	0.75	GAGCC	TCP	Os03g0785800;Os04g0194600;Os12g0616400;Os01g0213800;Os08g0544800;Os11g0175700
vte2-1	TF_motif_seq_0266	1426	-	0.75	GAGCC	TCP	Os03g0785800;Os04g0194600;Os12g0616400;Os01g0213800;Os08g0544800;Os11g0175700
vte2-1	TF_motif_seq_0266	1434	+	0.75	AGGCC	TCP	Os03g0785800;Os04g0194600;Os12g0616400;Os01g0213800;Os08g0544800;Os11g0175700
vte2-1	TF_motif_seq_0266	1434	-	0.75	AGGCC	TCP	Os03g0785800;Os04g0194600;Os12g0616400;Os01g0213800;Os08g0544800;Os11g0175700
vte2-1	TF_motif_seq_0266	1435	+	0.75	GGCCA	TCP	Os03g0785800;Os04g0194600;Os12g0616400;Os01g0213800;Os08g0544800;Os11g0175700
vte2-1	TF_motif_seq_0266	1435	-	0.75	GGCCA	TCP	Os03g0785800;Os04g0194600;Os12g0616400;Os01g0213800;Os08g0544800;Os11g0175700
vte2-1	TF_motif_seq_0266	1465	+	0.75	GGACT	TCP	Os03g0785800;Os04g0194600;Os12g0616400;Os01g0213800;Os08g0544800;Os11g0175700
vte2-1	TF_motif_seq_0266	1465	-	0.75	GGACT	TCP	Os03g0785800;Os04g0194600;Os12g0616400;Os01g0213800;Os08g0544800;Os11g0175700
vte2-1	TF_motif_seq_0266	1477	+	0.75	GCGCC	TCP	Os03g0785800;Os04g0194600;Os12g0616400;Os01g0213800;Os08g0544800;Os11g0175700
vte2-1	TF_motif_seq_0266	1477	-	0.75	GCGCC	TCP	Os03g0785800;Os04g0194600;Os12g0616400;Os01g0213800;Os08g0544800;Os11g0175700
vte2-1	TF_motif_seq_0282	18	-	1	tTTATT	Alpha-amylase	M24286;M24287
vte2-1	TF_motif_seq_0282	139	-	1	tTTATT	Alpha-amylase	M24286;M24287
vte2-1	TF_motif_seq_0282	275	+	1	AATAAa	Alpha-amylase	M24286;M24287
vte2-1	TF_motif_seq_0282	1385	+	1	AATAAa	Alpha-amylase	M24286;M24287
vte2-1	TF_motif_seq_0282	1398	+	1	AATAAa	Alpha-amylase	M24286;M24287
vte2-1	TF_motif_seq_0292	1167	+	1	gCCGAC	AP2; ERF;ERF	Os08g0565200;Os01g0165000;Os02g0677300;Os03g0174400;Os05g0346200;Os06g0127100;Os01g0968800;Os04g0572400;Os05g0473300;Os06g0165600;Os08g0545500;Os09g0522000;Os09g0522100;Os09g0522200
vte2-1	TF_motif_seq_0292	1491	+	0.952	tCCGAC	AP2; ERF;ERF	Os08g0565200;Os01g0165000;Os02g0677300;Os03g0174400;Os05g0346200;Os06g0127100;Os01g0968800;Os04g0572400;Os05g0473300;Os06g0165600;Os08g0545500;Os09g0522000;Os09g0522100;Os09g0522200
vte2-1	TF_motif_seq_0312	1184	-	1	cGCACG	BES1	Os07g0580500
vte2-1	TF_motif_seq_0316	1025	+	0.833	GCCGTc	(Others)	L345501
vte2-1	TF_motif_seq_0316	1025	-	0.833	gCCGTC	(Others)	L345501
vte2-1	TF_motif_seq_0316	1170	+	0.833	GACGCc	(Others)	L345501
vte2-1	TF_motif_seq_0316	1170	-	0.833	gACGCC	(Others)	L345501
vte2-1	TF_motif_seq_0327	115	+	0.833	TACTTa	(Others)	L34551
vte2-1	TF_motif_seq_0327	115	-	0.833	tACTTA	(Others)	L34551
vte2-1	TF_motif_seq_0327	424	+	0.833	TACTTa	(Others)	L34551
vte2-1	TF_motif_seq_0327	424	-	0.833	tACTTA	(Others)	L34551
vte2-1	TF_motif_seq_0327	438	+	0.833	TGCGTa	(Others)	L34551
vte2-1	TF_motif_seq_0327	438	-	0.833	tGCGTA	(Others)	L34551
vte2-1	TF_motif_seq_0327	616	+	0.833	TACGCa	(Others)	L34551
vte2-1	TF_motif_seq_0327	616	-	0.833	tACGCA	(Others)	L34551
vte2-1	TF_motif_seq_0347	225	+	0.857	AATTAag	Alpha-amylase	M24286;M24287
vte2-1	TF_motif_seq_0347	426	-	0.857	ctTAATT	Alpha-amylase	M24286;M24287
vte2-1	TF_motif_seq_0347	429	+	0.857	AATTAat	Alpha-amylase	M24286;M24287
vte2-1	TF_motif_seq_0347	430	-	0.857	atTAATT	Alpha-amylase	M24286;M24287
vte2-1	TF_motif_seq_0347	1137	+	0.857	AATTAat	Alpha-amylase	M24286;M24287
vte2-1	TF_motif_seq_0356	1166	+	0.857	AGCCGac	ERF	Os02g0782700
vte2-1	TF_motif_seq_0376	213	+	0.857	TAACAta	Myb/SANT; MYB	Os01g0812000
vte2-1	TF_motif_seq_0379	213	+	0.96	TAACAta	Alpha-amylase	X16509
vte2-1	TF_motif_seq_0422	870	-	0.875	gatGCATG	LEA_5	U22102
vte2-1	TF_motif_seq_0422	974	+	0.75	CATGCctt	LEA_5	U22102
vte2-1	TF_motif_seq_0431	885	-	0.875	gtgGCACC	TCP	Os04g0194600;Os08g0544800
vte2-1	TF_motif_seq_0431	1080	+	0.75	GGTGCtac	TCP	Os04g0194600;Os08g0544800
vte2-1	TF_motif_seq_0431	1334	+	0.75	GATCCcag	TCP	Os04g0194600;Os08g0544800
vte2-1	TF_motif_seq_0431	1462	-	0.75	gttGGACT	TCP	Os04g0194600;Os08g0544800
vte2-1	TF_motif_seq_0508	74	+	0.75	atCGTTCaa	SBP	Os01g0292900;Os01g0922600;Os02g0139400;Os02g0174100;Os02g0177300;Os03g0833300;Os04g0551500;Os05g0408200;Os06g0659100;Os06g0663500;Os06g0703500;Os08g0509600;Os08g0513700;Os08g0531600;Os09g0491532;Os09g0507100;Os11g0496600
vte2-1	TF_motif_seq_0508	297	+	0.75	ttCGAACag	SBP	Os01g0292900;Os01g0922600;Os02g0139400;Os02g0174100;Os02g0177300;Os03g0833300;Os04g0551500;Os05g0408200;Os06g0659100;Os06g0663500;Os06g0703500;Os08g0509600;Os08g0513700;Os08g0531600;Os09g0491532;Os09g0507100;Os11g0496600
vte2-1	TF_motif_seq_0508	438	+	0.75	tgCGTAAat	SBP	Os01g0292900;Os01g0922600;Os02g0139400;Os02g0174100;Os02g0177300;Os03g0833300;Os04g0551500;Os05g0408200;Os06g0659100;Os06g0663500;Os06g0703500;Os08g0509600;Os08g0513700;Os08g0531600;Os09g0491532;Os09g0507100;Os11g0496600
vte2-1	TF_motif_seq_0508	583	+	0.75	atAGTACaa	SBP	Os01g0292900;Os01g0922600;Os02g0139400;Os02g0174100;Os02g0177300;Os03g0833300;Os04g0551500;Os05g0408200;Os06g0659100;Os06g0663500;Os06g0703500;Os08g0509600;Os08g0513700;Os08g0531600;Os09g0491532;Os09g0507100;Os11g0496600
vte2-1	TF_motif_seq_0508	613	-	0.75	ctCTACGca	SBP	Os01g0292900;Os01g0922600;Os02g0139400;Os02g0174100;Os02g0177300;Os03g0833300;Os04g0551500;Os05g0408200;Os06g0659100;Os06g0663500;Os06g0703500;Os08g0509600;Os08g0513700;Os08g0531600;Os09g0491532;Os09g0507100;Os11g0496600
vte2-1	TF_motif_seq_0025	238	+	0.8	CTATAaaaat	(Motif sequence only)
vte2-1	TF_motif_seq_0039	1479	+	0.8	GCCGCctcgc	(Motif sequence only)
vte2-1	TF_motif_seq_0070	365	-	0.727	ctatagGAAAG	(Motif sequence only)
vte2-1	TF_motif_seq_0092	946	+	0.75	AACAAcctcact	(Motif sequence only)
vte2-1	TF_motif_seq_0092	1389	+	0.75	AACAAacaaaat	(Motif sequence only)
vte2-1	TF_motif_seq_0121	867	-	0.769	cttgatgcATGGA	(Motif sequence only)
vte2-1	TF_motif_seq_0150	477	-	0.733	taactaccacAAAAG	(Motif sequence only)
vte2-1	TF_motif_seq_0150	651	+	0.733	CTTTTttctagcgta	(Motif sequence only)
vte2-1	TF_motif_seq_0226	7	-	0.67	tagtaatacggTTTATttctacattatg	(Motif sequence only)
vte2-1	TF_motif_seq_0226	264	+	0.714	tatgttttttaaATAAAttttctataga	(Motif sequence only)
vte2-1	TF_motif_seq_0259	44	-	0.8	CGTTG	(Motif sequence only)
vte2-1	TF_motif_seq_0259	73	-	0.8	CATCG	(Motif sequence only)
vte2-1	TF_motif_seq_0259	91	+	0.8	GGACG	(Motif sequence only)
vte2-1	TF_motif_seq_0259	126	-	0.8	CTTCG	(Motif sequence only)
vte2-1	TF_motif_seq_0259	200	+	0.8	CGAAG	(Motif sequence only)
vte2-1	TF_motif_seq_0259	220	+	0.8	CGACT	(Motif sequence only)
vte2-1	TF_motif_seq_0259	615	+	0.8	CTACG	(Motif sequence only)
vte2-1	TF_motif_seq_0259	701	-	0.8	CGTCT	(Motif sequence only)
vte2-1	TF_motif_seq_0259	734	-	0.8	CGTCT	(Motif sequence only)
vte2-1	TF_motif_seq_0259	777	+	0.8	CGAAG	(Motif sequence only)
vte2-1	TF_motif_seq_0259	852	-	0.8	CTTCG	(Motif sequence only)
vte2-1	TF_motif_seq_0259	900	+	0.8	CAACG	(Motif sequence only)
vte2-1	TF_motif_seq_0259	905	-	0.8	CTTCG	(Motif sequence only)
vte2-1	TF_motif_seq_0259	918	-	0.8	CCTCG	(Motif sequence only)
vte2-1	TF_motif_seq_0259	982	-	0.8	TGTCG	(Motif sequence only)
vte2-1	TF_motif_seq_0259	987	-	0.8	CATCG	(Motif sequence only)
vte2-1	TF_motif_seq_0259	990	-	0.8	CGTTG	(Motif sequence only)
vte2-1	TF_motif_seq_0259	1024	+	0.8	CGCCG	(Motif sequence only)
vte2-1	TF_motif_seq_0259	1024	-	0.8	CGCCG	(Motif sequence only)
vte2-1	TF_motif_seq_0259	1027	-	0.8	CGTCC	(Motif sequence only)
vte2-1	TF_motif_seq_0259	1104	-	0.8	CTTCG	(Motif sequence only)
vte2-1	TF_motif_seq_0259	1169	+	1	CGACG	(Motif sequence only)
vte2-1	TF_motif_seq_0259	1169	-	0.8	CGACG	(Motif sequence only)
vte2-1	TF_motif_seq_0259	1478	+	0.8	CGCCG	(Motif sequence only)
vte2-1	TF_motif_seq_0259	1478	-	0.8	CGCCG	(Motif sequence only)
vte2-1	TF_motif_seq_0259	1483	-	0.8	CCTCG	(Motif sequence only)
vte2-1	TF_motif_seq_0259	1493	+	1	CGACG	(Motif sequence only)
vte2-1	TF_motif_seq_0259	1493	-	0.8	CGACG	(Motif sequence only)
vte2-1	TF_motif_seq_0274	131	+	0.8	TGTGA	(Motif sequence only)
vte2-1	TF_motif_seq_0274	145	-	0.8	TGATA	(Motif sequence only)
vte2-1	TF_motif_seq_0274	150	+	0.8	TTTCA	(Motif sequence only)
vte2-1	TF_motif_seq_0274	190	-	0.8	TCACA	(Motif sequence only)
vte2-1	TF_motif_seq_0274	213	-	0.8	TAACA	(Motif sequence only)
vte2-1	TF_motif_seq_0274	304	+	0.8	AGTCA	(Motif sequence only)
vte2-1	TF_motif_seq_0274	306	-	0.8	TCACA	(Motif sequence only)
vte2-1	TF_motif_seq_0274	337	-	0.8	TGATA	(Motif sequence only)
vte2-1	TF_motif_seq_0274	380	+	0.8	TTTCA	(Motif sequence only)
vte2-1	TF_motif_seq_0274	546	+	0.8	TGCCA	(Motif sequence only)
vte2-1	TF_motif_seq_0274	546	-	0.8	TGCCA	(Motif sequence only)
vte2-1	TF_motif_seq_0274	577	-	0.8	TCACA	(Motif sequence only)
vte2-1	TF_motif_seq_0274	601	-	0.8	TGATA	(Motif sequence only)
vte2-1	TF_motif_seq_0274	677	+	0.8	TCTCA	(Motif sequence only)
vte2-1	TF_motif_seq_0274	772	-	0.8	TGAAA	(Motif sequence only)
vte2-1	TF_motif_seq_0274	803	+	0.8	TTTCA	(Motif sequence only)
vte2-1	TF_motif_seq_0274	821	-	0.8	TCACA	(Motif sequence only)
vte2-1	TF_motif_seq_0274	858	-	0.8	TGAAA	(Motif sequence only)
vte2-1	TF_motif_seq_0274	864	-	0.8	TGACT	(Motif sequence only)
vte2-1	TF_motif_seq_0274	886	+	0.8	TGGCA	(Motif sequence only)
vte2-1	TF_motif_seq_0274	886	-	0.8	TGGCA	(Motif sequence only)
vte2-1	TF_motif_seq_0274	912	+	0.8	TGTAA	(Motif sequence only)
vte2-1	TF_motif_seq_0274	926	-	0.8	TCACA	(Motif sequence only)
vte2-1	TF_motif_seq_0274	964	+	1	TGTCA	(Motif sequence only)
vte2-1	TF_motif_seq_0274	964	-	0.8	TGTCA	(Motif sequence only)
vte2-1	TF_motif_seq_0274	982	+	0.8	TGTCG	(Motif sequence only)
vte2-1	TF_motif_seq_0274	1058	+	0.8	TGTCT	(Motif sequence only)
vte2-1	TF_motif_seq_0274	1127	+	0.8	TGGCA	(Motif sequence only)
vte2-1	TF_motif_seq_0274	1127	-	0.8	TGGCA	(Motif sequence only)
vte2-1	TF_motif_seq_0274	1143	+	0.8	TGACA	(Motif sequence only)
vte2-1	TF_motif_seq_0274	1143	-	1	TGACA	(Motif sequence only)
vte2-1	TF_motif_seq_0274	1353	+	0.8	TTTCA	(Motif sequence only)
vte2-1	TF_motif_seq_0291	1163	+	1	AGCAGc	(Motif sequence only)
vte2-1	TF_motif_seq_0309	1030	+	1	CCTTTt	(Motif sequence only)
vte2-1	TF_motif_seq_0321	174	+	1	GGAAAa	(Motif sequence only)
vte2-1	TF_motif_seq_0321	181	-	1	aTTTTC	(Motif sequence only)
vte2-1	TF_motif_seq_0321	280	-	1	aTTTTC	(Motif sequence only)
vte2-1	TF_motif_seq_0321	325	-	1	tTTTTC	(Motif sequence only)
vte2-1	TF_motif_seq_0321	326	-	1	tTTTCC	(Motif sequence only)
vte2-1	TF_motif_seq_0321	338	+	1	GATAAa	(Motif sequence only)
vte2-1	TF_motif_seq_0321	653	-	1	tTTTTC	(Motif sequence only)
vte2-1	TF_motif_seq_0321	859	+	1	GAAAAt	(Motif sequence only)
vte2-1	TF_motif_seq_0321	895	-	1	aTTTCC	(Motif sequence only)
vte2-1	TF_motif_seq_0321	1033	-	1	tTTACC	(Motif sequence only)
vte2-1	TF_motif_seq_0321	1205	-	1	aTTTTC	(Motif sequence only)
vte2-1	TF_motif_seq_0321	1228	+	1	GGAAAa	(Motif sequence only)
vte2-1	TF_motif_seq_0321	1272	+	1	GAAAAt	(Motif sequence only)
vte2-1	TF_motif_seq_0321	1286	+	1	GGAAAa	(Motif sequence only)
vte2-1	TF_motif_seq_0324	1167	+	1	gCCGAC	(Motif sequence only)
vte2-1	TF_motif_seq_0324	1491	+	0.952	tCCGAC	(Motif sequence only)
vte2-1	TF_motif_seq_0343	264	-	0.857	taTGTTT	(Motif sequence only)
vte2-1	TF_motif_seq_0343	319	-	0.857	tcTGTTT	(Motif sequence only)
vte2-1	TF_motif_seq_0343	449	-	0.857	tcTGTTT	(Motif sequence only)
vte2-1	TF_motif_seq_0343	454	-	1	ttTGTTT	(Motif sequence only)
vte2-1	TF_motif_seq_0343	799	-	0.857	gtTGTTT	(Motif sequence only)
vte2-1	TF_motif_seq_0343	1388	+	1	AAACAaa	(Motif sequence only)
vte2-1	TF_motif_seq_0343	1392	+	1	AAACAaa	(Motif sequence only)
vte2-1	TF_motif_seq_0344	453	-	0.857	ttTTGTT	(Motif sequence only)
vte2-1	TF_motif_seq_0344	946	+	0.857	AACAAcc	(Motif sequence only)
vte2-1	TF_motif_seq_0344	1389	+	1	AACAAac	(Motif sequence only)
vte2-1	TF_motif_seq_0344	1393	+	0.857	AACAAaa	(Motif sequence only)
vte2-1	TF_motif_seq_0372	1077	+	0.857	GTAGGtg	(Motif sequence only)
vte2-1	TF_motif_seq_0378	213	+	0.857	TAACAta	(Motif sequence only)
vte2-1	TF_motif_seq_0380	26	-	0.857	taCATTA	(Motif sequence only)
vte2-1	TF_motif_seq_0380	213	+	0.857	TAACAta	(Motif sequence only)
vte2-1	TF_motif_seq_0380	659	+	0.857	TAGCGta	(Motif sequence only)
vte2-1	TF_motif_seq_0389	141	+	0.857	TATTTga	(Motif sequence only)
vte2-1	TF_motif_seq_0389	148	+	0.857	TATTTca	(Motif sequence only)
vte2-1	TF_motif_seq_0389	247	+	0.857	TATTTta	(Motif sequence only)
vte2-1	TF_motif_seq_0389	252	-	0.857	taAAATA	(Motif sequence only)
vte2-1	TF_motif_seq_0389	272	-	1	ttAAATA	(Motif sequence only)
vte2-1	TF_motif_seq_0389	1321	-	0.857	taAAATA	(Motif sequence only)
vte2-1	TF_motif_seq_0389	1351	+	0.857	TATTTca	(Motif sequence only)
vte2-1	TF_motif_seq_0390	938	+	1	TCATCac	(Motif sequence only)
vte2-1	TF_motif_seq_0390	1120	-	1	gtGATGA	(Motif sequence only)
vte2-1	TF_motif_seq_0390	1222	+	0.857	TCATCag	(Motif sequence only)
vte2-1	TF_motif_seq_0390	1355	+	0.857	TCATCag	(Motif sequence only)
vte2-1	TF_motif_seq_0392	843	+	1	TGCAAag	(Motif sequence only)
vte2-1	TF_motif_seq_0392	1405	+	0.857	TGCAAaa	(Motif sequence only)
vte2-1	TF_motif_seq_0392	1446	-	1	ctTTGCA	(Motif sequence only)
vte2-1	TF_motif_seq_0397	1136	-	0.857	caATTAA	(Motif sequence only)
vte2-1	TF_motif_seq_0397	1139	+	0.857	TTAATga	(Motif sequence only)
vte2-1	TF_motif_seq_0425	1366	+	0.75	CCAGCtga	(Motif sequence only)
vte2-1	TF_motif_seq_0425	1429	+	0.75	CCAAGagg	(Motif sequence only)
vte2-1	TF_motif_seq_0425	1480	-	0.75	ccgCCTCG	(Motif sequence only)
vte2-1	TF_motif_seq_0429	1282	+	0.75	GCGCGgaa	(Motif sequence only)
vte2-1	TF_motif_seq_0429	1284	+	0.875	GCGGAaaa	(Motif sequence only)
vte2-1	TF_motif_seq_0458	48	-	0.941	gaGCCAAa	(Motif sequence only)
vte2-1	TF_motif_seq_0458	554	-	0.941	caGCCAAa	(Motif sequence only)
vte3	TFmatrixID_0127	1161	-	0.942	ttTGTTGc	AP2; B3; RAV	Os01g0693400
vte3	TFmatrixID_0130	375	+	0.999	gATATAattc	AT-Hook	Os06g0326000;Os07g0184800;Os08g0512400;Os09g0491708
vte3	TFmatrixID_0130	487	+	0.944	tATATAttta	AT-Hook	Os06g0326000;Os07g0184800;Os08g0512400;Os09g0491708
vte3	TFmatrixID_0131	232	-	0.999	TTTATttcc	AT-Hook	Os06g0326000;Os07g0184800;Os08g0512400;Os09g0491708
vte3	TFmatrixID_0131	616	-	0.999	TTTATttgt	AT-Hook	Os06g0326000;Os07g0184800;Os08g0512400;Os09g0491708
vte3	TFmatrixID_0131	765	+	0.999	cacaATAAA	AT-Hook	Os06g0326000;Os07g0184800;Os08g0512400;Os09g0491708
vte3	TFmatrixID_0131	942	+	0.999	tagcATAAA	AT-Hook	Os06g0326000;Os07g0184800;Os08g0512400;Os09g0491708
vte3	TFmatrixID_0131	1108	+	0.999	acaaATAAA	AT-Hook	Os06g0326000;Os07g0184800;Os08g0512400;Os09g0491708
vte3	TFmatrixID_0131	1342	-	0.999	TTTATttgc	AT-Hook	Os06g0326000;Os07g0184800;Os08g0512400;Os09g0491708
vte3	TFmatrixID_0133	583	-	0.999	TTTTTactt	AT-Hook	Os01g0835600
vte3	TFmatrixID_0136	766	+	0.995	acaATAAA	AT-Hook	Os07g0184800
vte3	TFmatrixID_0146	105	-	0.992	ATTATgttt	AT-Hook	Os07g0184800
vte3	TFmatrixID_0146	374	+	0.99	cgatATAAT	AT-Hook	Os07g0184800
vte3	TFmatrixID_0148	226	-	0.99	cATTTTtt	AT-Hook	Os02g0824300;Os06g0326000;Os07g0184800;Os08g0512400;Os09g0491708
vte3	TFmatrixID_0148	507	-	1	aATTTTtt	AT-Hook	Os02g0824300;Os06g0326000;Os07g0184800;Os08g0512400;Os09g0491708
vte3	TFmatrixID_0148	769	+	0.993	atAAAATa	AT-Hook	Os02g0824300;Os06g0326000;Os07g0184800;Os08g0512400;Os09g0491708
vte3	TFmatrixID_0149	488	+	0.981	ataTATTTat	AT-Hook	Os11g0602200
vte3	TFmatrixID_0149	770	-	0.994	taAAATAttt	AT-Hook	Os11g0602200
vte3	TFmatrixID_0149	772	+	0.994	aaaTATTTtc	AT-Hook	Os11g0602200
vte3	TFmatrixID_0150	771	+	0.997	aaAATATttt	AT-Hook	Os01g0835600
vte3	TFmatrixID_0150	771	-	0.997	aaaATATTtt	AT-Hook	Os01g0835600
vte3	TFmatrixID_0152	507	-	1	AATTTtt	AT-Hook	Os06g0326000
vte3	TFmatrixID_0154	771	+	0.926	aAAATAtt	AT-Hook	Os07g0184800
vte3	TFmatrixID_0154	773	-	0.926	aaTATTTt	AT-Hook	Os07g0184800
vte3	TFmatrixID_0174	367	-	0.75	gctCATGC	bHLH	Os01g0915600;Os02g0564700;Os02g0705500;Os03g0231950;Os03g0728900;Os03g0802900;Os04g0350700;Os05g0103000;Os06g0193400;Os06g0275600;Os07g0193800;Os08g0487700;Os08g0524800;Os08g0536800;Os09g0417400;Os09g0474100;Os09g0501600;Os09g0510500
vte3	TFmatrixID_0174	780	-	0.75	tcaCTTGC	bHLH	Os01g0915600;Os02g0564700;Os02g0705500;Os03g0231950;Os03g0728900;Os03g0802900;Os04g0350700;Os05g0103000;Os06g0193400;Os06g0275600;Os07g0193800;Os08g0487700;Os08g0524800;Os08g0536800;Os09g0417400;Os09g0474100;Os09g0501600;Os09g0510500
vte3	TFmatrixID_0174	1010	+	0.75	GCAAGtcc	bHLH	Os01g0915600;Os02g0564700;Os02g0705500;Os03g0231950;Os03g0728900;Os03g0802900;Os04g0350700;Os05g0103000;Os06g0193400;Os06g0275600;Os07g0193800;Os08g0487700;Os08g0524800;Os08g0536800;Os09g0417400;Os09g0474100;Os09g0501600;Os09g0510500
vte3	TFmatrixID_0174	1208	-	0.75	acaCATGC	bHLH	Os01g0915600;Os02g0564700;Os02g0705500;Os03g0231950;Os03g0728900;Os03g0802900;Os04g0350700;Os05g0103000;Os06g0193400;Os06g0275600;Os07g0193800;Os08g0487700;Os08g0524800;Os08g0536800;Os09g0417400;Os09g0474100;Os09g0501600;Os09g0510500
vte3	TFmatrixID_0174	1233	+	0.75	GCATGttc	bHLH	Os01g0915600;Os02g0564700;Os02g0705500;Os03g0231950;Os03g0728900;Os03g0802900;Os04g0350700;Os05g0103000;Os06g0193400;Os06g0275600;Os07g0193800;Os08g0487700;Os08g0524800;Os08g0536800;Os09g0417400;Os09g0474100;Os09g0501600;Os09g0510500
vte3	TFmatrixID_0176	779	+	0.847	ttcACTTGc	bHLH	Os01g0900800;Os02g0564700;Os02g0603600;Os04g0489600;Os08g0506700;Os09g0487900
vte3	TFmatrixID_0176	1003	-	0.916	cCAAGTagc	bHLH	Os01g0900800;Os02g0564700;Os02g0603600;Os04g0489600;Os08g0506700;Os09g0487900
vte3	TFmatrixID_0184	1468	+	0.924	catACGTGat	bZIP	Os02g0766700;Os06g0211200;Os09g0456200
vte3	TFmatrixID_0185	276	-	0.904	ctTGACGttc	bZIP	Os01g0279900;Os01g0808100;Os01g0859500;Os02g0194900;Os03g0318600;Os04g0637000;Os05g0443850;Os05g0492000;Os06g0265400;Os06g0614100;Os07g0687700;Os08g0176900;Os09g0280500;Os09g0489500;Os11g0152700;Os12g0152900
vte3	TFmatrixID_0191	276	-	0.948	cttGACGTtc	B3; bZIP;bZIP	LOC_Os02g22280;Os01g0279900;Os01g0808100;Os01g0859500;Os02g0194900;Os03g0318600;Os04g0637000;Os05g0443850;Os05g0492000;Os06g0265400;Os06g0614100;Os07g0687700;Os08g0176900;Os09g0280500;Os09g0489500;Os11g0152700;Os12g0152900
vte3	TFmatrixID_0193	115	-	0.75	aaaCTTGT	bZIP	Os02g0766700;Os05g0489700;Os06g0211200;Os09g0456200
vte3	TFmatrixID_0193	223	+	0.75	ACACAttt	bZIP	Os02g0766700;Os05g0489700;Os06g0211200;Os09g0456200
vte3	TFmatrixID_0193	340	-	0.75	accCATGT	bZIP	Os02g0766700;Os05g0489700;Os06g0211200;Os09g0456200
vte3	TFmatrixID_0193	559	-	0.75	aaaGGTGT	bZIP	Os02g0766700;Os05g0489700;Os06g0211200;Os09g0456200
vte3	TFmatrixID_0193	608	-	0.75	aaaCATGT	bZIP	Os02g0766700;Os05g0489700;Os06g0211200;Os09g0456200
vte3	TFmatrixID_0193	610	+	0.75	ACATGttt	bZIP	Os02g0766700;Os05g0489700;Os06g0211200;Os09g0456200
vte3	TFmatrixID_0193	639	-	0.75	agaGGTGT	bZIP	Os02g0766700;Os05g0489700;Os06g0211200;Os09g0456200
vte3	TFmatrixID_0193	806	+	0.75	ACACAtat	bZIP	Os02g0766700;Os05g0489700;Os06g0211200;Os09g0456200
vte3	TFmatrixID_0193	859	-	0.75	ataCTTGT	bZIP	Os02g0766700;Os05g0489700;Os06g0211200;Os09g0456200
vte3	TFmatrixID_0193	1068	-	0.75	ccaCATGT	bZIP	Os02g0766700;Os05g0489700;Os06g0211200;Os09g0456200
vte3	TFmatrixID_0193	1192	+	0.75	ACACGact	bZIP	Os02g0766700;Os05g0489700;Os06g0211200;Os09g0456200
vte3	TFmatrixID_0193	1208	+	0.75	ACACAtgc	bZIP	Os02g0766700;Os05g0489700;Os06g0211200;Os09g0456200
vte3	TFmatrixID_0193	1469	+	0.75	ATACGtga	bZIP	Os02g0766700;Os05g0489700;Os06g0211200;Os09g0456200
vte3	TFmatrixID_0193	1469	-	0.75	ataCGTGA	bZIP	Os02g0766700;Os05g0489700;Os06g0211200;Os09g0456200
vte3	TFmatrixID_0195	276	-	0.968	ctTGACGttc	B3; bZIP;bZIP	LOC_Os02g22280;Os01g0279900;Os01g0808100;Os01g0859500;Os02g0194900;Os03g0318600;Os04g0637000;Os05g0443850;Os05g0492000;Os06g0265400;Os06g0614100;Os07g0687700;Os08g0176900;Os09g0280500;Os09g0489500;Os11g0152700;Os12g0152900
vte3	TFmatrixID_0196	277	-	0.985	tTGACGtt	B3; bZIP;bZIP	LOC_Os02g22280;Os01g0279900;Os01g0808100;Os01g0859500;Os02g0194900;Os03g0318600;Os04g0637000;Os05g0443850;Os05g0492000;Os06g0265400;Os06g0614100;Os07g0687700;Os08g0176900;Os09g0280500;Os09g0489500;Os11g0152700;Os12g0152900
vte3	TFmatrixID_0197	276	-	0.928	ctTGACGttc	bZIP	Os01g0279900;Os01g0808100;Os01g0859500;Os02g0194900;Os03g0318600;Os04g0637000;Os05g0443850;Os05g0492000;Os06g0265400;Os06g0614100;Os07g0687700;Os08g0176900;Os09g0280500;Os09g0489500;Os11g0152700;Os12g0152900
vte3	TFmatrixID_0199	276	-	0.984	ctTGACGttc	bZIP	Os01g0279900;Os01g0808100;Os01g0859500;Os02g0194900;Os03g0318600;Os04g0637000;Os05g0443850;Os05g0492000;Os06g0265400;Os06g0614100;Os07g0687700;Os08g0176900;Os09g0280500;Os09g0489500;Os11g0152700;Os12g0152900
vte3	TFmatrixID_0211	403	-	0.999	cAGTGTt	C2H2	Os03g0437200;Os12g0583700
vte3	TFmatrixID_0211	1458	+	0.999	tACACTa	C2H2	Os03g0437200;Os12g0583700
vte3	TFmatrixID_0213	403	-	0.999	cAGTGTt	C2H2	Os03g0437100;Os03g0437200;Os12g0583700
vte3	TFmatrixID_0213	1458	+	1	tACACTa	C2H2	Os03g0437100;Os03g0437200;Os12g0583700
vte3	TFmatrixID_0216	24	+	1	tTCACTc	C2H2	Os01g0838600;Os01g0839100;Os03g0279700;Os03g0820300;Os03g0820400;Os05g0114400;Os05g0460900
vte3	TFmatrixID_0216	154	+	1	tTCACTc	C2H2	Os01g0838600;Os01g0839100;Os03g0279700;Os03g0820300;Os03g0820400;Os05g0114400;Os05g0460900
vte3	TFmatrixID_0227	109	+	0.954	tgTTTGAaac	TCR	Os01g0761100
vte3	TFmatrixID_0227	902	+	0.977	atTTTGAatt	TCR	Os01g0761100
vte3	TFmatrixID_0227	1488	-	0.954	tttTCAAAca	TCR	Os01g0761100
vte3	TFmatrixID_0254	334	-	0.948	tgATGTAccca	EIN3	Os03g0324200;Os03g0324300;Os07g0685700;Os08g0508700
vte3	TFmatrixID_0255	1217	-	0.972	tacATACAt	EIN3	Os03g0324200;Os03g0324300;Os07g0685700;Os08g0508700
vte3	TFmatrixID_0255	1454	-	0.974	acgATACAc	EIN3	Os03g0324200;Os03g0324300;Os07g0685700;Os08g0508700
vte3	TFmatrixID_0257	334	-	0.969	tgATGTAccca	EIN3	Os03g0324200;Os03g0324300;Os07g0685700;Os08g0508700;Os09g0490200
vte3	TFmatrixID_0259	599	+	0.949	aaGATCTa	GATA	Os01g0745700;Os02g0645600;Os02g0806300;Os03g0145200;Os05g0520300;Os10g0557600
vte3	TFmatrixID_0259	599	-	0.918	aAGATCta	GATA	Os01g0745700;Os02g0645600;Os02g0806300;Os03g0145200;Os05g0520300;Os10g0557600
vte3	TFmatrixID_0260	599	+	0.969	aAGATCta	GATA	Os01g0745700;Os02g0645600;Os02g0806300;Os03g0145200;Os05g0520300;Os10g0557600
vte3	TFmatrixID_0260	599	-	0.944	aaGATCTa	GATA	Os01g0745700;Os02g0645600;Os02g0806300;Os03g0145200;Os05g0520300;Os10g0557600
vte3	TFmatrixID_0261	600	-	1	aGATCTa	Dof;GATA	Os03g0684000;Os02g0148500;Os03g0734900
vte3	TFmatrixID_0262	456	+	0.999	gtTGATCat	GATA	Os01g0976800;Os02g0220400;Os03g0831200;Os05g0155400;Os05g0578900;Os06g0571800
vte3	TFmatrixID_0262	457	-	1	ttGATCAtg	GATA	Os01g0976800;Os02g0220400;Os03g0831200;Os05g0155400;Os05g0578900;Os06g0571800
vte3	TFmatrixID_0262	542	-	0.999	caGATCAtt	GATA	Os01g0976800;Os02g0220400;Os03g0831200;Os05g0155400;Os05g0578900;Os06g0571800
vte3	TFmatrixID_0262	1322	+	0.999	tgTGATCta	GATA	Os01g0976800;Os02g0220400;Os03g0831200;Os05g0155400;Os05g0578900;Os06g0571800
vte3	TFmatrixID_0264	598	+	0.999	caAGATCtat	GATA	Os01g0745700;Os02g0645600;Os02g0806300;Os03g0145200;Os05g0520300;Os10g0557600
vte3	TFmatrixID_0264	598	-	0.999	caaGATCTat	GATA	Os01g0745700;Os02g0645600;Os02g0806300;Os03g0145200;Os05g0520300;Os10g0557600
vte3	TFmatrixID_0265	597	-	0.978	gcaaGATCTa	GATA	Os01g0745700;Os02g0645600;Os02g0806300;Os03g0145200;Os05g0520300;Os10g0557600
vte3	TFmatrixID_0265	599	+	0.997	aAGATCtata	GATA	Os01g0745700;Os02g0645600;Os02g0806300;Os03g0145200;Os05g0520300;Os10g0557600
vte3	TFmatrixID_0265	1329	-	0.953	tactGATCTt	GATA	Os01g0745700;Os02g0645600;Os02g0806300;Os03g0145200;Os05g0520300;Os10g0557600
vte3	TFmatrixID_0266	598	-	0.989	caAGATCta	GATA	Os01g0745700;Os02g0645600;Os02g0806300;Os03g0145200;Os05g0520300;Os10g0557600
vte3	TFmatrixID_0266	599	+	0.998	aaGATCTat	GATA	Os01g0745700;Os02g0645600;Os02g0806300;Os03g0145200;Os05g0520300;Os10g0557600
vte3	TFmatrixID_0266	1323	+	0.986	gtGATCTac	GATA	Os01g0745700;Os02g0645600;Os02g0806300;Os03g0145200;Os05g0520300;Os10g0557600
vte3	TFmatrixID_0267	598	+	0.997	caAGATCtat	GATA	Os01g0745700;Os02g0645600;Os02g0806300;Os03g0145200;Os05g0520300;Os10g0557600
vte3	TFmatrixID_0267	598	-	0.997	caaGATCTat	GATA	Os01g0745700;Os02g0645600;Os02g0806300;Os03g0145200;Os05g0520300;Os10g0557600
vte3	TFmatrixID_0269	597	-	0.99	gcaAGATCtat	GATA	Os01g0745700;Os02g0645600;Os02g0806300;Os03g0145200;Os05g0520300;Os10g0557600
vte3	TFmatrixID_0269	598	+	0.986	caaGATCTata	GATA	Os01g0745700;Os02g0645600;Os02g0806300;Os03g0145200;Os05g0520300;Os10g0557600
vte3	TFmatrixID_0270	542	+	0.997	cAGATCatta	GATA	Os01g0745700;Os02g0645600;Os02g0806300;Os03g0145200;Os05g0520300;Os10g0557600;Os11g0187200
vte3	TFmatrixID_0270	597	-	1	gcaaGATCTa	GATA	Os01g0745700;Os02g0645600;Os02g0806300;Os03g0145200;Os05g0520300;Os10g0557600;Os11g0187200
vte3	TFmatrixID_0270	1321	-	0.997	atgtGATCTa	GATA	Os01g0745700;Os02g0645600;Os02g0806300;Os03g0145200;Os05g0520300;Os10g0557600;Os11g0187200
vte3	TFmatrixID_0271	541	-	0.969	acAGATCatt	GATA	Os01g0745700;Os02g0645600;Os02g0806300;Os03g0145200;Os05g0520300;Os10g0557600;Os11g0187200
vte3	TFmatrixID_0271	598	+	0.989	caaGATCTat	GATA	Os01g0745700;Os02g0645600;Os02g0806300;Os03g0145200;Os05g0520300;Os10g0557600;Os11g0187200
vte3	TFmatrixID_0271	598	-	0.99	caAGATCtat	GATA	Os01g0745700;Os02g0645600;Os02g0806300;Os03g0145200;Os05g0520300;Os10g0557600;Os11g0187200
vte3	TFmatrixID_0279	409	-	1	tgTTCATg	Homeodomain	Os01g0672201;Os05g0562400
vte3	TFmatrixID_0280	546	-	0.943	tcATTAAaag	Homeodomain; HD-ZIP	Os02g0674800;Os04g0569100;Os04g0627000;Os06g0207966;Os08g0136100;Os08g0187500;Os09g0526200;Os10g0575600
vte3	TFmatrixID_0296	659	-	0.997	ttgGATTAtg	Homeodomain; ZF-HD	Os02g0706600
vte3	TFmatrixID_0296	668	-	0.999	gtgGATTAgg	Homeodomain; ZF-HD	Os02g0706600
vte3	TFmatrixID_0296	817	+	0.998	gtTAATCttc	Homeodomain; ZF-HD	Os02g0706600
vte3	TFmatrixID_0310	296	-	0.982	tgGTAAAtca	MADF	Os02g0104500;Os04g0541100;Os10g0516500
vte3	TFmatrixID_0311	296	-	0.992	tgGTAAAtca	MADF	Os02g0104500;Os04g0541100;Os10g0516500
vte3	TFmatrixID_0334	525	-	0.951	aGATATata	Myb/SANT	Os06g0728700
vte3	TFmatrixID_0336	646	-	0.932	tatACCTAtca	Myb/SANT	Os05g0429900;LOC_Os08g43550;Os09g0538400;Os11g0180900;Os12g0175400
vte3	TFmatrixID_0357	771	+	0.972	aaAATATttt	Myb/SANT; G2-like	Os02g0696900;Os03g0766500;Os08g0160300;Os08g0426866;Os09g0395300
vte3	TFmatrixID_0357	771	-	0.972	aaaATATTtt	Myb/SANT; G2-like	Os02g0696900;Os03g0766500;Os08g0160300;Os08g0426866;Os09g0395300
vte3	TFmatrixID_0369	524	-	0.977	aaGATATat	Myb/SANT	Os08g0157600
vte3	TFmatrixID_0382	427	-	1	caTTGACca	NAC; NAM	Os01g0104200;Os01g0816100;Os03g0327800;Os05g0421600;Os07g0566500;Os07g0683200;Os11g0126900;Os11g0184900;Os12g0123700
vte3	TFmatrixID_0384	63	-	0.782	acaAGTAAt	NAC; NAM	Os06g0101800;Os08g0157900
vte3	TFmatrixID_0384	149	+	0.887	aTTACTtca	NAC; NAM	Os06g0101800;Os08g0157900
vte3	TFmatrixID_0384	585	+	0.895	tTTACTtaa	NAC; NAM	Os06g0101800;Os08g0157900
vte3	TFmatrixID_0384	788	-	0.782	agaAGTAAt	NAC; NAM	Os06g0101800;Os08g0157900
vte3	TFmatrixID_0398	1304	-	0.966	atCGTACag	SBP	Os01g0922600;Os02g0139400;Os02g0174100;Os02g0177300;Os03g0833300;Os04g0551500;Os04g0656500;Os06g0659100;LOC_Os07g32170;Os08g0509600;Os08g0513700;Os08g0531600;Os09g0507100
vte3	TFmatrixID_0398	1423	-	0.967	ttCGTACat	SBP	Os01g0922600;Os02g0139400;Os02g0174100;Os02g0177300;Os03g0833300;Os04g0551500;Os04g0656500;Os06g0659100;LOC_Os07g32170;Os08g0509600;Os08g0513700;Os08g0531600;Os09g0507100
vte3	TFmatrixID_0399	1303	-	0.934	catCGTACag	SBP	Os01g0922600;Os02g0177300;Os03g0833300;Os04g0551500;Os04g0656500;Os06g0659100;Os06g0703500;LOC_Os07g32170;Os08g0509600;Os08g0513700;Os09g0507100
vte3	TFmatrixID_0399	1422	-	0.935	tttCGTACat	SBP	Os01g0922600;Os02g0177300;Os03g0833300;Os04g0551500;Os04g0656500;Os06g0659100;Os06g0703500;LOC_Os07g32170;Os08g0509600;Os08g0513700;Os09g0507100
vte3	TFmatrixID_0400	1305	-	0.985	tCGTACagg	SBP	Os01g0292900;Os01g0922600;Os02g0177300;Os03g0833300;Os04g0656500;Os06g0659100;Os06g0703500;LOC_Os07g32170;Os08g0509600;Os08g0513700;Os08g0531600;Os09g0507100;Os11g0496600
vte3	TFmatrixID_0400	1424	-	0.985	tCGTACata	SBP	Os01g0292900;Os01g0922600;Os02g0177300;Os03g0833300;Os04g0656500;Os06g0659100;Os06g0703500;LOC_Os07g32170;Os08g0509600;Os08g0513700;Os08g0531600;Os09g0507100;Os11g0496600
vte3	TFmatrixID_0401	1422	-	0.905	tttCGTACataa	SBP	Os01g0922600;Os02g0139400;Os02g0174100;Os02g0177300;Os04g0656500;Os06g0659100;Os06g0663500;Os06g0703500;Os08g0509600;Os08g0531600;Os09g0507100;Os11g0496600
vte3	TFmatrixID_0402	1303	-	0.994	catCGTACa	SBP	Os02g0177300;Os03g0833300;Os04g0551500;Os04g0656500;Os06g0659100;LOC_Os07g32170;Os08g0509600;Os08g0513700;Os08g0531600;Os09g0507100
vte3	TFmatrixID_0402	1422	-	0.994	tttCGTACa	SBP	Os02g0177300;Os03g0833300;Os04g0551500;Os04g0656500;Os06g0659100;LOC_Os07g32170;Os08g0509600;Os08g0513700;Os08g0531600;Os09g0507100
vte3	TFmatrixID_0403	1304	+	0.995	atCGTACagg	SBP	Os01g0922600;Os02g0139400;Os02g0174100;Os02g0177300;Os03g0833300;Os04g0656500;Os06g0659100;Os06g0703500;LOC_Os07g32170;Os08g0509600;Os08g0513700;Os08g0531600;Os09g0507100;Os11g0496600
vte3	TFmatrixID_0403	1423	+	0.99	ttCGTACata	SBP	Os01g0922600;Os02g0139400;Os02g0174100;Os02g0177300;Os03g0833300;Os04g0656500;Os06g0659100;Os06g0703500;LOC_Os07g32170;Os08g0509600;Os08g0513700;Os08g0531600;Os09g0507100;Os11g0496600
vte3	TFmatrixID_0404	1304	-	0.971	atCGTACag	SBP	Os03g0833300;Os04g0551500;Os06g0659100;LOC_Os07g32170;Os08g0509600;Os08g0513700
vte3	TFmatrixID_0404	1423	-	0.971	ttCGTACat	SBP	Os03g0833300;Os04g0551500;Os06g0659100;LOC_Os07g32170;Os08g0509600;Os08g0513700
vte3	TFmatrixID_0405	1304	-	0.983	atCGTACa	SBP	Os01g0922600;Os02g0174100;Os02g0177300;Os03g0833300;Os04g0551500;Os04g0656500;Os06g0659100;LOC_Os07g32170;Os08g0509600;Os08g0513700;Os08g0531600;Os09g0507100;Os11g0496600
vte3	TFmatrixID_0405	1423	-	0.983	ttCGTACa	SBP	Os01g0922600;Os02g0174100;Os02g0177300;Os03g0833300;Os04g0551500;Os04g0656500;Os06g0659100;LOC_Os07g32170;Os08g0509600;Os08g0513700;Os08g0531600;Os09g0507100;Os11g0496600
vte3	TFmatrixID_0406	1303	-	0.996	catCGTACa	SBP	Os05g0408200
vte3	TFmatrixID_0406	1422	-	0.994	tttCGTACa	SBP	Os05g0408200
vte3	TFmatrixID_0407	1305	-	0.943	tCGTACa	SBP	Os01g0922600;Os02g0139400;Os02g0177300;Os03g0833300;Os04g0656500;Os06g0659100;Os06g0703500;LOC_Os07g32170;Os08g0509600;Os08g0513700;Os08g0531600;Os09g0507100;Os11g0496600
vte3	TFmatrixID_0407	1424	-	0.943	tCGTACa	SBP	Os01g0922600;Os02g0139400;Os02g0177300;Os03g0833300;Os04g0656500;Os06g0659100;Os06g0703500;LOC_Os07g32170;Os08g0509600;Os08g0513700;Os08g0531600;Os09g0507100;Os11g0496600
vte3	TFmatrixID_0408	1304	-	0.974	atCGTACag	SBP	Os01g0922600;Os02g0139400;Os02g0174100;Os02g0177300;Os03g0833300;Os04g0551500;Os04g0656500;Os06g0659100;Os06g0703500;LOC_Os07g32170;Os08g0509600;Os08g0513700;Os08g0531600;Os09g0491532;Os09g0507100;Os11g0496600
vte3	TFmatrixID_0408	1423	-	0.974	ttCGTACat	SBP	Os01g0922600;Os02g0139400;Os02g0174100;Os02g0177300;Os03g0833300;Os04g0551500;Os04g0656500;Os06g0659100;Os06g0703500;LOC_Os07g32170;Os08g0509600;Os08g0513700;Os08g0531600;Os09g0491532;Os09g0507100;Os11g0496600
vte3	TFmatrixID_0409	1304	-	0.999	atCGTACagg	SBP	Os01g0922600;Os02g0139400;Os02g0174100;Os02g0177300;Os03g0833300;Os04g0551500;Os04g0656500;Os06g0659100;Os06g0703500;LOC_Os07g32170;Os08g0509600;Os08g0513700;Os08g0531600;Os09g0507100;Os11g0496600
vte3	TFmatrixID_0410	1304	-	0.993	atCGTACag	SBP	Os01g0922600;Os02g0139400;Os02g0174100;Os02g0177300;Os03g0833300;Os04g0551500;Os04g0656500;Os06g0659100;Os06g0703500;LOC_Os07g32170;Os08g0509600;Os08g0513700;Os08g0531600;Os09g0507100;Os11g0496600
vte3	TFmatrixID_0410	1423	-	0.992	ttCGTACat	SBP	Os01g0922600;Os02g0139400;Os02g0174100;Os02g0177300;Os03g0833300;Os04g0551500;Os04g0656500;Os06g0659100;Os06g0703500;LOC_Os07g32170;Os08g0509600;Os08g0513700;Os08g0531600;Os09g0507100;Os11g0496600
vte3	TFmatrixID_0411	1305	-	0.978	tCGTACaggc	SBP	Os01g0922600;Os02g0139400;Os02g0174100;Os02g0177300;Os03g0833300;Os04g0656500;Os06g0659100;Os06g0703500;LOC_Os07g32170;Os08g0509600;Os08g0513700;Os08g0531600;Os09g0507100;Os11g0496600
vte3	TFmatrixID_0411	1424	-	0.977	tCGTACataa	SBP	Os01g0922600;Os02g0139400;Os02g0174100;Os02g0177300;Os03g0833300;Os04g0656500;Os06g0659100;Os06g0703500;LOC_Os07g32170;Os08g0509600;Os08g0513700;Os08g0531600;Os09g0507100;Os11g0496600
vte3	TFmatrixID_0419	488	-	1	ATATAtt	TBP	Os10g0432300;Os12g0580300
vte3	TFmatrixID_0434	132	+	0.965	caGGGCCctg	TCP	Os01g0924400;Os02g0635800;Os04g0194600;Os04g0526000;Os09g0521300
vte3	TFmatrixID_0434	132	-	0.965	cagGGCCCtg	TCP	Os01g0924400;Os02g0635800;Os04g0194600;Os04g0526000;Os09g0521300
vte3	TFmatrixID_0440	414	-	0.926	atGGTCCt	TCP	Os01g0763200;Os03g0706500;Os03g0785800;Os05g0513100;LOC_Os07g04510;Os07g0152000;LOC_Os12g02090;Os12g0616400
vte3	TFmatrixID_0443	428	-	0.99	aTTGACca	WRKY	Os01g0182700;Os01g0185900;Os01g0186000;Os01g0289600;Os01g0584900;Os01g0586800;Os01g0626400;Os01g0656400;Os01g0665500;Os01g0714800;Os01g0730700;Os01g0734000;Os01g0750100;Os01g0820400;Os01g0820700;Os01g0820900;Os01g0821300;Os01g0821600;Os01g0972800;Os02g0265200;Os03g0321700;Os03g0335200;Os03g0758000;Os04g0545000;Os05g0183100;Os05g0233100;LOC_Os05g25700;Os05g0322900;Os05g0478400;Os05g0478700;Os05g04…
vte3	TFmatrixID_0445	428	-	1	aTTGACca	WRKY	Os01g0182700;Os01g0185900;Os01g0186000;Os01g0246700;Os01g0289600;Os01g0584900;Os01g0586800;Os01g0624700;Os01g0626400;Os01g0665500;Os01g0714800;Os01g0730700;Os01g0734000;Os01g0750100;Os01g0820900;Os01g0972800;Os02g0181300;Os02g0265200;Os02g0462800;Os02g0698800;Os02g0770500;Os03g0741400;Os03g0758000;Os03g0798500;Os03g0855100;Os04g0287400;Os04g0545000;Os04g0597300;Os04g0605100;Os05g0137500;Os05g0183…
vte3	TFmatrixID_0446	426	-	0.982	acaTTGACca	WRKY	Os01g0182700;Os01g0185900;Os01g0186000;Os01g0246700;Os01g0289600;Os01g0584900;Os01g0586800;Os01g0624700;Os01g0626400;Os01g0656400;Os01g0665500;Os01g0714800;Os01g0730700;Os01g0734000;Os01g0750100;Os01g0820400;Os01g0972800;Os02g0181300;Os02g0265200;Os02g0462800;Os02g0698800;Os02g0770500;Os03g0657400;Os03g0741400;Os03g0758000;Os03g0798500;Os03g0855100;Os04g0287400;Os04g0545000;Os04g0597300;Os04g0605…
vte3	TFmatrixID_0448	426	-	0.974	acaTTGACcag	WRKY	Os01g0182700;Os01g0185900;Os01g0186000;Os01g0246700;Os01g0289600;Os01g0584900;Os01g0586800;Os01g0624700;Os01g0626400;Os01g0665500;Os01g0714800;Os01g0730700;Os01g0734000;Os01g0750100;Os01g0820900;Os01g0972800;Os02g0181300;Os02g0265200;Os02g0462800;Os02g0698800;Os02g0770500;Os03g0741400;Os03g0758000;Os03g0798500;Os03g0855100;Os04g0287400;Os04g0545000;Os04g0597300;Os04g0605100;Os05g0137500;Os05g0183…
vte3	TFmatrixID_0449	428	-	0.969	aTTGACca	WRKY	Os01g0826400;Os03g0444900;Os03g0758900;Os04g0471700;Os05g0343400;Os05g0474800;Os07g0583700;Os07g0596900;Os08g0276200;Os08g0499300;Os11g0686250;Os12g0507300
vte3	TFmatrixID_0451	427	-	0.996	caTTGACcag	WRKY	Os01g0826400;Os03g0444900;Os03g0758900;Os04g0471700;Os05g0343400;Os05g0474800;Os07g0583700;Os07g0596900;Os08g0276200;Os08g0499300;Os11g0685700;Os11g0686250;Os12g0507300
vte3	TFmatrixID_0455	426	-	0.919	acaTTGACcag	WRKY	Os01g0182700;Os01g0185900;Os01g0186000;Os01g0246700;Os01g0289600;Os01g0584900;Os01g0586800;Os01g0624700;Os01g0626400;Os01g0656400;Os01g0665500;Os01g0714800;Os01g0730700;Os01g0734000;Os01g0750100;Os01g0820400;Os01g0972800;Os02g0181300;Os02g0265200;Os02g0462800;Os02g0698800;Os02g0770500;Os03g0335200;Os03g0741400;Os03g0758000;Os03g0798500;Os03g0855100;Os04g0287400;Os04g0545000;Os04g0597300;Os04g0605…
vte3	TFmatrixID_0457	426	-	0.969	acaTTGACca	WRKY	Os01g0182700;Os01g0185900;Os01g0186000;Os01g0246700;Os01g0289600;Os01g0584900;Os01g0586800;Os01g0624700;Os01g0626400;Os01g0656400;Os01g0665500;Os01g0714800;Os01g0730700;Os01g0734000;Os01g0750100;Os01g0820400;Os01g0820700;Os01g0820900;Os01g0821300;Os01g0972800;Os02g0181300;Os02g0265200;Os02g0462800;Os02g0698800;Os02g0770500;Os03g0335200;Os03g0657400;Os03g0741400;Os03g0758000;Os03g0798500;Os03g0855…
vte3	TFmatrixID_0458	427	-	0.998	caTTGACcag	WRKY	Os01g0182700;Os01g0185900;Os01g0186000;Os01g0246700;Os01g0289600;Os01g0584900;Os01g0586800;Os01g0624700;Os01g0626400;Os01g0656400;Os01g0665500;Os01g0714800;Os01g0730700;Os01g0734000;Os01g0750100;Os01g0820900;Os01g0972800;Os02g0181300;Os02g0265200;Os02g0462800;Os02g0698800;Os02g0770500;Os03g0741400;Os03g0758000;Os03g0798500;Os03g0855100;Os04g0287400;Os04g0545000;Os04g0597300;Os04g0605100;Os05g0137…
vte3	TFmatrixID_0459	428	-	0.932	aTTGACca	WRKY	Os01g0182700;Os01g0185900;Os01g0186000;Os01g0289600;Os01g0626400;Os01g0656400;Os01g0665500;Os01g0734000;Os01g0820400;Os01g0820700;Os01g0820900;Os01g0821300;Os01g0821600;Os01g0972800;Os02g0265200;Os03g0321700;Os03g0335200;Os03g0741400;Os03g0758000;Os04g0287400;Os04g0545000;Os05g0233100;LOC_Os05g25700;Os05g0322900;Os05g0478400;Os05g0478700;Os05g0478800;Os05g0571200;Os05g0583000;Os06g0158100;Os06g05…
vte3	TFmatrixID_0461	425	-	0.929	cacaTTGACc	WRKY	Os01g0182700;Os01g0185900;Os01g0186000;Os01g0246700;Os01g0289600;Os01g0586800;Os01g0624700;Os01g0656400;Os01g0714800;Os01g0730700;Os01g0734000;Os01g0750100;Os01g0820400;Os01g0820700;Os01g0820900;Os01g0821300;Os01g0821600;Os01g0972800;Os02g0181300;Os02g0265200;Os02g0462800;Os02g0698800;Os02g0770500;Os03g0321700;Os03g0335200;Os03g0741400;Os03g0798500;Os03g0855100;Os04g0287400;Os04g0545000;Os04g0597…
vte3	TFmatrixID_0463	427	-	0.997	caTTGACcag	WRKY	Os01g0182700;Os01g0185900;Os01g0186000;Os01g0246700;Os01g0289600;Os01g0584900;Os01g0586800;Os01g0624700;Os01g0626400;Os01g0656400;Os01g0665500;Os01g0714800;Os01g0730700;Os01g0734000;Os01g0750100;Os01g0972800;Os02g0181300;Os02g0265200;Os02g0462800;Os02g0698800;Os02g0770500;Os03g0335200;Os03g0657400;Os03g0741400;Os03g0758000;Os03g0798500;Os03g0855100;Os04g0287400;Os04g0545000;Os04g0597300;Os04g0605…
vte3	TFmatrixID_0465	428	-	0.984	aTTGACca	WRKY	Os01g0826400;Os03g0444900;Os03g0758900;Os04g0471700;Os05g0343400;Os05g0474800;Os07g0583700;Os07g0596900;Os08g0276200;Os08g0499300;Os11g0685700;Os11g0686250;Os12g0507300
vte3	TFmatrixID_0466	427	-	0.994	caTTGACcag	WRKY	Os01g0182700;Os01g0185900;Os01g0186000;Os01g0246700;Os01g0289600;Os01g0584900;Os01g0586800;Os01g0624700;Os01g0626400;Os01g0665500;Os01g0714800;Os01g0730700;Os01g0734000;Os01g0750100;Os01g0972800;Os02g0181300;Os02g0265200;Os02g0462800;Os02g0698800;Os02g0770500;Os03g0741400;Os03g0758000;Os03g0798500;Os03g0855100;Os04g0287400;Os04g0545000;Os04g0597300;Os04g0605100;Os05g0137500;Os05g0183100;Os05g0478…
vte3	TFmatrixID_0467	424	-	0.931	tcacaTTGACcag	WRKY	Os01g0656400
vte3	TFmatrixID_0468	427	-	0.993	caTTGACca	WRKY	Os01g0182700;Os01g0185900;Os01g0186000;Os01g0246700;Os01g0289600;Os01g0584900;Os01g0586800;Os01g0624700;Os01g0626400;Os01g0656400;Os01g0665500;Os01g0730700;Os01g0734000;Os01g0750100;Os01g0820400;Os01g0820700;Os01g0820900;Os01g0821300;Os01g0972800;Os02g0265200;Os02g0462800;Os02g0698800;Os02g0770500;Os03g0335200;Os03g0657400;Os03g0741400;Os03g0758000;Os03g0798500;Os03g0855100;Os04g0287400;Os04g0545…
vte3	TFmatrixID_0490	278	-	0.989	tGACGTt	bZIP	Os01g0279900;Os01g0808100;Os01g0859500;Os02g0194900;Os03g0318600;Os04g0637000;Os05g0443850;Os05g0492000;Os06g0265400;Os06g0614100;Os07g0687700;Os08g0176900;Os09g0280500;Os09g0489500;Os11g0152700;Os12g0152900
vte3	TFmatrixID_0491	481	-	0.909	tagacctATATAtttatctca	TBP	Os10g0432300;Os12g0580300
vte3	TFmatrixID_0491	519	+	0.919	cactaaagaTATATagtcatt	TBP	Os10g0432300;Os12g0580300
vte3	TFmatrixID_0508	682	+	0.875	cCAAAAtatgg	MADS box; MIKC; M-type	Os01g0201700;Os01g0883100;Os01g0886200;Os02g0104100;Os02g0170300;Os02g0682200;Os02g0731200;Os03g0122600;Os03g0752800;Os03g0753100;Os04g0580700;LOC_Os05g11380;Os05g0203800;Os06g0162800;Os07g0108900;Os08g0494100;Os08g0531700;Os09g0507200;Os10g0536100;Os12g0207000
vte3	TFmatrixID_0508	921	+	0.906	cCAAAAaaaaa	MADS box; MIKC; M-type	Os01g0201700;Os01g0883100;Os01g0886200;Os02g0104100;Os02g0170300;Os02g0682200;Os02g0731200;Os03g0122600;Os03g0752800;Os03g0753100;Os04g0580700;LOC_Os05g11380;Os05g0203800;Os06g0162800;Os07g0108900;Os08g0494100;Os08g0531700;Os09g0507200;Os10g0536100;Os12g0207000
[truncated: 6,734 more rows]

## Sheet: Supplementary Table S6
Supplementary Table S6. Co-expression analysis of the genes involved in tocopherol biosynthesis pathway at different developmental stages.
Gene name	Accession	Description	Co -expressed gene(s)
			(Threshold ≥ 0.6)
Osvte1	Os02g0276500	Tocopherol cyclase	-
Osvte2	Os05g0274950	Similar to homogentisate phytyltransferase VTE2-1	-
Osvte2-1	Os06g0658900	Homogentisate phytyltransferase (HPT)	-
Osvte3	Os07g0179300	Methyltransferase type 11 domain containing protein	-
Osvte4	Os02g0701600	Tocopherol O-methyltransferase	Os08g0481400, HD-ZIP protein HOX20
Osvte5	Os04g0670700	Similar to H0624F09.4 protein	-
Osvte6-1	Os01g0729100	Protein of unknown function DUF92	Os06g0194000;ERF71
Osvte6-2	Os01g0507300	Protein of unknown function DUF92	Os02g0265200;WRKY transcription factor 39
			Os02g0698800;WRKY 66
			Os02g0705500, OsbHLH079
			Os02g0182800, HOS58
Osvte7	-	-	-
OsHPPD	Os02g0168100	Similar to 4-hydroxyphenylpyruvate dioxygenase	Os01g0584900,Rice WRKY gene77
			Os03g0122600, OsMADS50
			Os09g0379600;HD-ZIP protein HOX25
TAT-1	Os02g0302200	Similar to aminotransferase family protein	-
TAT-2	Os02g0302450	tyrosine aminotransferase	-
OsHGGT	Os06g0646900	Similar to Homogentisic acid geranylgeranyl transferase	Os06g0193400; OsbHLH096
			Os01g0834400; HAP3
OsGGPPS1	Os07g0580900	Geranylgeranyl diphosphate synthase	-

## Sheet: Supplementary Table S7
Supplementary Table S7. Correlation between tocopherol and fatty acide in rice oil.
Taxa	Alpha	Total	C16:0	C18:0	C18:1	C18:2	SUM of F.A
g57	1.6444	2.94869	18.3	3.9	30.1	22.9	75.2
g93	0.0766	0.230205	17.17	3.8	36.28	28.99	86.24			C16:0	C18:0	C18:1	C18:2		Total corrolation between total tocopherol and total fatty acide
g170	0.3841	2.36289	20.34	9.3	30.39	24.17	84.2		Alpha	0.042477	-0.428397	0.106396	0.45371		0.133036
g253	30.8341	31.7677	18.14	3.44	33.75	27.78	83.11		Total	0.100217	-0.393897	0.0518963	0.434156
g275	0.33	0.350632	16.29	5.87	34.85	22.83	79.84

## Sheet: Supplementary Table S8
Supplementary Table S8. List of primers in this study
Number	Primer Name	Sequence 5'→ 3'
1	ABCF4-F	GTTGCTCAAGAGATTTGGGTGT
2	ABCF4-R	GAGGAGCTGTCAAGAGAGGAAG
3	PIP5KS-F	TCCTCAAAATGCTTCACAAGAG
4	PIP5KS-R	TCTGTGCAAATGAGAGTCCAAG
5	RGP-2-F	CAGTGACAGGGAAATCCAAAG
6	RGP-2-R	GCCATGAAAACGAAAGACTACA
7	WRKY39-F	ACGAGCTCCTCTTCCTCAAC
8	WRKY39-R	CTTCCTTTCCCTTTCCTTTTTC
9	MADS-box 59-F	AAGGAAGTCAAAGGCAGTTGTT
10	MADS-box 59-R	TTCGCTGGAAATTCACACTATC
11	OsActin-F	ATTACCTCATGAAGATCCTGACG
12	OsActin-R	TCTCCATTTCCTGGTCATAGTC
